# Supplementary material for: AGO1 regulates pericentromeric regions in mouse embryonic stem cells
Source: bioRxiv preprint, doi:10.1101/2021.07.26.453733, version 2 (2022-02-08)
Supplement: Table S2 [file 453733_file03.xlsx]

## Sheet: mirbase_mmu21_log2+1_counts
Table S2: sRNA-seq (miRNAs) log2+1 of CPM values in WT mESCs. Related to Fig4 and S4
Geneid	Chr	Start	End	Strand	Length	WT_1	WT_2
mmu-miR-6341	chr1	12426016	12426038	+	23	0	0
mmu-miR-206-5p	chr1	20679017	20679039	+	23	0	0
mmu-miR-206-3p	chr1	20679055	20679076	+	22	0	0
mmu-miR-133b-5p	chr1	20682797	20682818	+	22	0	0
mmu-miR-133b-3p	chr1	20682834	20682855	+	22	0	0
mmu-miR-30a-5p	chr1	23272274	23272295	+	22	13.3498	13.0728
mmu-miR-30a-3p	chr1	23272315	23272336	+	22	8.90511	8.60572
mmu-miR-30c-5p	chr1	23291714	23291736	+	23	11.6342	11.739
mmu-miR-30c-2-3p	chr1	23291754	23291775	+	22	6.85039	6.36947
mmu-miR-6342	chr1	29421552	29421573	+	22	0	0
mmu-miR-6896-5p	chr1	34117364	34117385	+	22	2.1352	2.50269
mmu-miR-6896-3p	chr1	34117408	34117429	+	22	0	0
mmu-miR-5103	chr1	34433130	34433149	-	20	0	0
mmu-miR-6897-5p	chr1	36144290	36144312	-	23	0	0
mmu-miR-6897-3p	chr1	36144252	36144272	-	21	0	0
mmu-miR-6898-5p	chr1	36348732	36348753	-	22	0	0
mmu-miR-6898-3p	chr1	36348688	36348708	-	21	0	0
mmu-miR-6349	chr1	39186908	39186929	-	22	0	0
mmu-miR-6350	chr1	47467097	47467117	-	21	0	0
mmu-miR-7681-5p	chr1	53849424	53849443	+	20	0	0
mmu-miR-7681-3p	chr1	53849474	53849495	+	22	0	0
mmu-miR-6899-5p	chr1	64042476	64042496	-	21	0	0
mmu-miR-6899-3p	chr1	64042438	64042460	-	23	0	0.663052
mmu-miR-6351	chr1	73855553	73855575	-	23	0	0
mmu-miR-1928	chr1	74206562	74206578	-	17	0	0
mmu-miR-26b-5p	chr1	74394324	74394344	+	21	10.8922	11.0067
mmu-miR-26b-3p	chr1	74394360	74394381	+	22	5.75043	5.96023
mmu-miR-375-5p	chr1	74900696	74900717	-	22	0	0
mmu-miR-375-3p	chr1	74900661	74900682	-	22	4.71176	4.82889
mmu-miR-6343	chr1	76509620	76509641	+	22	0	0
mmu-miR-6352	chr1	77496731	77496752	-	22	0	0
mmu-miR-6344	chr1	82131926	82131947	+	22	0	0
mmu-miR-6353	chr1	84218926	84218948	-	23	0.570181	0
mmu-miR-5126	chr1	84695890	84695911	+	22	10.2325	6.06453
mmu-miR-8096	chr1	85751983	85752002	+	20	0	0
mmu-miR-3535	chr1	86352062	86352087	-	26	6.79479	6.6632
mmu-miR-6900-5p	chr1	92464514	92464537	-	24	0.570181	0
mmu-miR-6900-3p	chr1	92464483	92464503	-	21	0	0
mmu-miR-149-5p	chr1	92850381	92850403	+	23	8.39412	8.58395
mmu-miR-149-3p	chr1	92850421	92850442	+	22	0	0
mmu-miR-6901-5p	chr1	93274554	93274573	+	20	0.97777	0
mmu-miR-6901-3p	chr1	93274585	93274604	+	20	0	0
mmu-miR-6902-5p	chr1	93346097	93346118	+	22	0.570181	0.663052
mmu-miR-6902-3p	chr1	93346135	93346155	+	21	0	0.663052
mmu-miR-6345	chr1	93352191	93352211	+	21	0	0
mmu-miR-3473f	chr1	106546536	106546555	-	20	0	0
mmu-miR-6346	chr1	118954278	118954299	+	22	0	0
mmu-miR-128-1-5p	chr1	128202369	128202389	+	21	6.39866	6.54198
mmu-miR-128-3p	chr1	128202404	128202424	+	21	9.80465	9.98228
mmu-miR-135b-5p	chr1	132198103	132198125	+	23	7.01623	7.22665
mmu-miR-135b-3p	chr1	132198142	132198163	+	22	6.35661	6.58645
mmu-miR-6903-5p	chr1	133726619	133726640	-	22	0.570181	0
mmu-miR-6903-3p	chr1	133726564	133726583	-	20	0	0
mmu-miR-1231-5p	chr1	135454661	135454683	-	23	1.77549	1.45958
mmu-miR-1231-3p	chr1	135454603	135454625	-	23	1.29521	1.9698
mmu-miR-181a-5p	chr1	137966468	137966490	+	23	3.86511	2.89098
mmu-miR-181a-1-3p	chr1	137966508	137966529	+	22	0.570181	1.1156
mmu-miR-181b-5p	chr1	137966650	137966672	+	23	2.42288	1.9698
mmu-miR-181b-1-3p	chr1	137966690	137966708	+	19	0	0
mmu-miR-7682-5p	chr1	151442393	151442416	+	24	0	0
mmu-miR-7682-3p	chr1	151442430	151442450	+	21	0.570181	0
mmu-miR-8114	chr1	153899989	153900009	+	21	4.31496	4.76841
mmu-miR-488-5p	chr1	158505651	158505671	+	21	0.570181	0.663052
mmu-miR-488-3p	chr1	158505689	158505709	+	21	2.42288	2.64405
mmu-miR-1843b-5p	chr1	159340362	159340382	+	21	4.83938	4.57008
mmu-miR-1843b-3p	chr1	159340400	159340419	+	20	3.2079	3.36945
mmu-miR-1927	chr1	160295885	160295907	-	23	1.29521	3.10175
mmu-miR-199a-5p	chr1	162217844	162217866	+	23	1.29521	0
mmu-miR-199a-3p	chr1	162217883	162217904	+	22	6.84432	6.38969
mmu-miR-214-5p	chr1	162223397	162223418	+	22	0	0
mmu-miR-214-3p	chr1	162223438	162223459	+	22	0	0
mmu-miR-6347	chr1	167290125	167290146	+	22	0	0
mmu-miR-6348	chr1	168490740	168490761	+	22	0	0
mmu-miR-6354	chr1	169019041	169019061	-	21	0	0
mmu-miR-6546-5p	chr1	171064629	171064652	-	24	3.2079	3.90711
mmu-miR-6546-3p	chr1	171064591	171064611	-	21	1.77549	2.34596
mmu-miR-7683-5p	chr1	171641879	171641900	-	22	0	0
mmu-miR-7683-3p	chr1	171641840	171641860	-	21	0	0
mmu-miR-350-5p	chr1	176772382	176772400	-	19	5.80147	5.67736
mmu-miR-350-3p	chr1	176772342	176772363	-	22	4.6294	4.01517
mmu-miR-6904-5p	chr1	180587206	180587227	+	22	0.570181	0
mmu-miR-6904-3p	chr1	180587243	180587260	+	18	0.97777	0.663052
mmu-miR-1981-5p	chr1	184822465	184822488	-	24	5.98931	5.93294
mmu-miR-1981-3p	chr1	184822409	184822429	-	21	6.04332	6.12608
mmu-miR-664-5p	chr1	185242975	185242995	+	21	3.76579	2.89098
mmu-miR-664-3p	chr1	185243012	185243033	+	22	2.1352	2.64405
mmu-miR-194-5p	chr1	185313325	185313346	+	22	6.62098	6.71219
mmu-miR-194-1-3p	chr1	185313360	185313381	+	22	0	0
mmu-miR-215-5p	chr1	185313610	185313630	+	21	3.86511	3.28561
mmu-miR-215-3p	chr1	185313647	185313667	+	21	0	0
mmu-miR-3473c	chr1	191998602	191998623	-	22	0	0
mmu-miR-205-5p	chr1	193507503	193507524	-	22	9.07551	8.86597
mmu-miR-205-3p	chr1	193507467	193507488	-	22	4.8636	4.1157
mmu-miR-3962	chr1	194822035	194822054	+	20	0.570181	0
mmu-miR-29b-3p	chr1	195037091	195037113	+	23	3.60268	2.77279
mmu-miR-29b-2-5p	chr1	195037050	195037074	+	25	0	0
mmu-miR-29c-5p	chr1	195037562	195037583	+	22	2.54772	2.77279
mmu-miR-29c-3p	chr1	195037600	195037621	+	22	5.68397	5.40679
mmu-miR-5104	chr10	7836441	7836464	+	24	0	0
mmu-miR-6413	chr10	20297593	20297613	-	21	0	0
mmu-miR-7663-5p	chr10	22729410	22729432	-	23	0	0
mmu-miR-7663-3p	chr10	22729372	22729393	-	22	0	0.663052
mmu-miR-6905-5p	chr10	24910669	24910691	+	23	0	0
mmu-miR-6905-3p	chr10	24910711	24910731	+	21	0	0
mmu-miR-3473b	chr10	41670774	41670793	+	20	0	0
mmu-miR-1929-5p	chr10	44359692	44359714	+	23	1.29521	1.1156
mmu-miR-1929-3p	chr10	44359734	44359755	+	22	0	0
mmu-miR-6906-5p	chr10	60126777	60126800	+	24	0	0
mmu-miR-6906-3p	chr10	60126813	60126833	+	21	0	0
mmu-miR-6408	chr10	60923077	60923100	+	24	0	0
mmu-miR-466j	chr10	60960802	60960824	+	23	0	0
mmu-miR-5108	chr10	61774795	61774813	+	19	0	0
mmu-miR-7662-5p	chr10	62194206	62194227	-	22	0	0
mmu-miR-7662-3p	chr10	62194167	62194190	-	24	0	0
mmu-miR-7215-5p	chr10	62682508	62682532	+	25	0	0
mmu-miR-7215-3p	chr10	62682536	62682558	+	23	0	0
mmu-miR-6409	chr10	76008993	76009015	+	23	0	0
mmu-miR-678	chr10	76207333	76207354	-	22	0	0
mmu-miR-1930-5p	chr10	77641236	77641257	+	22	0.97777	2.34596
mmu-miR-1930-3p	chr10	77641274	77641295	+	22	0	1.1156
mmu-miR-7659-5p	chr10	78340186	78340207	-	22	0	0
mmu-miR-7659-3p	chr10	78340150	78340172	-	23	0	0
mmu-miR-6907-5p	chr10	78408522	78408543	-	22	0.570181	0
mmu-miR-6907-3p	chr10	78408477	78408499	-	23	0.570181	0
mmu-miR-6410	chr10	78434803	78434824	+	22	0	0
mmu-miR-6908-5p	chr10	78445131	78445152	-	22	0	0
mmu-miR-6908-3p	chr10	78445095	78445116	-	22	0.570181	0
mmu-miR-6909-5p	chr10	79531064	79531085	-	22	0.570181	0
mmu-miR-6909-3p	chr10	79531029	79531050	-	22	0.570181	0
mmu-miR-6910-5p	chr10	79862592	79862614	+	23	0	0
mmu-miR-6910-3p	chr10	79862629	79862650	+	22	0	0
mmu-miR-6911-5p	chr10	80278169	80278191	+	23	0	0
mmu-miR-6911-3p	chr10	80278212	80278232	+	21	3.28166	3.10175
mmu-miR-6912-5p	chr10	80609265	80609286	+	22	0	0
mmu-miR-6912-3p	chr10	80609305	80609329	+	25	0	0
mmu-miR-1982-5p	chr10	80828808	80828827	+	20	0	0
mmu-miR-1982-3p	chr10	80828848	80828870	+	23	2.42288	1.45958
mmu-miR-5615-5p	chr10	81104652	81104673	-	22	1.77549	0.663052
mmu-miR-5615-3p	chr10	81104614	81104635	-	22	0	1.45958
mmu-miR-3057-5p	chr10	81271610	81271633	+	24	6.3133	6.30705
mmu-miR-3057-3p	chr10	81271654	81271675	+	22	0.97777	1.1156
mmu-miR-6913-5p	chr10	81386352	81386373	+	22	0	0
mmu-miR-6913-3p	chr10	81386390	81386412	+	23	0.97777	1.1156
mmu-miR-1191b-5p	chr10	81416276	81416297	-	22	1.96653	1.45958
mmu-miR-1191b-3p	chr10	81416240	81416261	-	22	0	0
mmu-miR-135a-5p	chr10	92072141	92072163	-	23	2.28619	2.17011
mmu-miR-135a-2-3p	chr10	92072104	92072124	-	21	0.570181	0.663052
mmu-miR-1251-5p	chr10	92137190	92137210	-	21	1.29521	0.663052
mmu-miR-1251-3p	chr10	92137152	92137172	-	21	0	0
mmu-miR-1931	chr10	93162879	93162900	+	22	0	0
mmu-miR-7688-5p	chr10	93433107	93433129	+	23	0	0
mmu-miR-7688-3p	chr10	93433142	93433162	+	21	0	0
mmu-miR-331-5p	chr10	93963817	93963838	-	22	4.68483	4.01517
mmu-miR-331-3p	chr10	93963783	93963803	-	21	5.55604	5.53939
mmu-miR-7211-5p	chr10	94586178	94586199	-	22	0	0.663052
mmu-miR-7211-3p	chr10	94586137	94586159	-	23	0	0
mmu-miR-3058-5p	chr10	95559286	95559308	-	23	0.570181	0.663052
mmu-miR-3058-3p	chr10	95559244	95559264	-	21	2.66262	2.64405
mmu-miR-3966	chr10	97423493	97423513	+	21	0	0
mmu-miR-3059-5p	chr10	101772704	101772725	+	22	0	0
mmu-miR-3059-3p	chr10	101772740	101772761	+	22	0	0
mmu-miR-6411	chr10	104287290	104287310	+	21	0	0
mmu-miR-763	chr10	120448052	120448073	-	22	0	0
mmu-miR-6412	chr10	122648412	122648433	+	22	0	0
mmu-miR-8104	chr10	122679336	122679357	+	22	0	0
mmu-let-7i-5p	chr10	122985698	122985719	-	22	6.79479	7.37092
mmu-let-7i-3p	chr10	122985642	122985663	-	22	0.570181	0
mmu-miR-378d	chr10	126710355	126710376	-	22	0.570181	1.1156
mmu-miR-26a-5p	chr10	126995543	126995564	+	22	14.0169	13.9175
mmu-miR-26a-2-3p	chr10	126995581	126995602	+	22	4.51172	4.01517
mmu-miR-546	chr10	126998471	126998486	+	16	0	0
mmu-miR-677-5p	chr10	128085291	128085312	+	22	6.83822	6.98892
mmu-miR-677-3p	chr10	128085335	128085360	+	26	2.42288	3.00021
mmu-miR-6914-5p	chr10	128382843	128382866	+	24	0	0
mmu-miR-6914-3p	chr10	128382882	128382900	+	19	1.55525	2.34596
mmu-miR-6915-5p	chr10	128388837	128388860	+	24	0	0
mmu-miR-6915-3p	chr10	128388879	128388900	+	22	0	0.663052
mmu-miR-8105	chr10	128458732	128458753	+	22	0.570181	2.34596
mmu-miR-6916-5p	chr10	128512005	128512025	-	21	0	1.45958
mmu-miR-6916-3p	chr10	128511968	128511989	-	22	0	0
mmu-miR-6917-5p	chr10	128584472	128584492	-	21	0	0
mmu-miR-6917-3p	chr10	128584437	128584458	-	22	0	0
mmu-miR-3060-5p	chr11	4139377	4139396	+	20	0	0
mmu-miR-3060-3p	chr11	4139413	4139434	+	22	3.048	2.77279
mmu-miR-6918-5p	chr11	4891350	4891372	+	23	0.570181	0.663052
mmu-miR-6918-3p	chr11	4891381	4891402	+	22	0	0
mmu-miR-7651-5p	chr11	6401630	6401651	+	22	0.97777	1.1156
mmu-miR-7651-3p	chr11	6401670	6401693	+	24	0.570181	0
mmu-miR-1933-5p	chr11	21344640	21344663	-	24	0	1.1156
mmu-miR-1933-3p	chr11	21344600	21344621	-	22	3.65913	3.36945
mmu-miR-6372	chr11	26202258	26202280	+	23	0	0
mmu-miR-216b-5p	chr11	28746204	28746225	+	22	0	0
mmu-miR-216b-3p	chr11	28746244	28746265	+	22	0	0
mmu-miR-216c-5p	chr11	28746244	28746266	-	23	0	0
mmu-miR-216c-3p	chr11	28746198	28746220	-	23	0	0
mmu-miR-216a-5p	chr11	28757018	28757039	+	22	0	0
mmu-miR-216a-3p	chr11	28757058	28757079	+	22	0	0
mmu-miR-217-5p	chr11	28763761	28763783	+	23	0	0
mmu-miR-217-3p	chr11	28763798	28763820	+	23	0	0
mmu-miR-218-5p	chr11	35616840	35616860	+	21	6.22257	6.26389
mmu-miR-218-2-3p	chr11	35616882	35616903	+	22	0	0.663052
mmu-miR-103-1-5p	chr11	35782410	35782432	+	23	0	0
mmu-miR-103-3p	chr11	35782447	35782469	+	23	11.3513	11.2906
mmu-miR-146a-5p	chr11	43374435	43374456	-	22	2.76903	1.73713
mmu-miR-146a-3p	chr11	43374399	43374420	-	22	0	0
mmu-miR-8100	chr11	46102300	46102322	+	23	0	0
mmu-miR-7239-5p	chr11	46170087	46170106	+	20	0	0
mmu-miR-7239-3p	chr11	46170124	46170143	+	20	0	0
mmu-miR-340-5p	chr11	50069720	50069741	+	22	9.49732	9.3922
mmu-miR-340-3p	chr11	50069762	50069783	+	22	5.58547	5.4265
mmu-miR-6919-5p	chr11	50232250	50232272	+	23	0	0
mmu-miR-6919-3p	chr11	50232286	50232306	+	21	0	0
mmu-miR-804	chr11	50357799	50357820	-	22	0	0
mmu-miR-3061-5p	chr11	52126759	52126780	+	22	2.86814	2.34596
mmu-miR-3061-3p	chr11	52126804	52126825	+	22	4.48073	4.63927
mmu-miR-6920-5p	chr11	53409202	53409223	+	22	0	0
mmu-miR-6920-3p	chr11	53409245	53409265	+	21	0	0
mmu-miR-7671-5p	chr11	53763632	53763654	-	23	0	0
mmu-miR-7671-3p	chr11	53763597	53763618	-	22	0	0
mmu-miR-7652-5p	chr11	55501226	55501247	+	22	0	0
mmu-miR-7652-3p	chr11	55501261	55501281	+	21	0.570181	1.45958
mmu-miR-6921-5p	chr11	60200591	60200612	-	22	0	0
mmu-miR-6921-3p	chr11	60200538	60200558	-	21	0.570181	0
mmu-miR-6922-5p	chr11	60202300	60202322	-	23	0.570181	0.663052
mmu-miR-6922-3p	chr11	60202262	60202284	-	23	0.97777	0.663052
mmu-miR-5100	chr11	60728698	60728718	+	21	3.81631	1.9698
mmu-miR-744-5p	chr11	65734799	65734820	-	22	9.66347	9.74689
mmu-miR-744-3p	chr11	65734742	65734763	-	22	4.44907	3.44868
mmu-miR-6923-5p	chr11	67099804	67099827	+	24	0	0
mmu-miR-6923-3p	chr11	67099855	67099875	+	21	0	0
mmu-miR-6406	chr11	68220917	68220938	+	22	0	0
mmu-miR-3062-5p	chr11	68990638	68990659	-	22	1.55525	1.9698
mmu-miR-3062-3p	chr11	68990597	68990615	-	19	0	0
mmu-miR-467f	chr11	69635419	69635439	-	21	0.570181	0
mmu-miR-1934-5p	chr11	69663055	69663077	+	23	3.35184	4.01517
mmu-miR-1934-3p	chr11	69663092	69663113	+	22	1.55525	0.663052
mmu-miR-6924-5p	chr11	69882067	69882089	-	23	0	0
mmu-miR-6924-3p	chr11	69882032	69882052	-	21	0	0
mmu-miR-324-5p	chr11	70012060	70012082	+	23	5.39918	5.64409
mmu-miR-324-3p	chr11	70012095	70012114	+	20	6.72379	6.87163
mmu-miR-497b	chr11	70234763	70234786	-	24	0.570181	0.663052
mmu-miR-497a-5p	chr11	70234730	70234751	+	22	8.46113	8.52118
mmu-miR-497a-3p	chr11	70234770	70234790	+	21	0.570181	0.663052
mmu-miR-195a-5p	chr11	70235062	70235082	+	21	7.65238	7.55226
mmu-miR-195a-3p	chr11	70235100	70235121	+	22	4.51172	4.99647
mmu-miR-7115-5p	chr11	70438256	70438279	+	24	0	0
mmu-miR-7115-3p	chr11	70438297	70438318	+	22	0	0.663052
mmu-miR-6925-5p	chr11	70705995	70706016	+	22	0	0
mmu-miR-6925-3p	chr11	70706035	70706052	+	18	0.570181	0
mmu-miR-6338	chr11	72388765	72388785	+	21	0	0
mmu-miR-6926-5p	chr11	74868168	74868189	-	22	0	0
mmu-miR-6926-3p	chr11	74868127	74868147	-	21	0	0
mmu-miR-212-5p	chr11	75173403	75173425	+	23	2.54772	1.73713
mmu-miR-212-3p	chr11	75173443	75173464	+	22	3.2079	3.72814
mmu-miR-132-5p	chr11	75173686	75173707	+	22	1.77549	2.64405
mmu-miR-132-3p	chr11	75173723	75173744	+	22	3.76579	3.90711
mmu-miR-22-5p	chr11	75463734	75463755	+	22	3.13017	3.19661
mmu-miR-22-3p	chr11	75463772	75463793	+	22	14.7925	14.6141
mmu-miR-3971	chr11	75551480	75551501	+	22	0.570181	0
mmu-miR-423-5p	chr11	77078122	77078144	-	23	10.3117	10.26
mmu-miR-423-3p	chr11	77078086	77078108	-	23	11.6572	11.6743
mmu-miR-144-5p	chr11	78073010	78073032	+	23	1.55525	0
mmu-miR-144-3p	chr11	78073047	78073066	+	20	0.570181	0
mmu-miR-451a	chr11	78073186	78073207	+	22	1.55525	1.9698
mmu-miR-451b	chr11	78073219	78073239	-	21	0	0
mmu-miR-7653-5p	chr11	78178827	78178848	+	22	0.570181	1.1156
mmu-miR-7653-3p	chr11	78178866	78178887	+	22	1.29521	1.1156
mmu-miR-193a-5p	chr11	79711975	79711996	+	22	0.570181	0
mmu-miR-193a-3p	chr11	79712009	79712030	+	22	5.94459	5.7417
mmu-miR-365-2-5p	chr11	79726428	79726450	+	23	2.28619	2.17011
mmu-miR-365-3p	chr11	79726467	79726488	+	22	3.86511	4.01517
mmu-miR-7679-5p	chr11	82985046	82985065	-	20	0	0
mmu-miR-7679-3p	chr11	82985003	82985026	-	24	0	0
mmu-miR-5110	chr11	85760675	85760699	-	25	0	0
mmu-miR-21a-5p	chr11	86584120	86584141	-	22	11.5236	11.3153
mmu-miR-21a-3p	chr11	86584082	86584103	-	22	7.04299	6.87163
mmu-miR-301a-5p	chr11	87113017	87113038	+	22	4.93392	5.09826
mmu-miR-301a-3p	chr11	87113054	87113076	+	23	11.4438	11.399
mmu-miR-142b	chr11	87756906	87756925	-	20	0	0
mmu-miR-142a-5p	chr11	87756867	87756887	+	21	9.37522	8.15548
mmu-miR-142a-3p	chr11	87756903	87756925	+	23	6.92134	5.77282
mmu-miR-378b	chr11	88352839	88352858	+	20	3.13017	1.45958
mmu-miR-3063-5p	chr11	95963347	95963367	-	21	0	0
mmu-miR-3063-3p	chr11	95963304	95963325	-	22	4.51172	4.01517
mmu-miR-196a-5p	chr11	96265187	96265208	+	22	8.28849	8.11658
mmu-miR-196a-1-3p	chr11	96265225	96265246	+	22	5.59996	5.28255
mmu-miR-10a-5p	chr11	96317186	96317208	+	23	7.52529	7.21536
mmu-miR-10a-3p	chr11	96317227	96317248	+	22	0.570181	0
mmu-miR-152-5p	chr11	96850400	96850423	+	24	5.04399	4.63927
mmu-miR-152-3p	chr11	96850439	96850459	+	21	4.34968	4.38105
mmu-miR-8103	chr11	97063829	97063849	+	21	2.28619	1.73713
mmu-miR-7235-5p	chr11	97146402	97146419	-	18	0.570181	0
mmu-miR-7235-3p	chr11	97146364	97146386	-	23	1.55525	1.1156
mmu-miR-6927-5p	chr11	97677060	97677081	+	22	0	0
mmu-miR-6927-3p	chr11	97677106	97677126	+	21	0.570181	0.663052
mmu-miR-8102	chr11	97744974	97744995	+	22	0	0
mmu-miR-5119	chr11	98262638	98262656	+	19	0	0.663052
mmu-miR-7116-5p	chr11	100478455	100478475	-	21	0	0
mmu-miR-7116-3p	chr11	100478411	100478432	-	22	0	0
mmu-miR-6928-5p	chr11	101030345	101030367	+	23	0	0
mmu-miR-6928-3p	chr11	101030388	101030409	+	22	0.97777	0
mmu-miR-6929-5p	chr11	101419228	101419248	-	21	0	0
mmu-miR-6929-3p	chr11	101419187	101419209	-	23	0	0
mmu-miR-8101	chr11	102230103	102230124	-	22	0	0
mmu-miR-6930-5p	chr11	102404960	102404982	-	23	0	1.1156
mmu-miR-6930-3p	chr11	102404920	102404940	-	21	0	0
mmu-miR-6931-5p	chr11	102999896	102999916	-	21	0	0
mmu-miR-6931-3p	chr11	102999848	102999868	-	21	0.97777	0
mmu-miR-3064-5p	chr11	106782736	106782757	-	22	0	1.1156
mmu-miR-3064-3p	chr11	106782695	106782716	-	22	0.97777	0
mmu-miR-6932-5p	chr11	107637727	107637748	+	22	0.97777	0
mmu-miR-6932-3p	chr11	107637759	107637779	+	21	1.29521	0.663052
mmu-miR-7223-5p	chr11	107996848	107996867	+	20	0	0
mmu-miR-7223-3p	chr11	107996900	107996916	+	17	0	0
mmu-miR-3968	chr11	115447969	115447989	-	21	0	0
mmu-miR-5621-5p	chr11	115795824	115795846	+	23	0	0
mmu-miR-5621-3p	chr11	115795866	115795886	+	21	0	0.663052
mmu-miR-6516-5p	chr11	117077370	117077391	+	22	1.29521	1.1156
mmu-miR-6516-3p	chr11	117077412	117077433	+	22	1.77549	2.64405
mmu-miR-6933-5p	chr11	118002279	118002300	+	22	0.97777	1.1156
mmu-miR-6933-3p	chr11	118002324	118002343	+	20	0	0
mmu-miR-6934-5p	chr11	119154111	119154132	-	22	0	0
mmu-miR-6934-3p	chr11	119154076	119154097	-	22	0	0
mmu-miR-1932	chr11	119390524	119390545	+	22	0	0.663052
mmu-miR-338-5p	chr11	120014816	120014837	-	22	2.54772	1.45958
mmu-miR-338-3p	chr11	120014781	120014802	-	22	2.42288	2.17011
mmu-miR-3065-5p	chr11	120014780	120014801	+	22	0	0
mmu-miR-3065-3p	chr11	120014819	120014841	+	23	0	0
mmu-miR-6935-5p	chr11	120347387	120347408	-	22	0.570181	0.663052
mmu-miR-6935-3p	chr11	120347350	120347369	-	20	0.570181	1.45958
mmu-miR-6936-5p	chr11	120624856	120624876	-	21	0	0
mmu-miR-6936-3p	chr11	120624827	120624847	-	21	0.570181	0
mmu-miR-7236-5p	chr11	121387181	121387204	-	24	0	0
mmu-miR-7236-3p	chr11	121387145	121387166	-	22	0	0
mmu-miR-7675-5p	chr12	11299887	11299908	+	22	0	0
mmu-miR-7675-3p	chr12	11299924	11299944	+	21	0.570181	0
mmu-miR-6387	chr12	15801064	15801085	-	22	0	0
mmu-miR-3066-5p	chr12	17355404	17355425	+	22	3.41876	3.72814
mmu-miR-3066-3p	chr12	17355441	17355462	+	22	1.55525	1.45958
mmu-miR-6538	chr12	26414970	26414988	-	19	4.20551	6.18511
mmu-miR-6937-5p	chr12	28679325	28679348	+	24	0	0
mmu-miR-6937-3p	chr12	28679367	28679389	+	23	0	0
mmu-miR-680	chr12	35194849	35194869	-	21	0	0
mmu-miR-5099	chr12	36816250	36816269	+	20	12.1739	12.9282
mmu-miR-1938	chr12	40222782	40222803	-	22	0.97777	0.663052
mmu-miR-5627-5p	chr12	44210313	44210334	+	22	0	0
mmu-miR-5627-3p	chr12	44210350	44210373	+	24	1.29521	0
mmu-miR-1892	chr12	54645943	54645964	-	22	0	0
mmu-miR-681	chr12	69763923	69763943	-	21	0	0
mmu-miR-5101	chr12	75909154	75909175	+	22	0	0
mmu-miR-5135	chr12	76533143	76533166	-	24	0	0
mmu-miR-1843a-5p	chr12	80391654	80391674	-	21	4.31496	4.01517
mmu-miR-1843a-3p	chr12	80391615	80391636	-	22	0.97777	1.1156
mmu-miR-3067-5p	chr12	81166165	81166187	+	23	0.570181	0
mmu-miR-3067-3p	chr12	81166201	81166223	+	23	0	0
mmu-miR-6938-5p	chr12	85245958	85245980	-	23	0	0
mmu-miR-6938-3p	chr12	85245923	85245944	-	22	0	1.1156
mmu-miR-3068-5p	chr12	87437724	87437747	-	24	2.28619	1.73713
mmu-miR-3068-3p	chr12	87437685	87437706	-	22	5.73738	5.90512
mmu-miR-8099	chr12	93927373	93927393	+	21	0	0
mmu-miR-1190	chr12	101021692	101021713	-	22	0	1.1156
mmu-miR-1936	chr12	102684943	102684965	-	23	2.54772	2.34596
mmu-miR-3069-5p	chr12	105031117	105031140	-	24	1.55525	1.9698
mmu-miR-3069-3p	chr12	105031078	105031099	-	22	1.29521	1.1156
mmu-miR-342-5p	chr12	108658638	108658659	+	22	4.68483	4.73719
mmu-miR-342-3p	chr12	108658680	108658702	+	23	7.65585	7.54777
mmu-miR-345-5p	chr12	108836989	108837010	+	22	4.91086	4.99647
mmu-miR-345-3p	chr12	108837027	108837048	+	22	6.26865	6.35925
mmu-miR-1906	chr12	109544588	109544609	+	22	0	0
mmu-miR-770-5p	chr12	109563710	109563731	+	22	4.04533	4.49741
mmu-miR-770-3p	chr12	109563744	109563765	+	22	5.33133	4.94274
mmu-miR-673-5p	chr12	109572004	109572025	+	22	10.7718	10.7078
mmu-miR-673-3p	chr12	109572044	109572066	+	23	7.87126	7.43069
mmu-miR-493-5p	chr12	109580243	109580261	+	19	4.44907	4.94274
mmu-miR-493-3p	chr12	109580283	109580305	+	23	5.02264	4.88694
mmu-miR-337-5p	chr12	109585818	109585839	+	22	9.3878	9.37835
mmu-miR-337-3p	chr12	109585850	109585871	+	22	5.41566	5.34601
mmu-miR-3544-5p	chr12	109585851	109585873	-	23	0	0
mmu-miR-3544-3p	chr12	109585813	109585834	-	22	0	0
mmu-miR-540-5p	chr12	109586085	109586107	+	23	5.10622	5.34601
mmu-miR-540-3p	chr12	109586122	109586141	+	20	10.9643	10.7509
mmu-miR-665-5p	chr12	109586331	109586356	+	26	2.1352	1.9698
mmu-miR-665-3p	chr12	109586368	109586387	+	20	8.31727	8.40679
mmu-miR-3070-5p	chr12	109587959	109587981	+	23	0	0
mmu-miR-3070-3p	chr12	109587999	109588020	+	22	0.570181	0.663052
mmu-miR-3070-2-3p	chr12	109588648	109588669	+	22	0.570181	0
mmu-miR-431-5p	chr12	109590459	109590479	+	21	12.0779	12.1708
mmu-miR-431-3p	chr12	109590502	109590523	+	22	8.80078	8.56851
mmu-miR-433-5p	chr12	109591729	109591750	+	22	5.47974	5.80329
mmu-miR-433-3p	chr12	109591781	109591802	+	22	10.0973	10.1868
mmu-miR-127-5p	chr12	109592854	109592875	+	22	8.01065	8.08283
mmu-miR-127-3p	chr12	109592888	109592909	+	22	16.5088	16.4619
mmu-miR-434-5p	chr12	109594528	109594549	+	22	10.8546	11.1669
mmu-miR-434-3p	chr12	109594565	109594586	+	22	13.6423	13.7865
mmu-miR-432	chr12	109595006	109595028	+	23	0	0
mmu-miR-3071-5p	chr12	109595363	109595384	-	22	0	0
mmu-miR-3071-3p	chr12	109595329	109595350	-	22	0	0
mmu-miR-136-5p	chr12	109595331	109595352	+	22	9.11009	9.12909
mmu-miR-136-3p	chr12	109595366	109595387	+	22	11.8405	11.7629
mmu-miR-341-5p	chr12	109611521	109611541	+	21	7.52529	6.2194
mmu-miR-341-3p	chr12	109611556	109611576	+	21	11.6765	11.8373
mmu-miR-1188-5p	chr12	109611841	109611861	+	21	2.54772	2.34596
mmu-miR-1188-3p	chr12	109611877	109611901	+	25	0	0
mmu-miR-370-5p	chr12	109618270	109618289	+	20	6.43952	5.84781
mmu-miR-370-3p	chr12	109618305	109618326	+	22	9.53551	9.39969
mmu-miR-882	chr12	109682207	109682228	+	22	0	0
mmu-miR-379-5p	chr12	109709065	109709085	+	21	7.80401	7.93932
mmu-miR-379-3p	chr12	109709102	109709123	+	22	9.24067	9.09563
mmu-miR-411-5p	chr12	109710190	109710210	+	21	14.0698	13.9931
mmu-miR-411-3p	chr12	109710225	109710246	+	22	9.42286	9.34638
mmu-miR-299a-5p	chr12	109710644	109710665	+	22	6.45554	6.19663
mmu-miR-299a-3p	chr12	109710676	109710697	+	22	8.33903	8.16724
mmu-miR-299b-5p	chr12	109710673	109710693	-	21	0.97777	1.45958
mmu-miR-299b-3p	chr12	109710645	109710662	-	18	1.96653	1.1156
mmu-miR-380-5p	chr12	109711806	109711827	+	22	3.86511	3.44868
mmu-miR-380-3p	chr12	109711842	109711863	+	22	10.1762	10.3172
mmu-miR-1197-5p	chr12	109712361	109712381	+	21	0	0
mmu-miR-1197-3p	chr12	109712396	109712416	+	21	7.04299	7.39112
mmu-miR-323-5p	chr12	109712523	109712544	+	22	4.24293	4.42089
mmu-miR-323-3p	chr12	109712558	109712578	+	21	9.83712	10.0265
mmu-miR-758-5p	chr12	109712823	109712843	+	21	0	1.1156
mmu-miR-758-3p	chr12	109712858	109712876	+	19	11.7644	11.8608
mmu-miR-329-5p	chr12	109713503	109713524	+	22	7.50233	6.92801
mmu-miR-329-3p	chr12	109713541	109713562	+	22	6.42331	6.61249
mmu-miR-494-5p	chr12	109715334	109715355	+	22	4.38357	4.34007
mmu-miR-494-3p	chr12	109715367	109715388	+	22	8.52706	8.44835
mmu-miR-679-5p	chr12	109715587	109715608	+	22	7.82883	8.03228
mmu-miR-679-3p	chr12	109715624	109715645	+	22	3.35184	3.72814
mmu-miR-1193-5p	chr12	109715716	109715735	+	20	3.2079	3.59516
mmu-miR-1193-3p	chr12	109715750	109715770	+	21	6.43952	6.69604
mmu-miR-666-5p	chr12	109717103	109717124	+	22	9.64612	9.24876
mmu-miR-666-3p	chr12	109717140	109717161	+	22	8.50606	7.70932
mmu-miR-543-5p	chr12	109717269	109717289	+	21	3.71345	3.72814
mmu-miR-543-3p	chr12	109717304	109717325	+	22	8.99967	9.15294
mmu-miR-495-5p	chr12	109718757	109718779	+	23	2.42288	2.50269
mmu-miR-495-3p	chr12	109718795	109718816	+	22	7.93837	8.06722
mmu-miR-667-5p	chr12	109720020	109720044	+	25	4.48073	4.42089
mmu-miR-667-3p	chr12	109720061	109720083	+	23	8.6764	8.81642
mmu-miR-376c-5p	chr12	109722733	109722754	+	22	1.29521	2.34596
mmu-miR-376c-3p	chr12	109722770	109722790	+	21	7.95255	8.01611
mmu-miR-654-5p	chr12	109723235	109723256	+	22	0	0
mmu-miR-654-3p	chr12	109723270	109723291	+	22	0	0
mmu-miR-376b-5p	chr12	109723471	109723492	+	22	5.26012	5.23863
mmu-miR-376b-3p	chr12	109723508	109723528	+	21	9.91596	9.64229
mmu-miR-376a-5p	chr12	109723786	109723807	+	22	7.12543	7.12177
mmu-miR-376a-3p	chr12	109723824	109723844	+	21	7.43926	7.41598
mmu-miR-300-5p	chr12	109724318	109724339	+	22	2.66262	2.17011
mmu-miR-300-3p	chr12	109724363	109724384	+	22	12.519	12.5288
mmu-miR-381-5p	chr12	109726829	109726851	+	23	1.55525	1.45958
mmu-miR-381-3p	chr12	109726870	109726891	+	22	12.3082	12.124
mmu-miR-487b-5p	chr12	109727347	109727367	+	21	3.048	1.1156
mmu-miR-487b-3p	chr12	109727382	109727403	+	22	8.68492	8.91038
mmu-miR-539-5p	chr12	109728136	109728157	+	22	4.60087	4.79897
mmu-miR-539-3p	chr12	109728176	109728197	+	22	4.20551	4.49741
mmu-miR-544-5p	chr12	109729335	109729355	+	21	0.97777	0
mmu-miR-544-3p	chr12	109729371	109729392	+	22	1.96653	1.73713
mmu-miR-382-5p	chr12	109733781	109733802	+	22	7.57013	7.70932
mmu-miR-382-3p	chr12	109733819	109733840	+	22	6.30448	6.51462
mmu-miR-134-5p	chr12	109734145	109734166	+	22	9.87037	9.95031
mmu-miR-134-3p	chr12	109734184	109734203	+	20	3.76579	3.44868
mmu-miR-668-5p	chr12	109734733	109734756	+	24	1.29521	0
mmu-miR-668-3p	chr12	109734774	109734797	+	24	6.86246	7.18676
mmu-miR-485-5p	chr12	109734910	109734931	+	22	7.16495	7.19253
mmu-miR-485-3p	chr12	109734946	109734967	+	22	8.42496	8.57955
mmu-miR-453	chr12	109735669	109735692	+	24	0	0
mmu-miR-154-5p	chr12	109738438	109738459	+	22	5.47974	5.61003
mmu-miR-154-3p	chr12	109738474	109738495	+	22	4.88742	5.0226
mmu-miR-496a-5p	chr12	109739132	109739152	+	21	0.97777	0.663052
mmu-miR-496a-3p	chr12	109739165	109739186	+	22	6.13573	6.5238
mmu-miR-377-5p	chr12	109740515	109740536	+	22	6.15548	5.87675
mmu-miR-377-3p	chr12	109740553	109740574	+	22	7.6172	7.7372
mmu-miR-541-5p	chr12	109742422	109742446	+	25	14.7137	14.6709
mmu-miR-541-3p	chr12	109742466	109742487	+	22	1.29521	3.00021
mmu-miR-409-5p	chr12	109743172	109743194	+	23	7.33917	6.36947
mmu-miR-409-3p	chr12	109743204	109743225	+	22	12.7895	12.9473
mmu-miR-412-5p	chr12	109743303	109743325	+	23	5.36565	5.57514
mmu-miR-412-3p	chr12	109743340	109743359	+	20	3.95803	4.57008
mmu-miR-369-5p	chr12	109743431	109743452	+	22	8.19852	8.39434
mmu-miR-369-3p	chr12	109743466	109743486	+	21	8.86818	8.96361
mmu-miR-410-5p	chr12	109743729	109743749	+	21	3.95803	3.72814
mmu-miR-410-3p	chr12	109743764	109743784	+	21	13.5639	13.588
mmu-miR-3072-5p	chr12	109747893	109747914	+	22	3.048	2.17011
mmu-miR-3072-3p	chr12	109747928	109747949	+	22	4.81474	4.2979
mmu-miR-1247-5p	chr12	110278094	110278115	-	22	2.86814	2.89098
mmu-miR-1247-3p	chr12	110278058	110278078	-	21	1.55525	2.17011
mmu-miR-3073a-5p	chr12	112109252	112109273	+	22	0.570181	0
mmu-miR-3073a-3p	chr12	112109290	112109311	+	22	1.55525	1.45958
mmu-miR-3073b-5p	chr12	112109288	112109309	-	22	0	0
mmu-miR-3073b-3p	chr12	112109250	112109271	-	22	0	0
mmu-miR-203-5p	chr12	112130889	112130910	+	22	0.97777	0.663052
mmu-miR-203-3p	chr12	112130927	112130948	+	22	5.20432	5.21617
mmu-miR-6939-5p	chr12	112659327	112659347	-	21	0	0
mmu-miR-6939-3p	chr12	112659277	112659296	-	20	0.570181	0.663052
mmu-miR-6940-5p	chr12	112733328	112733350	+	23	0.570181	0
mmu-miR-6940-3p	chr12	112733369	112733391	+	23	0	0.663052
mmu-miR-6941-5p	chr12	112920515	112920535	-	21	0	0
mmu-miR-6941-3p	chr12	112920483	112920503	-	21	0.570181	0
mmu-miR-7094-1-5p	chr12	114469444	114469466	-	23	0	0
mmu-miR-7094-3p	chr12	114469408	114469428	-	21	0	0
mmu-miR-7094b-2-5p	chr12	114513672	114513694	-	23	0	0
mmu-miR-6388	chr12	115695773	115695793	-	21	0	0
mmu-miR-153-5p	chr12	117250827	117250843	+	17	0	0
mmu-miR-153-3p	chr12	117250860	117250881	+	22	1.55525	1.9698
mmu-miR-466i-5p	chr13	17747525	17747544	+	20	0	0
mmu-miR-466i-3p	chr13	17747552	17747573	+	22	0	0
mmu-miR-6942-5p	chr13	21396613	21396633	-	21	0	0
mmu-miR-6942-3p	chr13	21396579	21396600	-	22	0	0
mmu-miR-1896	chr13	21445209	21445230	+	22	0	0
mmu-miR-1983	chr13	21896930	21896950	-	21	9.19963	9.48204
mmu-miR-6368	chr13	28710796	28710816	-	21	0	0
mmu-miR-5124a	chr13	40865801	40865820	+	20	0	0
mmu-let-7d-5p	chr13	48536078	48536099	-	22	5.47974	5.48405
mmu-let-7d-3p	chr13	48536024	48536045	-	22	5.41566	5.77282
mmu-let-7f-5p	chr13	48537889	48537910	-	22	9.09098	9.2194
mmu-let-7f-1-3p	chr13	48537833	48537854	-	22	0.570181	1.1156
mmu-let-7a-5p	chr13	48538239	48538260	-	22	7.0848	7.34008
mmu-let-7a-1-3p	chr13	48538188	48538209	-	22	2.66262	2.50269
mmu-miR-683	chr13	50544644	50544664	-	21	0	0
mmu-miR-6943-5p	chr13	55453111	55453130	+	20	0	0
mmu-miR-6943-3p	chr13	55453150	55453171	+	22	1.55525	1.45958
mmu-miR-6944-5p	chr13	55477754	55477776	-	23	0.570181	0
mmu-miR-6944-3p	chr13	55477681	55477703	-	23	8.78184	9.16472
mmu-miR-6945-5p	chr13	55507667	55507688	-	22	0	0
mmu-miR-6945-3p	chr13	55507627	55507647	-	21	0.97777	0.663052
mmu-miR-874-5p	chr13	58023170	58023191	-	22	2.1352	1.1156
mmu-miR-874-3p	chr13	58023135	58023156	-	22	4.88742	3.96215
mmu-miR-6369	chr13	58313119	58313141	-	23	0	0
mmu-miR-7a-5p	chr13	58392841	58392863	-	23	6.87443	6.76732
mmu-miR-7a-1-3p	chr13	58392800	58392821	-	22	4.24293	4.73719
mmu-miR-713	chr13	62760807	62760825	+	19	0	0
mmu-miR-23b-5p	chr13	63300492	63300512	+	21	1.77549	1.1156
mmu-miR-23b-3p	chr13	63300529	63300549	+	21	8.31727	8.74367
mmu-miR-27b-5p	chr13	63300718	63300739	+	22	6.91556	7.60077
mmu-miR-27b-3p	chr13	63300760	63300780	+	21	14.0646	14.2108
mmu-miR-3074-5p	chr13	63301249	63301270	-	22	3.41876	3.00021
mmu-miR-3074-1-3p	chr13	63301211	63301232	-	22	2.54772	2.77279
mmu-miR-24-1-5p	chr13	63301213	63301235	+	23	2.1352	0
mmu-miR-24-3p	chr13	63301251	63301272	+	22	8.11522	7.91163
mmu-miR-466f	chr13	71107108	71107129	+	22	4.57176	3.28561
mmu-miR-692	chr13	74407121	74407141	+	21	1.55525	3.66318
mmu-miR-682	chr13	75645119	75645139	+	21	0.97777	3.00021
mmu-miR-3961	chr13	82698278	82698296	-	19	0	0
mmu-miR-9-5p	chr13	83738821	83738843	+	23	8.1648	8.15548
mmu-miR-9-3p	chr13	83738858	83738879	+	22	2.1352	1.9698
mmu-miR-5624-5p	chr13	93790777	93790794	+	18	0	0.663052
mmu-miR-5624-3p	chr13	93790816	93790837	+	22	0	0
mmu-miR-582-5p	chr13	109324753	109324774	+	22	5.34859	5.50273
mmu-miR-582-3p	chr13	109324790	109324810	+	21	8.90365	8.65248
mmu-miR-1904	chr13	109903819	109903840	+	22	0	0
mmu-miR-449c-5p	chr13	113036008	113036028	+	21	3.35184	2.64405
mmu-miR-449c-3p	chr13	113036049	113036070	+	22	0	0
mmu-miR-449b	chr13	113037429	113037448	+	20	0	0
mmu-miR-449a-5p	chr13	113037549	113037570	+	22	2.28619	1.9698
mmu-miR-449a-3p	chr13	113037589	113037610	+	22	0.570181	0
mmu-miR-5124b	chr14	11282482	11282502	+	21	0	0
mmu-miR-6946-5p	chr14	20690640	20690660	+	21	0	0
mmu-miR-6946-3p	chr14	20690684	20690703	+	20	1.55525	0.663052
mmu-miR-7210-5p	chr14	24088877	24088899	+	23	0	0
mmu-miR-7210-3p	chr14	24088907	24088930	+	24	0	0
mmu-miR-3075-5p	chr14	25534451	25534471	+	21	0	0
mmu-miR-3075-3p	chr14	25534491	25534511	+	21	0	0
mmu-miR-7672-5p	chr14	26669587	26669608	-	22	0	0
mmu-miR-7672-3p	chr14	26669547	26669567	-	21	0	0
mmu-miR-6947-5p	chr14	29988893	29988913	+	21	0	0
mmu-miR-6947-3p	chr14	29988930	29988951	+	22	0	0
mmu-miR-3076-5p	chr14	30572150	30572173	+	24	1.29521	0.663052
mmu-miR-3076-3p	chr14	30572185	30572207	+	23	3.2079	3.10175
mmu-miR-346-5p	chr14	34894624	34894646	+	23	1.55525	1.1156
mmu-miR-346-3p	chr14	34894662	34894683	+	22	0	0
mmu-miR-327	chr14	44947483	44947501	-	19	0	0
mmu-miR-5131	chr14	45657972	45657994	-	23	0	0
mmu-miR-378c	chr14	46954905	46954925	-	21	6.92134	6.64649
mmu-miR-686	chr14	54616746	54616767	-	22	0.570181	0
mmu-miR-6948-5p	chr14	54643084	54643105	-	22	0	0
mmu-miR-6948-3p	chr14	54643050	54643070	-	21	2.42288	3.10175
mmu-miR-208a-5p	chr14	54949107	54949128	-	22	0	0
mmu-miR-208a-3p	chr14	54949072	54949093	-	22	2.96087	2.50269
mmu-miR-208b-5p	chr14	54975745	54975766	-	22	0	0
mmu-miR-208b-3p	chr14	54975710	54975731	-	22	0.97777	0.663052
mmu-miR-6949-5p	chr14	56082441	56082463	-	23	0	0
mmu-miR-6949-3p	chr14	56082401	56082421	-	21	0	0
mmu-miR-3077-5p	chr14	57798424	57798448	+	25	0.570181	0.663052
mmu-miR-3077-3p	chr14	57798466	57798487	+	22	2.54772	1.73713
mmu-miR-719	chr14	60228873	60228894	-	22	0	0
mmu-miR-16-5p	chr14	61631936	61631957	-	22	13.8342	13.7099
mmu-miR-16-1-3p	chr14	61631894	61631915	-	22	4.91086	5.23863
mmu-miR-15a-5p	chr14	61632075	61632096	-	22	8.29741	8.33563
mmu-miR-15a-3p	chr14	61632038	61632059	-	22	3.76579	3.28561
mmu-miR-8098	chr14	62837797	62837817	+	21	0.570181	0.663052
mmu-miR-6541	chr14	62865610	62865630	+	21	0	0
mmu-miR-598-5p	chr14	63727199	63727221	+	23	0.570181	0
mmu-miR-598-3p	chr14	63727236	63727257	+	22	3.76579	4.01517
mmu-miR-124-5p	chr14	64590670	64590691	+	22	4.71176	5.52118
mmu-miR-124-3p	chr14	64590709	64590728	+	20	7.4946	7.53875
mmu-miR-3078-5p	chr14	64591200	64591222	+	23	6.09539	6.11398
mmu-miR-3078-3p	chr14	64591239	64591258	+	20	0.570181	1.1156
mmu-miR-6539	chr14	67859699	67859722	-	24	9.31721	9.36947
mmu-miR-6950-5p	chr14	69692253	69692275	+	23	0	0
mmu-miR-6950-3p	chr14	69692293	69692313	+	21	0	0
mmu-miR-320-5p	chr14	70443525	70443546	+	22	0.570181	1.1156
mmu-miR-320-3p	chr14	70443557	70443578	+	22	8.53463	8.75735
mmu-miR-687	chr14	73206808	73206829	-	22	0	0
mmu-miR-1971	chr14	78191451	78191468	-	18	0	0
mmu-miR-759	chr14	79738460	79738481	+	22	0	0
mmu-miR-5130	chr14	102982608	102982631	-	24	0	0
mmu-miR-6390	chr14	105623710	105623730	-	21	0	0
mmu-miR-17-5p	chr14	115043684	115043706	+	23	10.798	10.8482
mmu-miR-17-3p	chr14	115043721	115043742	+	22	7.53663	7.71334
mmu-miR-18a-5p	chr14	115043867	115043889	+	23	8.9468	9.00188
mmu-miR-18a-3p	chr14	115043908	115043929	+	22	6.99446	7.06003
mmu-miR-19a-5p	chr14	115044012	115044033	+	22	3.91232	4.25447
mmu-miR-19a-3p	chr14	115044048	115044070	+	23	8.59736	8.63988
mmu-miR-20a-5p	chr14	115044183	115044205	+	23	9.77622	9.94177
mmu-miR-20a-3p	chr14	115044219	115044240	+	22	5.58547	6.39969
mmu-miR-19b-3p	chr14	115044358	115044380	+	23	10.4451	10.5579
mmu-miR-19b-1-5p	chr14	115044320	115044342	+	23	2.42288	3.00021
mmu-miR-92a-3p	chr14	115044476	115044496	+	21	16.5122	16.6032
mmu-miR-92a-1-5p	chr14	115044437	115044459	+	23	10.7553	11.4429
mmu-miR-6239	chr14	117953768	117953787	-	20	2.1352	1.73713
mmu-miR-6241	chr14	118258659	118258677	+	19	0	0
mmu-miR-6391	chr14	118592376	118592396	-	21	0	0
mmu-miR-1898	chr15	12171502	12171523	+	22	0	0
mmu-miR-7212-5p	chr15	25948227	25948247	+	21	0	0
mmu-miR-7212-3p	chr15	25948267	25948287	+	21	0	0
mmu-miR-7117-5p	chr15	27571499	27571520	+	22	0	0
mmu-miR-7117-3p	chr15	27571539	27571558	+	20	0	0
mmu-miR-3964	chr15	29713337	29713356	-	20	0	0
mmu-miR-599	chr15	35660846	35660864	-	19	0	0
mmu-miR-875-5p	chr15	35661016	35661037	-	22	0	0
mmu-miR-875-3p	chr15	35660982	35661002	-	21	0	0
mmu-miR-8097	chr15	36240113	36240134	-	22	0	0
mmu-miR-6951-5p	chr15	38490522	38490542	-	21	0.570181	0
mmu-miR-6951-3p	chr15	38490473	38490493	-	21	0	0
mmu-miR-1907	chr15	50889035	50889056	-	22	0	0
mmu-miR-28c	chr15	53614216	53614235	-	20	0.97777	1.1156
mmu-miR-30b-5p	chr15	68337469	68337490	-	22	9.13144	8.85692
mmu-miR-30b-3p	chr15	68337431	68337452	-	22	5.14626	4.82889
mmu-miR-30d-5p	chr15	68341257	68341278	-	22	11.9969	11.739
mmu-miR-30d-3p	chr15	68341217	68341238	-	22	6.86846	6.75178
mmu-miR-151-5p	chr15	73254855	73254875	-	21	10.9748	10.8914
mmu-miR-151-3p	chr15	73254820	73254840	-	21	12.5893	12.3394
mmu-miR-6952-5p	chr15	76064862	76064883	-	22	0.570181	0.663052
mmu-miR-6952-3p	chr15	76064828	76064849	-	22	1.55525	2.34596
mmu-miR-1942	chr15	76215621	76215641	-	21	0	0
mmu-miR-6953-5p	chr15	76248196	76248221	+	26	0	0
mmu-miR-6953-3p	chr15	76248235	76248258	+	24	0.570181	0
mmu-miR-3079-5p	chr15	76290932	76290954	-	23	0.570181	1.9698
mmu-miR-3079-3p	chr15	76290891	76290911	-	21	1.29521	1.1156
mmu-miR-6954-5p	chr15	76433219	76433240	+	22	0	0
mmu-miR-6954-3p	chr15	76433253	76433273	+	21	0	0
mmu-miR-7676-5p	chr15	78284827	78284849	-	23	0	0
mmu-miR-7676-3p	chr15	78284788	78284809	-	22	0	0
mmu-miR-6955-5p	chr15	78891845	78891868	+	24	0.570181	0.663052
mmu-miR-6955-3p	chr15	78891891	78891912	+	22	0	0
mmu-miR-6956-5p	chr15	79002231	79002250	+	20	0	0
mmu-miR-6956-3p	chr15	79002265	79002284	+	20	0.570181	0.663052
mmu-miR-1943-5p	chr15	79375271	79375293	-	23	3.95803	4.25447
mmu-miR-1943-3p	chr15	79375236	79375256	-	21	2.1352	1.45958
mmu-miR-7213-5p	chr15	79999007	79999026	-	20	0	0
mmu-miR-7213-3p	chr15	79998970	79998989	-	20	0	0
mmu-miR-6957-5p	chr15	80646078	80646098	+	21	0	0
mmu-miR-6957-3p	chr15	80646113	80646134	+	22	0	0
mmu-miR-5113	chr15	80940049	80940071	+	23	1.77549	1.1156
mmu-miR-33-5p	chr15	82198127	82198147	+	21	5.9217	6.26389
mmu-miR-33-3p	chr15	82198167	82198188	+	22	2.54772	3.59516
mmu-miR-7684-5p	chr15	82393958	82393978	-	21	0	0
mmu-miR-7684-3p	chr15	82393919	82393940	-	22	0	0
mmu-miR-3080-5p	chr15	82959266	82959285	-	20	0	0
mmu-miR-3080-3p	chr15	82959228	82959249	-	22	0	0
mmu-miR-6392-5p	chr15	84168285	84168307	+	23	0.570181	0
mmu-miR-6392-3p	chr15	84168334	84168356	+	23	0	0
mmu-miR-1249-5p	chr15	84951579	84951603	-	25	0.570181	0.663052
mmu-miR-1249-3p	chr15	84951545	84951566	-	22	5.14626	4.25447
mmu-let-7c-5p	chr15	85706616	85706637	+	22	6.33944	5.97369
mmu-let-7c-2-3p	chr15	85706664	85706685	+	22	2.66262	2.50269
mmu-let-7b-5p	chr15	85707325	85707346	+	22	0.97777	1.45958
mmu-let-7b-3p	chr15	85707379	85707400	+	22	0.97777	0
mmu-miR-6393	chr15	87795919	87795940	-	22	0	0
mmu-miR-7118-5p	chr15	89162882	89162903	-	22	0	0
mmu-miR-7118-3p	chr15	89162849	89162870	-	22	0.97777	0
mmu-miR-6958-5p	chr15	89185516	89185537	-	22	0	0
mmu-miR-6958-3p	chr15	89185465	89185487	-	23	2.54772	3.00021
mmu-miR-6959-5p	chr15	89305705	89305727	-	23	0.570181	0
mmu-miR-6959-3p	chr15	89305658	89305679	-	22	0	0
mmu-miR-7648-5p	chr15	90224360	90224379	+	20	0	1.45958
mmu-miR-7648-3p	chr15	90224392	90224412	+	21	0.97777	0.663052
mmu-miR-1291	chr15	98519828	98519853	-	26	1.96653	2.77279
mmu-miR-6960-5p	chr15	99080810	99080831	+	22	2.54772	1.9698
mmu-miR-6960-3p	chr15	99080844	99080865	+	22	0	0
mmu-miR-6961-5p	chr15	100649205	100649224	-	20	0	0
mmu-miR-6961-3p	chr15	100649163	100649184	-	22	0	0
mmu-miR-6962-5p	chr15	101193874	101193893	+	20	0	0.663052
mmu-miR-6962-3p	chr15	101193908	101193929	+	22	0.97777	0
mmu-miR-1941-5p	chr15	101369364	101369387	+	24	0.97777	0
mmu-miR-1941-3p	chr15	101369401	101369421	+	21	0	0
mmu-miR-688	chr15	102671802	102671821	-	20	0	0
mmu-miR-196a-2-3p	chr15	102973401	102973422	+	22	0	0
mmu-miR-615-5p	chr15	103014926	103014947	+	22	0	0.663052
mmu-miR-615-3p	chr15	103014969	103014990	+	22	0.570181	0.663052
mmu-miR-148b-5p	chr15	103285148	103285171	+	24	7.3984	7.63505
mmu-miR-148b-3p	chr15	103285185	103285206	+	22	10.5444	10.5784
mmu-miR-6963-5p	chr15	103350497	103350520	-	24	0	0
mmu-miR-6963-3p	chr15	103350455	103350477	-	23	0.97777	1.1156
mmu-miR-6364	chr16	5215790	5215811	-	22	0	0
mmu-miR-1945	chr16	11254381	11254402	-	22	2.28619	2.64405
mmu-miR-193b-5p	chr16	13449533	13449554	+	22	1.55525	0
mmu-miR-193b-3p	chr16	13449570	13449591	+	22	5.04399	5.17015
mmu-miR-365-1-5p	chr16	13453855	13453877	+	23	0.570181	0
mmu-miR-6365	chr16	13471103	13471124	-	22	0	0
mmu-miR-484	chr16	14159630	14159651	+	22	10.2043	10.4061
mmu-miR-130b-5p	chr16	17124109	17124130	-	22	8.68322	8.84964
mmu-miR-130b-3p	chr16	17124071	17124092	-	22	11.7261	11.8262
mmu-miR-301b-5p	chr16	17124456	17124477	-	22	4.20551	4.20968
mmu-miR-301b-3p	chr16	17124420	17124442	-	23	9.79445	9.80262
mmu-miR-6366	chr16	18165093	18165114	-	22	0	0
mmu-miR-1306-3p	chr16	18284248	18284268	-	21	3.28166	3.19661
mmu-miR-1306-5p	chr16	18284288	18284310	-	23	4.51172	4.60509
mmu-miR-3618-5p	chr16	18284602	18284623	-	22	0.570181	0
mmu-miR-3618-3p	chr16	18284562	18284583	-	22	0	0
mmu-miR-185-5p	chr16	18327438	18327459	-	22	3.48271	3.59516
mmu-miR-185-3p	chr16	18327405	18327425	-	21	3.71345	2.89098
mmu-miR-1224-5p	chr16	20604452	20604472	+	21	1.96653	1.1156
mmu-miR-1224-3p	chr16	20604516	20604536	+	21	0	0
mmu-miR-7680-5p	chr16	21256047	21256066	-	20	0	0
mmu-miR-7680-3p	chr16	21256013	21256034	-	22	0	0
mmu-miR-8095	chr16	22532128	22532149	-	22	0	0
mmu-miR-6362	chr16	22605342	22605363	+	22	0	0
mmu-miR-28a-5p	chr16	24827868	24827889	+	22	8.04812	7.9799
mmu-miR-28a-3p	chr16	24827908	24827929	+	22	6.66987	6.39969
mmu-miR-690	chr16	28599940	28599961	-	22	0	0
mmu-miR-1946a	chr16	32267540	32267566	-	27	0	0
mmu-miR-1947-5p	chr16	33105375	33105396	+	22	5.38252	5.70989
mmu-miR-1947-3p	chr16	33105411	33105432	+	22	0.97777	1.1156
mmu-miR-6540-5p	chr16	42303425	42303446	-	22	3.48271	3.28561
mmu-miR-6540-3p	chr16	42303386	42303406	-	21	0.97777	1.1156
mmu-miR-568	chr16	43640665	43640684	+	20	0	0
mmu-miR-3470b	chr16	44013885	44013905	+	21	0	0
mmu-miR-3081-5p	chr16	44558092	44558114	-	23	0	0
mmu-miR-3081-3p	chr16	44558058	44558080	-	23	2.1352	0
mmu-miR-6363	chr16	50727204	50727225	+	22	0	0
mmu-miR-5118	chr16	55494770	55494788	+	19	0	0
mmu-miR-691	chr16	74342005	74342026	-	22	0	0
mmu-miR-99a-5p	chr16	77598940	77598961	+	22	0	0
mmu-miR-99a-3p	chr16	77598977	77598997	+	21	0	0
mmu-let-7c-1-3p	chr16	77599717	77599738	+	22	0	0
mmu-miR-125b-5p	chr16	77646279	77646300	+	22	4.51172	4.57008
mmu-miR-125b-2-3p	chr16	77646318	77646339	+	22	0.97777	0
mmu-miR-155-5p	chr16	84714143	84714165	+	23	5.83861	6.05189
mmu-miR-155-3p	chr16	84714182	84714202	+	21	1.55525	1.9698
mmu-miR-6367	chr16	91527468	91527489	-	22	0	0
mmu-miR-802-5p	chr16	93369737	93369758	+	22	0	0
mmu-miR-802-3p	chr16	93369775	93369796	+	22	0	0
mmu-miR-6964-5p	chr16	97877266	97877286	-	21	0	0
mmu-miR-6964-3p	chr16	97877233	97877252	-	20	0	0
mmu-miR-99b-5p	chr17	17830194	17830215	+	22	11.2906	11.0944
mmu-miR-99b-3p	chr17	17830232	17830253	+	22	6.97235	6.9554
mmu-let-7e-5p	chr17	17830366	17830387	+	22	6.59227	6.37961
mmu-let-7e-3p	chr17	17830411	17830432	+	22	2.28619	3.10175
mmu-miR-125a-5p	chr17	17830817	17830840	+	24	10.9174	10.8168
mmu-miR-125a-3p	chr17	17830855	17830876	+	22	5.18522	4.82889
mmu-miR-5125	chr17	23823339	23823358	+	20	0	0
mmu-miR-5134-5p	chr17	24234575	24234595	-	21	0	0
mmu-miR-5134-3p	chr17	24234535	24234556	-	22	0	0
mmu-miR-6965-5p	chr17	24240919	24240942	-	24	0	0
mmu-miR-6965-3p	chr17	24240884	24240905	-	22	0.570181	0.663052
mmu-miR-3547-5p	chr17	25245614	25245638	-	25	0	0
mmu-miR-3547-3p	chr17	25245551	25245571	-	21	0	0.663052
mmu-miR-6966-5p	chr17	25780813	25780833	+	21	0	0
mmu-miR-6966-3p	chr17	25780859	25780879	+	21	0.570181	1.73713
mmu-miR-3082-5p	chr17	25831406	25831427	-	22	0	0.663052
mmu-miR-3082-3p	chr17	25831366	25831387	-	22	4.1671	3.7903
mmu-miR-6967-5p	chr17	26920967	26920987	+	21	0.97777	1.1156
mmu-miR-6967-3p	chr17	26921000	26921019	+	20	3.048	1.9698
mmu-miR-6968-5p	chr17	26935472	26935493	+	22	0	0
mmu-miR-6968-3p	chr17	26935518	26935539	+	22	0	0
mmu-miR-3083-5p	chr17	26948093	26948114	-	22	0.570181	0.663052
mmu-miR-3083-3p	chr17	26948058	26948079	-	22	0	0
mmu-miR-7677-5p	chr17	27091245	27091269	+	25	0	0
mmu-miR-7677-3p	chr17	27091289	27091311	+	23	3.048	1.45958
mmu-miR-7214-5p	chr17	27317073	27317095	-	23	0	0
mmu-miR-7214-3p	chr17	27317035	27317058	-	24	0	0
mmu-miR-7216-5p	chr17	27328385	27328408	+	24	0	0
mmu-miR-7216-3p	chr17	27328440	27328460	+	21	0	0
mmu-miR-7217-5p	chr17	27355738	27355762	+	25	0	0
mmu-miR-7217-3p	chr17	27355778	27355799	+	22	0	0
mmu-miR-7218-5p	chr17	27358097	27358117	+	21	0	0
mmu-miR-7218-3p	chr17	27358132	27358155	+	24	0	0
mmu-miR-6969-5p	chr17	28558475	28558496	-	22	0	0
mmu-miR-6969-3p	chr17	28558441	28558460	-	20	0	0
mmu-miR-7667-5p	chr17	29595538	29595559	+	22	0	0
mmu-miR-7667-3p	chr17	29595579	29595600	+	22	1.77549	1.45958
mmu-miR-219a-5p	chr17	34025052	34025072	-	21	2.66262	2.89098
mmu-miR-219a-1-3p	chr17	34025010	34025031	-	22	3.91232	4.49741
mmu-miR-219c-5p	chr17	34025012	34025033	+	22	0.570181	1.45958
mmu-miR-219c-3p	chr17	34025050	34025071	+	22	1.55525	1.45958
mmu-miR-6971-5p	chr17	34841847	34841866	-	20	0	0
mmu-miR-6971-3p	chr17	34841809	34841829	-	21	0.97777	0.663052
mmu-miR-6970-5p	chr17	34845143	34845167	-	25	0.570181	0.663052
mmu-miR-6970-3p	chr17	34845104	34845124	-	21	0.570181	0
mmu-miR-6972-5p	chr17	34857605	34857627	-	23	0	0
mmu-miR-6972-3p	chr17	34857569	34857589	-	21	0	0
mmu-miR-6973a-5p	chr17	35194977	35194998	+	22	0	0
mmu-miR-6973a-3p	chr17	35195024	35195045	+	22	0	0.663052
mmu-miR-6974-5p	chr17	35204534	35204557	-	24	0	0
mmu-miR-6974-3p	chr17	35204475	35204496	-	22	0	0
mmu-miR-6975-5p	chr17	35244080	35244102	+	23	0.570181	0
mmu-miR-6975-3p	chr17	35244116	35244135	+	20	0.570181	2.17011
mmu-miR-8094	chr17	35251314	35251334	+	21	2.1352	3.28561
mmu-miR-1894-5p	chr17	35917899	35917920	+	22	0	0
mmu-miR-1894-3p	chr17	35917938	35917959	+	22	0	0
mmu-miR-877-5p	chr17	35960795	35960814	-	20	7.95818	8.27714
mmu-miR-877-3p	chr17	35960731	35960752	-	22	6.10558	6.2194
mmu-miR-693-5p	chr17	46231551	46231571	+	21	0.570181	0
mmu-miR-693-3p	chr17	46231581	46231603	+	23	3.048	2.89098
mmu-miR-6976-5p	chr17	46553862	46553884	-	23	0	0
mmu-miR-6976-3p	chr17	46553827	46553847	-	21	0.570181	0.663052
mmu-miR-7b-5p	chr17	56243017	56243039	+	23	0.570181	1.45958
mmu-miR-7b-3p	chr17	56243055	56243076	+	22	0	0
mmu-miR-6977-5p	chr17	56418885	56418909	-	25	0	0
mmu-miR-6977-3p	chr17	56418850	56418871	-	22	0.570181	0
mmu-miR-6978-5p	chr17	57217201	57217223	-	23	0	0
mmu-miR-6978-3p	chr17	57217172	57217194	-	23	0	0
mmu-miR-6420	chr17	64440863	64440883	+	21	0	0
mmu-miR-5709-5p	chr17	67026197	67026218	-	22	0	0
mmu-miR-5709-3p	chr17	67026162	67026183	-	22	0	0
mmu-miR-1195	chr17	70860558	70860580	-	23	1.29521	0
mmu-miR-1893	chr18	6490574	6490595	-	22	0.570181	0
mmu-miR-133a-5p	chr18	10782950	10782970	-	21	0	0
mmu-miR-133a-3p	chr18	10782913	10782934	-	22	2.54772	2.50269
mmu-miR-1b-5p	chr18	10785486	10785506	+	21	0	0
mmu-miR-1b-3p	chr18	10785525	10785547	+	23	0.570181	1.1156
mmu-miR-1a-2-5p	chr18	10785523	10785545	-	23	0	0
mmu-miR-1a-3p	chr18	10785485	10785506	-	22	0	0
mmu-miR-1901	chr18	11840371	11840392	-	22	0	0
mmu-miR-1948-5p	chr18	12714825	12714845	+	21	0	0
mmu-miR-1948-3p	chr18	12714862	12714883	+	22	0	0
mmu-miR-6360	chr18	23774938	23774959	-	22	0	0
mmu-miR-187-5p	chr18	24429147	24429168	-	22	0.97777	1.9698
mmu-miR-187-3p	chr18	24429110	24429131	-	22	5.24176	5.46512
mmu-miR-6361	chr18	32880574	32880596	-	23	0	0
mmu-miR-1949	chr18	35554612	35554635	+	24	4.78968	4.88694
mmu-miR-6979-5p	chr18	37854641	37854660	-	20	0	0
mmu-miR-6979-3p	chr18	37854605	37854625	-	21	0	1.1156
mmu-miR-6981-5p	chr18	37974592	37974617	-	26	0	0
mmu-miR-6981-3p	chr18	37974503	37974524	-	22	0.97777	0
mmu-miR-6980-5p	chr18	37990919	37990940	-	22	0	0
mmu-miR-6980-3p	chr18	37990887	37990906	-	20	0	0.663052
mmu-miR-1258-5p	chr18	56538139	56538160	+	22	3.48271	3.19661
mmu-miR-1258-3p	chr18	56538177	56538198	+	22	0.570181	0.663052
mmu-miR-6355	chr18	59579646	59579666	+	21	0	0
mmu-miR-5107-5p	chr18	60812086	60812106	+	21	0	0.663052
mmu-miR-5107-3p	chr18	60812130	60812151	+	22	0	0.663052
mmu-miR-7220-5p	chr18	60953873	60953894	+	22	1.77549	1.9698
mmu-miR-7220-3p	chr18	60953910	60953932	+	23	0	0
mmu-miR-6982-5p	chr18	60958078	60958102	+	25	0	0
mmu-miR-6982-3p	chr18	60958120	60958140	+	21	0	0
mmu-miR-6983-5p	chr18	61117473	61117494	+	22	0	0
mmu-miR-6983-3p	chr18	61117509	61117531	+	23	0	0
mmu-miR-378a-5p	chr18	61397875	61397896	-	22	4.51172	4.34007
mmu-miR-378a-3p	chr18	61397838	61397858	-	21	12.079	11.7948
mmu-miR-145a-5p	chr18	61647866	61647888	-	23	4.68483	4.01517
mmu-miR-145a-3p	chr18	61647827	61647848	-	22	3.28166	3.28561
mmu-miR-143-5p	chr18	61649233	61649253	-	21	0.570181	0.663052
mmu-miR-143-3p	chr18	61649199	61649219	-	21	11.8756	11.4195
mmu-miR-122-5p	chr18	65248866	65248887	+	22	0	0
mmu-miR-122-3p	chr18	65248901	65248920	+	20	0	0
mmu-miR-694	chr18	66219276	66219294	-	19	0	0
mmu-miR-7219-5p	chr18	68260951	68260973	-	23	0	0
mmu-miR-7219-3p	chr18	68260920	68260940	-	21	0	0
mmu-miR-6356	chr18	68739401	68739421	+	21	0	0
mmu-miR-145b	chr18	69022237	69022257	-	21	0	0
mmu-miR-6357	chr18	70516862	70516884	+	23	0	0
mmu-miR-6358	chr18	76170554	76170576	+	23	0	0
mmu-miR-5127	chr18	81992020	81992038	-	19	0	0
mmu-miR-5112	chr18	82720291	82720309	+	19	0	0
mmu-miR-6359	chr18	88972087	88972107	+	21	0	0
mmu-miR-6984-5p	chr19	3288925	3288948	+	24	0	0
mmu-miR-6984-3p	chr19	3288961	3288981	+	21	0	0
mmu-miR-6985-5p	chr19	4263852	4263873	-	22	0	0
mmu-miR-6985-3p	chr19	4263818	4263838	-	21	0	0.663052
mmu-miR-6986-5p	chr19	4623929	4623950	-	22	0	0
mmu-miR-6986-3p	chr19	4623898	4623916	-	19	0	0
mmu-miR-6987-5p	chr19	5679050	5679071	-	22	0	0
mmu-miR-6987-3p	chr19	5679004	5679026	-	23	0	0
mmu-miR-6988-5p	chr19	6051338	6051358	+	21	0	0
mmu-miR-6988-3p	chr19	6051371	6051392	+	22	1.29521	1.73713
mmu-miR-194-2-3p	chr19	6264694	6264715	+	22	1.55525	0.663052
mmu-miR-192-5p	chr19	6264857	6264877	+	21	10.6574	10.5679
mmu-miR-192-3p	chr19	6264900	6264921	+	22	0.570181	0.663052
mmu-miR-6989-5p	chr19	6346485	6346506	+	22	0	0
mmu-miR-6989-3p	chr19	6346523	6346544	+	22	1.96653	2.50269
mmu-miR-5046	chr19	6829917	6829940	-	24	0	0
mmu-miR-6990-5p	chr19	6914261	6914281	-	21	0.570181	0.663052
mmu-miR-6990-3p	chr19	6914196	6914216	-	21	0.570181	0
mmu-miR-6991-5p	chr19	7422578	7422599	+	22	0	0
mmu-miR-6991-3p	chr19	7422621	7422642	+	22	0.97777	0.663052
mmu-miR-6992-5p	chr19	8742976	8742998	+	23	1.77549	3.00021
mmu-miR-6992-3p	chr19	8743058	8743079	+	22	0	0
mmu-miR-5136	chr19	8888709	8888728	-	20	0	0
mmu-miR-6993-5p	chr19	10191380	10191402	+	23	0	0
mmu-miR-6993-3p	chr19	10191419	10191439	+	21	0	0
mmu-miR-6994-5p	chr19	11923733	11923755	+	23	1.55525	1.45958
mmu-miR-6994-3p	chr19	11923778	11923798	+	21	0	0
mmu-miR-496b	chr19	16314894	16314915	-	22	0	0
mmu-miR-204-5p	chr19	22750610	22750631	+	22	1.77549	2.50269
mmu-miR-204-3p	chr19	22750649	22750669	+	21	0	0
mmu-miR-1192	chr19	23149450	23149471	+	22	0	0
mmu-miR-3084-5p	chr19	24942276	24942297	-	22	0	0.663052
mmu-miR-3084-3p	chr19	24942240	24942260	-	21	2.66262	2.34596
mmu-miR-101b-5p	chr19	29135302	29135324	+	23	2.42288	1.9698
mmu-miR-101b-3p	chr19	29135338	29135356	+	19	10.675	10.7093
mmu-miR-3970	chr19	33157122	33157141	+	20	0	0
mmu-miR-107-5p	chr19	34820737	34820759	-	23	1.29521	0
mmu-miR-107-3p	chr19	34820700	34820722	-	23	8.04282	8.25802
mmu-miR-1950	chr19	34965402	34965423	+	22	0.570181	1.1156
mmu-miR-8092	chr19	40894754	40894774	+	21	0.570181	0
mmu-miR-8091	chr19	41588691	41588712	+	22	0	0
mmu-miR-3085-5p	chr19	42280131	42280155	-	25	0	0.663052
mmu-miR-3085-3p	chr19	42280095	42280115	-	21	3.95803	4.25447
mmu-miR-5114	chr19	44303171	44303192	+	22	2.1352	2.17011
mmu-miR-6405	chr19	44808501	44808523	+	23	0	0
mmu-miR-146b-5p	chr19	46342790	46342811	+	22	8.65574	8.37419
mmu-miR-146b-3p	chr19	46342828	46342849	+	22	0	0
mmu-miR-6995-5p	chr19	47273562	47273584	-	23	0	0
mmu-miR-6995-3p	chr19	47273519	47273539	-	21	0.570181	0
mmu-miR-8090	chr19	47755062	47755081	-	20	0	0
mmu-miR-6407	chr19	53010679	53010701	-	23	0	0
mmu-miR-6715-5p	chr19	55192678	55192700	+	23	0	0
mmu-miR-6715-3p	chr19	55192714	55192734	+	21	0	0
mmu-miR-5623-5p	chr19	58051167	58051190	+	24	0	0
mmu-miR-5623-3p	chr19	58051215	58051236	+	22	0	0
mmu-miR-3086-5p	chr19	58911725	58911744	-	20	4.24293	3.84989
mmu-miR-3086-3p	chr19	58911686	58911707	-	22	0	0
mmu-miR-466m-5p	chr2	10466677	10466699	+	23	0	0
mmu-miR-466m-3p	chr2	10466713	10466734	+	22	1.77549	1.1156
mmu-miR-466f-5p	chr2	10466954	10466975	+	22	4.57176	3.28561
mmu-miR-466f-3p	chr2	10466998	10467018	+	21	0	0
mmu-miR-669f-5p	chr2	10467248	10467271	+	24	4.57176	3.66318
mmu-miR-669f-3p	chr2	10467285	10467307	+	23	3.76579	3.52378
mmu-miR-669e-5p	chr2	10467537	10467558	+	22	3.13017	2.89098
mmu-miR-669e-3p	chr2	10467574	10467594	+	21	2.86814	2.64405
mmu-miR-669b-5p	chr2	10467814	10467835	+	22	6.13573	5.32516
mmu-miR-669b-3p	chr2	10467851	10467873	+	23	1.77549	1.73713
mmu-miR-669d-5p	chr2	10468384	10468405	+	22	4.71176	4.34007
mmu-miR-669d-3p	chr2	10468423	10468443	+	21	0.570181	0
mmu-miR-669l-5p	chr2	10468989	10469010	+	22	5.76336	4.60509
mmu-miR-669l-3p	chr2	10469027	10469048	+	22	0.97777	0.663052
mmu-miR-669d-2-3p	chr2	10471696	10471717	+	22	0.570181	0
mmu-miR-297a-5p	chr2	10472264	10472285	+	22	0	0
mmu-miR-466o-5p	chr2	10472553	10472574	+	22	0.570181	1.1156
mmu-miR-466o-3p	chr2	10472589	10472610	+	22	2.66262	1.9698
mmu-miR-467c-5p	chr2	10473941	10473962	+	22	8.24074	7.53875
mmu-miR-467c-3p	chr2	10473977	10473998	+	22	2.54772	2.17011
mmu-miR-466b-5p	chr2	10474228	10474249	+	22	0.570181	1.1156
mmu-miR-466b-3p	chr2	10474269	10474290	+	22	0	0
mmu-miR-669a-5p	chr2	10474460	10474483	+	24	0	0
mmu-miR-669a-3-3p	chr2	10474496	10474518	+	23	2.76903	1.45958
mmu-miR-669k-5p	chr2	10475318	10475342	+	25	1.29521	1.1156
mmu-miR-669k-3p	chr2	10475364	10475384	+	21	0	0
mmu-miR-467a-5p	chr2	10476355	10476376	+	22	0	0
mmu-miR-467a-3p	chr2	10476390	10476411	+	22	0	0
mmu-miR-669a-3p	chr2	10476908	10476930	+	23	0	0
mmu-miR-669g	chr2	10477170	10477192	+	23	0.570181	2.17011
mmu-miR-669j	chr2	10477989	10478010	+	22	0	0
mmu-miR-466e-5p	chr2	10479099	10479120	+	22	2.28619	1.9698
mmu-miR-466e-3p	chr2	10479138	10479160	+	23	0	0
mmu-miR-467b-5p	chr2	10481256	10481276	+	21	0	0
mmu-miR-467b-3p	chr2	10481293	10481314	+	22	0	0
mmu-miR-466c-5p	chr2	10481544	10481567	+	24	5.08578	4.20968
mmu-miR-466c-3p	chr2	10481585	10481606	+	22	0	0
mmu-miR-669p-5p	chr2	10489130	10489153	+	24	0	0
mmu-miR-669p-3p	chr2	10489167	10489190	+	24	1.77549	1.1156
mmu-miR-467e-5p	chr2	10505731	10505752	+	22	6.43144	5.77282
mmu-miR-467e-3p	chr2	10505768	10505789	+	22	2.76903	2.34596
mmu-miR-466p-5p	chr2	10506020	10506040	+	21	0.570181	0.663052
mmu-miR-466p-3p	chr2	10506059	10506080	+	22	0	0
mmu-miR-467d-5p	chr2	10507640	10507661	+	22	7.55534	6.79031
mmu-miR-467d-3p	chr2	10507676	10507697	+	22	0	0
mmu-miR-466a-5p	chr2	10507928	10507949	+	22	2.42288	2.34596
mmu-miR-466a-3p	chr2	10507967	10507989	+	23	0	0
mmu-miR-297c-5p	chr2	10509026	10509047	+	22	1.77549	0.663052
mmu-miR-297c-3p	chr2	10509065	10509086	+	22	4.54205	4.38105
mmu-miR-669c-5p	chr2	10509319	10509340	+	22	6.69033	6.01332
mmu-miR-669c-3p	chr2	10509359	10509380	+	22	0	0
mmu-miR-297b-5p	chr2	10511686	10511707	+	22	4.57176	3.66318
mmu-miR-297b-3p	chr2	10511723	10511744	+	22	4.54205	4.38105
mmu-miR-466d-5p	chr2	10511977	10511998	+	22	5.36565	4.42089
mmu-miR-466d-3p	chr2	10512017	10512037	+	21	5.08578	4.49741
mmu-miR-669m-5p	chr2	10512814	10512836	+	23	5.58547	4.67265
mmu-miR-669m-3p	chr2	10512847	10512868	+	22	1.55525	0.663052
mmu-miR-466n-5p	chr2	10513759	10513780	+	22	5.36565	4.42089
mmu-miR-466n-3p	chr2	10513798	10513819	+	22	4.24293	3.52378
mmu-miR-669o-5p	chr2	10514318	10514340	+	23	5.68397	5.04826
mmu-miR-669o-3p	chr2	10514355	10514377	+	23	0	0
mmu-miR-466g	chr2	10514642	10514662	+	21	3.48271	3.19661
mmu-miR-466h-5p	chr2	10514901	10514922	+	22	5.9559	5.4265
mmu-miR-466h-3p	chr2	10514940	10514958	+	19	1.55525	2.50269
mmu-miR-297a-3p	chr2	10515869	10515890	+	22	4.54205	4.38105
mmu-miR-466l-5p	chr2	10516117	10516138	+	22	0	1.1156
mmu-miR-466l-3p	chr2	10516156	10516177	+	22	1.55525	1.45958
mmu-miR-669i	chr2	10517671	10517691	+	21	0	0
mmu-miR-669h-5p	chr2	10518174	10518197	+	24	3.54394	2.77279
mmu-miR-669h-3p	chr2	10518219	10518240	+	22	0	0
mmu-miR-511-5p	chr2	14261013	14261033	+	21	0	0
mmu-miR-511-3p	chr2	14261051	14261072	+	22	0	0
mmu-miR-6419	chr2	17563541	17563562	+	22	0	0
mmu-miR-7655-5p	chr2	18057846	18057867	+	22	1.77549	2.17011
mmu-miR-7655-3p	chr2	18057882	18057903	+	22	1.55525	2.17011
mmu-miR-3967	chr2	22654321	22654340	+	20	0	0
mmu-miR-7664-5p	chr2	25059811	25059831	+	21	0	0
mmu-miR-7664-3p	chr2	25059851	25059873	+	23	0	0
mmu-miR-3087-5p	chr2	25442780	25442800	+	21	0	0
mmu-miR-3087-3p	chr2	25442813	25442833	+	21	0.97777	0
mmu-miR-6996-5p	chr2	26470094	26470114	-	21	0	0
mmu-miR-6996-3p	chr2	26470059	26470081	-	23	0	0
mmu-miR-126a-5p	chr2	26591365	26591385	+	21	10.7893	10.569
mmu-miR-126a-3p	chr2	26591402	26591423	+	22	7.33484	7.35559
mmu-miR-126b-5p	chr2	26591399	26591420	-	22	0	0
mmu-miR-126b-3p	chr2	26591363	26591385	-	23	0	1.1156
mmu-miR-7578	chr2	27450549	27450572	-	24	0	0
mmu-miR-3088-5p	chr2	28733286	28733307	+	22	0	0
mmu-miR-3088-3p	chr2	28733321	28733343	+	23	0.570181	0
mmu-miR-133c	chr2	29475217	29475239	-	23	0	0
mmu-miR-219a-2-3p	chr2	29845645	29845666	-	22	0	0
mmu-miR-219b-5p	chr2	29845647	29845668	+	22	0.570181	1.1156
mmu-miR-219b-3p	chr2	29845689	29845711	+	23	0.570181	2.50269
mmu-miR-6997-5p	chr2	29995955	29995976	+	22	1.55525	1.1156
mmu-miR-6997-3p	chr2	29995996	29996018	+	23	0	0
mmu-miR-3089-5p	chr2	30721222	30721243	+	22	0	0
mmu-miR-3089-3p	chr2	30721259	30721281	+	23	0	0
mmu-miR-6998-5p	chr2	31612426	31612447	+	22	0	0
mmu-miR-6998-3p	chr2	31612462	31612483	+	22	0.570181	0
mmu-miR-7674-5p	chr2	32050946	32050969	+	24	0	0
mmu-miR-7674-3p	chr2	32050988	32051008	+	21	0	0
mmu-miR-3154	chr2	32318317	32318338	+	22	0	0
mmu-miR-199b-5p	chr2	32318485	32318507	+	23	1.29521	2.50269
mmu-miR-199b-3p	chr2	32318524	32318545	+	22	6.15548	5.75734
mmu-miR-1954	chr2	32652342	32652362	+	21	1.77549	0.663052
mmu-miR-8093	chr2	32687706	32687726	-	21	0	0
mmu-miR-2861	chr2	32712819	32712837	-	19	0	0
mmu-miR-3960	chr2	32712907	32712926	-	20	0	0
mmu-miR-5128	chr2	37688212	37688234	-	23	4.68483	4.85821
mmu-miR-181a-2-3p	chr2	38852788	38852809	+	22	0.570181	0
mmu-miR-181b-2-3p	chr2	38853883	38853904	+	22	0.570181	0
mmu-miR-6336	chr2	42447515	42447535	-	21	0	0
mmu-miR-5129-5p	chr2	45023146	45023167	-	22	0	0
mmu-miR-5129-3p	chr2	45023110	45023131	-	22	0	0
mmu-miR-195b	chr2	56785825	56785846	+	22	0	0
mmu-miR-6337	chr2	65364297	65364319	-	23	0	0
mmu-miR-7224-5p	chr2	67675457	67675477	+	21	0	0
mmu-miR-7224-3p	chr2	67675496	67675516	+	21	4.71176	4.60509
mmu-miR-6335	chr2	67781045	67781066	+	22	0	0
mmu-miR-10b-5p	chr2	74726074	74726096	+	23	5.97826	6.23065
mmu-miR-10b-3p	chr2	74726114	74726135	+	22	0	0
mmu-miR-684	chr2	80628714	80628732	-	19	0	1.1156
mmu-miR-130a-5p	chr2	84741155	84741176	-	22	3.81631	4.20968
mmu-miR-130a-3p	chr2	84741116	84741137	-	22	12.2685	12.3568
mmu-miR-6999-5p	chr2	91944908	91944930	-	23	0	0.663052
mmu-miR-6999-3p	chr2	91944872	91944893	-	22	0	0
mmu-miR-1955-5p	chr2	92191994	92192018	+	25	2.96087	2.50269
mmu-miR-1955-3p	chr2	92192035	92192055	+	21	1.77549	2.34596
mmu-miR-7000-5p	chr2	92387420	92387441	-	22	0	0
mmu-miR-7000-3p	chr2	92387384	92387405	-	22	0	0
mmu-miR-7221-5p	chr2	92592206	92592226	+	21	0	0
mmu-miR-7221-3p	chr2	92592257	92592277	+	21	0	0
mmu-miR-7222-5p	chr2	92594602	92594628	+	27	0	0
mmu-miR-7222-3p	chr2	92594654	92594676	+	23	0	0
mmu-miR-7001-5p	chr2	93421980	93422002	-	23	0	0
mmu-miR-7001-3p	chr2	93421929	93421948	-	20	0	0
mmu-miR-129-5p	chr2	94241419	94241439	-	21	5.6703	5.81828
mmu-miR-129-2-3p	chr2	94241376	94241397	-	22	4.00234	3.84989
mmu-miR-129b-5p	chr2	94241378	94241399	+	22	0	0
mmu-miR-129b-3p	chr2	94241420	94241442	+	23	0	0
mmu-miR-670-5p	chr2	94261358	94261379	-	22	0	0
mmu-miR-670-3p	chr2	94261316	94261340	-	25	0	0
mmu-miR-1902	chr2	104428871	104428892	-	22	0	0
mmu-miR-7002-5p	chr2	114150547	114150567	-	21	0	0.663052
mmu-miR-7002-3p	chr2	114150516	114150534	-	19	0	0
mmu-miR-1951	chr2	115638777	115638798	+	22	0	0.663052
mmu-miR-674-5p	chr2	117185151	117185172	+	22	5.52601	5.70989
mmu-miR-674-3p	chr2	117185186	117185207	+	22	7.60288	7.36072
mmu-miR-7665-5p	chr2	120017517	120017539	+	23	0.570181	0.663052
mmu-miR-7665-3p	chr2	120017558	120017579	+	22	0	0.663052
mmu-miR-147-5p	chr2	122640814	122640837	+	24	0	0
mmu-miR-147-3p	chr2	122640850	122640871	+	22	3.28166	3.59516
mmu-miR-3473g	chr2	126902290	126902309	-	20	0	1.73713
mmu-miR-6339	chr2	130016369	130016391	-	23	0	0
mmu-miR-6973b-5p	chr2	131040375	131040398	-	24	0	0
mmu-miR-6973b-3p	chr2	131040326	131040345	-	20	0	0.663052
mmu-miR-103-2-5p	chr2	131288066	131288088	+	23	0	0.663052
mmu-miR-3090-5p	chr2	133564722	133564742	+	21	0	0
mmu-miR-3090-3p	chr2	133564760	133564781	+	22	0	0
mmu-miR-1952	chr2	138819943	138819959	+	17	0	0
mmu-miR-1953	chr2	151967581	151967602	-	22	0	0
mmu-miR-5622-5p	chr2	152865067	152865088	+	22	0	0
mmu-miR-5622-3p	chr2	152865105	152865126	+	22	0	0
mmu-miR-695	chr2	155356831	155356852	+	22	0	0
mmu-miR-499-5p	chr2	155622893	155622913	+	21	4.1671	3.72814
mmu-miR-499-3p	chr2	155622929	155622951	+	23	0.570181	0.663052
mmu-miR-7685-5p	chr2	158243542	158243565	-	24	0	0
mmu-miR-7685-3p	chr2	158243504	158243524	-	21	0	0
mmu-miR-3474	chr2	158638583	158638604	+	22	0	0
mmu-miR-7003-5p	chr2	163068095	163068115	+	21	0.570181	1.45958
mmu-miR-7003-3p	chr2	163068137	163068155	+	19	0	0.663052
mmu-miR-7678-5p	chr2	164354363	164354383	-	21	0	0
mmu-miR-7678-3p	chr2	164354313	164354334	-	22	0	0
mmu-miR-7004-5p	chr2	168640731	168640754	-	24	0	0
mmu-miR-7004-3p	chr2	168640696	168640716	-	21	0	0
mmu-miR-6340	chr2	173701098	173701120	-	23	0	0
mmu-miR-296-5p	chr2	174267093	174267113	-	21	7.11538	7.22102
mmu-miR-296-3p	chr2	174267058	174267079	-	22	7.94121	7.77995
mmu-miR-298-5p	chr2	174267553	174267575	-	23	13.4023	13.3851
mmu-miR-298-3p	chr2	174267514	174267535	-	22	2.96087	1.9698
mmu-miR-7005-5p	chr2	180179797	180179818	-	22	0	0
mmu-miR-7005-3p	chr2	180179756	180179780	-	25	0.97777	1.1156
mmu-miR-3091-5p	chr2	180257547	180257567	+	21	1.77549	2.77279
mmu-miR-3091-3p	chr2	180257580	180257601	+	22	1.77549	0.663052
mmu-miR-1a-1-5p	chr2	180389057	180389079	+	23	0	0
mmu-miR-7006-5p	chr2	181587939	181587963	-	25	0	0
mmu-miR-7006-3p	chr2	181587900	181587919	-	20	2.42288	1.73713
mmu-miR-7007-5p	chr3	20222332	20222354	-	23	0	0
mmu-miR-7007-3p	chr3	20222294	20222311	-	18	0	0
mmu-miR-3092-5p	chr3	27584958	27584979	-	22	0	0
mmu-miR-3092-3p	chr3	27584915	27584935	-	21	1.29521	1.45958
mmu-miR-466q	chr3	28419988	28420007	+	20	0	0.663052
mmu-miR-551b-5p	chr3	29416840	29416862	+	23	0	0
mmu-miR-551b-3p	chr3	29416879	29416899	+	21	0	0
mmu-miR-21b	chr3	29636768	29636790	+	23	0	0
mmu-miR-7008-5p	chr3	31038971	31038994	+	24	0	0
mmu-miR-7008-3p	chr3	31039007	31039028	+	22	1.55525	1.73713
mmu-miR-1897-5p	chr3	34638474	34638495	+	22	0	0
mmu-miR-1897-3p	chr3	34638511	34638532	+	22	0	0
mmu-miR-6378	chr3	34922623	34922644	-	22	0	0
mmu-miR-7009-5p	chr3	36475498	36475519	-	22	0	0
mmu-miR-7009-3p	chr3	36475461	36475481	-	21	0	0
mmu-miR-6379	chr3	46900700	46900721	-	22	0	0
mmu-miR-6377	chr3	57616699	57616721	+	23	0	0
mmu-miR-8120	chr3	65659328	65659349	+	22	0	0
mmu-miR-15b-5p	chr3	69009775	69009796	+	22	9.23488	9.18511
mmu-miR-15b-3p	chr3	69009813	69009834	+	22	6.49484	6.42929
mmu-miR-16-2-3p	chr3	69009960	69009981	+	22	4.44907	4.42089
mmu-miR-7010-5p	chr3	82106284	82106305	-	22	0	0
mmu-miR-7010-3p	chr3	82106248	82106268	-	21	0	0
mmu-miR-466k	chr3	85467396	85467418	+	23	0.97777	0
mmu-miR-3093-5p	chr3	88215186	88215207	+	22	0	0
mmu-miR-3093-3p	chr3	88215226	88215247	+	22	0	0
mmu-miR-7011-5p	chr3	88440924	88440946	-	23	0	0
mmu-miR-7011-3p	chr3	88440879	88440899	-	21	0	0
mmu-miR-1905	chr3	88536311	88536332	-	22	0	0
mmu-miR-92b-5p	chr3	89227165	89227188	-	24	1.96653	2.77279
mmu-miR-92b-3p	chr3	89227126	89227147	-	22	12.5918	12.7509
mmu-miR-7669-5p	chr3	90011188	90011210	-	23	0	0
mmu-miR-7669-3p	chr3	90011153	90011175	-	23	0	0
mmu-miR-190b-5p	chr3	90070030	90070050	+	21	3.54394	2.89098
mmu-miR-190b-3p	chr3	90070067	90070089	+	23	0.570181	0
mmu-miR-7012-5p	chr3	90270154	90270176	+	23	0	0
mmu-miR-7012-3p	chr3	90270191	90270212	+	22	0.570181	0
mmu-miR-7013-5p	chr3	95004173	95004194	+	22	0	0
mmu-miR-7013-3p	chr3	95004213	95004236	+	24	0	0
mmu-miR-7014-5p	chr3	95734947	95734968	-	22	0	0
mmu-miR-7014-3p	chr3	95734911	95734931	-	21	0	0
mmu-miR-7225-5p	chr3	97690543	97690562	-	20	0	0
mmu-miR-7225-3p	chr3	97690509	97690530	-	22	0	0
mmu-miR-6481	chr3	99199367	99199385	-	19	0	0
mmu-miR-669n	chr3	115979905	115979924	+	20	0	0
mmu-miR-137-5p	chr3	118433865	118433887	+	23	0	0
mmu-miR-137-3p	chr3	118433901	118433923	+	23	0	0
mmu-miR-760-5p	chr3	122293649	122293671	-	23	0.97777	0
mmu-miR-760-3p	chr3	122293615	122293634	-	20	3.71345	4.57008
mmu-miR-7657-5p	chr3	122541661	122541681	-	21	0	0
mmu-miR-7657-3p	chr3	122541625	122541647	-	23	0	0
mmu-miR-302b-5p	chr3	127545238	127545260	+	23	0	0
mmu-miR-302b-3p	chr3	127545275	127545297	+	23	4.12764	4.06631
mmu-miR-302c-5p	chr3	127545368	127545389	+	22	0.570181	0.663052
mmu-miR-302c-3p	chr3	127545406	127545427	+	22	0	0
mmu-miR-302a-5p	chr3	127545501	127545522	+	22	2.42288	2.64405
mmu-miR-302a-3p	chr3	127545539	127545561	+	23	4.48073	3.59516
mmu-miR-302d-5p	chr3	127545629	127545651	+	23	0.97777	1.45958
mmu-miR-302d-3p	chr3	127545665	127545687	+	23	4.04533	4.60509
mmu-miR-367-5p	chr3	127545741	127545761	+	21	0	0
mmu-miR-367-3p	chr3	127545779	127545800	+	22	1.77549	0.663052
mmu-miR-1895	chr3	134240515	134240536	-	22	0	0
mmu-miR-6380	chr3	137783536	137783559	-	24	0	0
mmu-miR-1956	chr3	138526425	138526446	+	22	0.570181	0
mmu-let-7j	chr3	140028281	140028304	+	24	0	0
mmu-miR-6381	chr3	142623925	142623945	-	21	0	0
mmu-miR-3963	chr3	151023839	151023857	-	19	3.048	1.9698
mmu-miR-186-5p	chr3	157544285	157544306	+	22	12.3173	12.2503
mmu-miR-186-3p	chr3	157544324	157544345	+	22	3.35184	2.64405
mmu-miR-3471	chr4	3537103	3537124	+	22	0	0
mmu-miR-6400	chr4	15942907	15942927	-	21	0	0
mmu-miR-8118	chr4	33438153	33438174	+	22	0	0.663052
mmu-miR-876-5p	chr4	36645422	36645443	-	22	0	0
mmu-miR-876-3p	chr4	36645383	36645404	-	22	0	0
mmu-miR-873a-5p	chr4	36668556	36668576	-	21	0	0
mmu-miR-873a-3p	chr4	36668520	36668540	-	21	0	0
mmu-miR-873b	chr4	36668565	36668586	+	22	0	0
mmu-miR-207	chr4	40722968	40722990	+	23	0.570181	0
mmu-miR-5123	chr4	40850057	40850080	-	24	1.77549	2.50269
mmu-miR-3094-5p	chr4	40993696	40993716	+	21	0.570181	0.663052
mmu-miR-3094-3p	chr4	40993738	40993758	+	21	0	0.663052
mmu-miR-5106	chr4	44221197	44221219	-	23	0	0.663052
mmu-miR-5120	chr4	44607536	44607558	-	23	0	0
mmu-miR-1958	chr4	48213134	48213155	-	22	0	0
mmu-miR-32-5p	chr4	56895272	56895293	-	22	6.43144	5.98702
mmu-miR-32-3p	chr4	56895232	56895252	-	21	4.78968	5.34601
mmu-miR-3095-5p	chr4	58441064	58441085	-	22	0	0.663052
mmu-miR-3095-3p	chr4	58441023	58441045	-	23	1.96653	0.663052
mmu-miR-455-5p	chr4	63256867	63256888	+	22	2.42288	2.64405
mmu-miR-455-3p	chr4	63256904	63256924	+	21	0.570181	1.1156
mmu-miR-491-5p	chr4	88122057	88122078	+	22	0.97777	0
mmu-miR-491-3p	chr4	88122091	88122112	+	22	1.29521	0
mmu-miR-31-5p	chr4	88910614	88910635	-	22	8.7945	8.82758
mmu-miR-31-3p	chr4	88910577	88910599	-	23	3.71345	3.44868
mmu-miR-6402	chr4	91373285	91373307	-	23	0	0
mmu-miR-872-5p	chr4	94665167	94665187	+	21	9.76018	9.80826
mmu-miR-872-3p	chr4	94665206	94665227	+	22	8.92395	9.05507
mmu-miR-101a-5p	chr4	101346993	101347014	-	22	6.61385	6.40962
mmu-miR-101a-3p	chr4	101346957	101346977	-	21	11.6439	11.6465
mmu-miR-6397	chr4	108087414	108087434	+	21	0	0
mmu-miR-761	chr4	109017669	109017690	+	22	0	0
mmu-miR-7226-5p	chr4	118210539	118210564	-	26	0	0
mmu-miR-7226-3p	chr4	118210505	118210527	-	23	4.57176	4.94274
mmu-miR-1957a	chr4	119129792	119129810	+	19	0	0
mmu-miR-30c-1-3p	chr4	120769546	120769567	-	22	6.50257	6.60386
mmu-miR-30f	chr4	120772621	120772642	+	22	0	0
mmu-miR-30e-5p	chr4	120772660	120772681	-	22	13.1507	13.1407
mmu-miR-30e-3p	chr4	120772618	120772639	-	22	9.18168	9.23346
mmu-miR-7015-5p	chr4	120973295	120973317	-	23	0	0
mmu-miR-7015-3p	chr4	120973259	120973279	-	21	2.86814	2.17011
mmu-miR-6398	chr4	123616493	123616513	+	21	0	0
mmu-miR-697	chr4	124731768	124731788	+	21	0	0
mmu-miR-698-3p	chr4	124743852	124743870	+	19	0	0
mmu-miR-698-5p	chr4	124743818	124743838	+	21	0	0
mmu-miR-7119-5p	chr4	126559865	126559885	+	21	0	0
mmu-miR-7119-3p	chr4	126559898	126559918	+	21	0	0
mmu-miR-8119	chr4	129557756	129557775	-	20	0	0
mmu-miR-7016-5p	chr4	129684546	129684566	-	21	0	0
mmu-miR-7016-3p	chr4	129684500	129684521	-	22	0	0
mmu-miR-7017-5p	chr4	133195660	133195683	+	24	0.570181	0.663052
mmu-miR-7017-3p	chr4	133195696	133195716	+	21	0	0.663052
mmu-miR-5122	chr4	133369784	133369803	+	20	5.6143	4.73719
mmu-miR-7227-5p	chr4	133717089	133717108	-	20	0	0
mmu-miR-7227-3p	chr4	133717050	133717071	-	22	0.570181	0
mmu-miR-6403	chr4	134567757	134567778	-	22	0	0
mmu-miR-700-5p	chr4	135416601	135416622	-	22	5.31385	5.04826
mmu-miR-700-3p	chr4	135416561	135416581	-	21	5.39918	5.23863
mmu-miR-7018-5p	chr4	137538286	137538309	+	24	0	0
mmu-miR-7018-3p	chr4	137538349	137538370	+	22	2.28619	1.9698
mmu-miR-6399	chr4	138163263	138163284	+	22	1.55525	1.73713
mmu-miR-7019-5p	chr4	138316173	138316195	-	23	0	0.663052
mmu-miR-7019-3p	chr4	138316132	138316154	-	23	0	0
mmu-miR-7020-5p	chr4	139644047	139644070	+	24	0	0
mmu-miR-7020-3p	chr4	139644091	139644111	+	21	0	0
mmu-miR-2139	chr4	139967531	139967554	-	24	0	0
mmu-miR-7021-5p	chr4	143136136	143136157	-	22	0.97777	1.1156
mmu-miR-7021-3p	chr4	143136100	143136121	-	22	0	0
mmu-miR-7022-5p	chr4	148146973	148146995	-	23	0	0
mmu-miR-7022-3p	chr4	148146937	148146958	-	22	0	0.663052
mmu-miR-5616-5p	chr4	149537863	149537883	+	21	1.29521	0.663052
mmu-miR-5616-3p	chr4	149537901	149537922	+	22	0.570181	0.663052
mmu-miR-7023-5p	chr4	149655540	149655562	-	23	0	0
mmu-miR-7023-3p	chr4	149655504	149655525	-	22	0	0
mmu-miR-34a-5p	chr4	150068473	150068494	+	22	7.70024	7.74114
mmu-miR-34a-3p	chr4	150068517	150068537	+	21	4.12764	4.25447
mmu-miR-429-5p	chr4	156053954	156053974	-	21	1.29521	0
mmu-miR-429-3p	chr4	156053916	156053937	-	22	8.89926	9.02952
mmu-miR-200a-5p	chr4	156054949	156054970	-	22	5.86284	5.07348
mmu-miR-200a-3p	chr4	156054911	156054932	-	22	7.47114	7.46444
mmu-miR-200b-5p	chr4	156055721	156055742	-	22	4.08707	4.42089
mmu-miR-200b-3p	chr4	156055685	156055706	-	22	10.2441	10.0734
mmu-miR-7658-5p	chr4	156230096	156230115	-	20	0.97777	0
mmu-miR-7658-3p	chr4	156230059	156230079	-	21	0	0
mmu-miR-879-5p	chr5	9375714	9375734	+	21	5.43195	5.21617
mmu-miR-879-3p	chr5	9375748	9375769	+	22	0.570181	1.1156
mmu-miR-671-5p	chr5	24592132	24592154	+	23	3.86511	3.52378
mmu-miR-671-3p	chr5	24592171	24592191	+	21	6.17497	5.86235
mmu-miR-1960	chr5	30170751	30170772	+	22	1.77549	1.73713
mmu-miR-5625-5p	chr5	30647936	30647956	+	21	0	0
mmu-miR-5625-3p	chr5	30647991	30648015	+	25	0	0
mmu-miR-3473e	chr5	31667296	31667316	-	21	0	0
mmu-miR-7024-5p	chr5	33898946	33898966	-	21	0.97777	0
mmu-miR-7024-3p	chr5	33898910	33898932	-	23	0.570181	0.663052
mmu-miR-7036b-5p	chr5	34574151	34574172	+	22	0.97777	0
mmu-miR-7036b-3p	chr5	34574192	34574213	+	22	0.97777	0
mmu-miR-467g	chr5	34732872	34732892	-	21	0	0
mmu-miR-3097-5p	chr5	35021050	35021072	+	23	0	0
mmu-miR-3097-3p	chr5	35021094	35021115	+	22	0.570181	0
mmu-miR-7689-5p	chr5	36301570	36301588	+	19	0	0
mmu-miR-7689-3p	chr5	36301606	36301628	+	23	2.1352	1.1156
mmu-miR-6414	chr5	41891400	41891421	+	22	0	0
mmu-miR-218-1-3p	chr5	48224005	48224026	+	22	0.570181	0
mmu-miR-8117	chr5	50252823	50252843	+	21	0	0
mmu-miR-6417	chr5	52135972	52135993	-	22	0	0
mmu-miR-574-5p	chr5	64970328	64970350	+	23	0	0
mmu-miR-574-3p	chr5	64970364	64970385	+	22	4.65738	3.7903
mmu-miR-7025-5p	chr5	75176836	75176859	+	24	0	0
mmu-miR-7025-3p	chr5	75176878	75176899	+	22	0	0
mmu-miR-5098	chr5	77272767	77272787	+	21	0	0
mmu-miR-1187	chr5	82798964	82798986	-	23	0	0.663052
mmu-miR-3969	chr5	87595963	87595982	-	20	0	0
mmu-miR-6415	chr5	92458559	92458580	+	22	0	0
mmu-miR-1961	chr5	92788465	92788481	-	17	0	0
mmu-miR-703	chr5	98475616	98475636	-	21	1.29521	3.7903
mmu-miR-5619-5p	chr5	104048003	104048023	+	21	0	0
mmu-miR-5619-3p	chr5	104048042	104048063	+	22	0.97777	1.9698
mmu-miR-7026-5p	chr5	110666116	110666136	-	21	0	0
mmu-miR-7026-3p	chr5	110666075	110666097	-	23	0	0
mmu-miR-701-5p	chr5	111004170	111004190	+	21	0	0
mmu-miR-701-3p	chr5	111004208	111004227	+	20	0.570181	0.663052
mmu-miR-7229-5p	chr5	113324525	113324545	-	21	0	0
mmu-miR-7229-3p	chr5	113324493	113324516	-	24	0	0
mmu-miR-7230-5p	chr5	113337623	113337645	-	23	0	0
mmu-miR-7230-3p	chr5	113337590	113337612	-	23	0	0
mmu-miR-7027-5p	chr5	114404473	114404495	+	23	0	0
mmu-miR-7027-3p	chr5	114404518	114404539	+	22	0	0
mmu-miR-7028-5p	chr5	114719515	114719537	+	23	0	1.45958
mmu-miR-7028-3p	chr5	114719557	114719578	+	22	0	0
mmu-miR-6240	chr5	114851973	114851998	+	26	9.53739	9.83431
mmu-miR-7029-5p	chr5	115580954	115580976	+	23	0	0
mmu-miR-7029-3p	chr5	115580984	115581005	+	22	0	0.663052
mmu-miR-7030-5p	chr5	115645578	115645599	+	22	0	0
mmu-miR-7030-3p	chr5	115645612	115645632	+	21	0.570181	0
mmu-miR-7031-5p	chr5	121819246	121819268	-	23	0	0
mmu-miR-7031-3p	chr5	121819209	121819229	-	21	0	0
mmu-miR-8115	chr5	122682664	122682685	+	22	2.28619	1.45958
mmu-miR-7647-5p	chr5	123522674	123522695	-	22	0.570181	0.663052
mmu-miR-7647-3p	chr5	123522637	123522657	-	21	0	0.663052
mmu-miR-7032-5p	chr5	123996857	123996882	+	26	0	0
mmu-miR-7032-3p	chr5	123996908	123996929	+	22	0	0
mmu-miR-3965	chr5	134326494	134326512	+	19	0	0
mmu-miR-7228-5p	chr5	134572076	134572094	+	19	0	0
mmu-miR-7228-3p	chr5	134572098	134572114	+	17	0	0
mmu-miR-7033-5p	chr5	135383783	135383805	-	23	0.97777	0.663052
mmu-miR-7033-3p	chr5	135383730	135383750	-	21	0.97777	0
mmu-miR-7034-5p	chr5	135735864	135735884	-	21	0	0
mmu-miR-7034-3p	chr5	135735807	135735830	-	24	0	0
mmu-miR-7035-5p	chr5	136105527	136105547	+	21	0	0
mmu-miR-7035-3p	chr5	136105583	136105603	+	21	1.77549	1.1156
mmu-miR-721	chr5	136375777	136375797	-	21	0	0
mmu-miR-702-3p	chr5	136991520	136991541	+	22	6.59227	6.87163
mmu-miR-702-5p	chr5	136991442	136991462	+	21	2.96087	3.72814
mmu-miR-8116	chr5	137293800	137293820	+	21	0	0
mmu-miR-7036a-5p	chr5	137296661	137296683	-	23	0	0
mmu-miR-7036a-3p	chr5	137296624	137296646	-	23	0.97777	1.1156
mmu-miR-6418-5p	chr5	137529551	137529571	-	21	0	0
mmu-miR-6418-3p	chr5	137529509	137529530	-	22	1.29521	0
mmu-miR-25-5p	chr5	138165370	138165391	-	22	8.0295	8.4411
mmu-miR-25-3p	chr5	138165332	138165353	-	22	13.5155	13.4771
mmu-miR-93-5p	chr5	138165574	138165596	-	23	12.1163	12.1043
mmu-miR-93-3p	chr5	138165536	138165557	-	22	7.11033	7.21536
mmu-miR-106b-5p	chr5	138165787	138165807	-	21	9.52416	9.61786
mmu-miR-106b-3p	chr5	138165746	138165767	-	22	9.00513	9.1155
mmu-miR-339-5p	chr5	139369708	139369730	-	23	6.39866	6.32816
mmu-miR-339-3p	chr5	139369673	139369695	-	23	6.49484	6.54198
mmu-miR-7037-5p	chr5	139767915	139767938	-	24	0	0
mmu-miR-7037-3p	chr5	139767879	139767900	-	22	0.570181	0
mmu-miR-7038-5p	chr5	140427344	140427365	+	22	0.97777	0
mmu-miR-7038-3p	chr5	140427388	140427409	+	22	0	0
mmu-miR-7039-5p	chr5	144896790	144896811	-	22	0	0
mmu-miR-7039-3p	chr5	144896732	144896753	-	22	0	0
mmu-let-7k	chr5	147283257	147283275	-	19	0	0
mmu-miR-653-5p	chr6	3721355	3721375	-	21	4.60087	4.94274
mmu-miR-653-3p	chr6	3721315	3721335	-	21	0	0
mmu-miR-489-3p	chr6	3721922	3721944	-	23	1.77549	0
mmu-miR-489-5p	chr6	3721957	3721981	-	25	0	0
mmu-miR-6370	chr6	19555438	19555458	+	21	0	0
mmu-miR-592-5p	chr6	27936711	27936733	-	23	0.570181	0
mmu-miR-592-3p	chr6	27936672	27936693	-	22	0	0
mmu-miR-129-1-3p	chr6	29022667	29022688	+	22	2.76903	2.50269
mmu-miR-182-5p	chr6	30165962	30165986	-	25	17.1318	17.0588
mmu-miR-182-3p	chr6	30165923	30165943	-	21	5.68397	6.30705
mmu-miR-96-5p	chr6	30169506	30169528	-	23	8.73173	8.66498
mmu-miR-96-3p	chr6	30169465	30169486	-	22	4.83938	5.14659
mmu-miR-183-5p	chr6	30169711	30169732	-	22	14.5982	14.4456
mmu-miR-183-3p	chr6	30169672	30169693	-	22	9.15003	9.31236
mmu-miR-335-5p	chr6	30741314	30741336	+	23	7.13542	7.54777
mmu-miR-335-3p	chr6	30741354	30741375	+	22	10.1157	10.2791
mmu-miR-29a-5p	chr6	31062711	31062732	-	22	0.97777	1.1156
mmu-miR-29a-3p	chr6	31062673	31062694	-	22	6.86846	6.39969
mmu-miR-29b-1-5p	chr6	31063067	31063088	-	22	0	0
mmu-miR-490-5p	chr6	36421763	36421782	+	20	0	0
mmu-miR-490-3p	chr6	36421800	36421821	+	22	0	0
mmu-miR-7670-5p	chr6	38507325	38507346	+	22	0	0
mmu-miR-7670-3p	chr6	38507371	38507393	+	23	0.97777	1.73713
mmu-miR-704	chr6	47803590	47803610	-	21	2.54772	1.1156
mmu-miR-6371	chr6	50572459	50572481	+	23	0	0
mmu-miR-148a-5p	chr6	51269867	51269888	-	22	9.18649	9.08637
mmu-miR-148a-3p	chr6	51269829	51269850	-	22	13.862	13.6587
mmu-miR-196b-5p	chr6	52230129	52230150	-	22	2.86814	2.34596
mmu-miR-196b-3p	chr6	52230094	52230115	-	22	0.570181	0
mmu-miR-8112	chr6	71271745	71271764	+	20	2.54772	2.50269
mmu-miR-7232-5p	chr6	81895640	81895663	-	24	0	0
mmu-miR-7232-3p	chr6	81895590	81895611	-	22	0	0
mmu-miR-468-3p	chr6	81896602	81896624	-	23	0	0
mmu-miR-468-5p	chr6	81896629	81896655	-	27	0	0
mmu-miR-7040-5p	chr6	83049716	83049737	+	22	0	0
mmu-miR-7040-3p	chr6	83049752	83049773	+	22	0	0
mmu-miR-3470a	chr6	83090360	83090380	-	21	0	0
mmu-miR-6374	chr6	83401060	83401081	-	22	0	0
mmu-miR-705	chr6	85336341	85336360	-	20	0	0
mmu-miR-6375	chr6	85790203	85790225	-	23	0	0
mmu-miR-6376	chr6	88104204	88104225	-	22	0	0
mmu-miR-7041-5p	chr6	94606388	94606410	-	23	0	0
mmu-miR-7041-3p	chr6	94606364	94606383	-	20	0	0.663052
mmu-miR-6373	chr6	102794445	102794466	+	22	0	0
mmu-miR-7661-5p	chr6	108489743	108489767	+	25	0	0
mmu-miR-7661-3p	chr6	108489782	108489803	+	22	1.29521	1.9698
mmu-miR-7042-5p	chr6	113707213	113707233	+	21	0.570181	1.1156
mmu-miR-7042-3p	chr6	113707245	113707265	+	21	0	0
mmu-miR-7660-5p	chr6	115775657	115775678	+	22	0.570181	0
mmu-miR-7660-3p	chr6	115775697	115775719	+	23	0	0
mmu-miR-7043-5p	chr6	116646020	116646042	-	23	0	0
mmu-miR-7043-3p	chr6	116645978	116645998	-	21	0.570181	0
mmu-miR-7044-5p	chr6	118085197	118085215	+	19	0	0
mmu-miR-7044-3p	chr6	118085243	118085263	+	21	0	0
mmu-miR-706	chr6	120034290	120034311	-	22	0	0
mmu-miR-7231-5p	chr6	122831377	122831398	+	22	0.570181	0
mmu-miR-7231-3p	chr6	122831415	122831437	+	23	0	0
mmu-miR-141-5p	chr6	124717959	124717980	-	22	5.73738	5.44594
mmu-miR-141-3p	chr6	124717917	124717938	-	22	8.01065	8.03549
mmu-miR-200c-5p	chr6	124718365	124718386	-	22	1.29521	1.73713
mmu-miR-200c-3p	chr6	124718324	124718346	-	23	6.08513	6.63807
mmu-miR-7045-5p	chr6	125097029	125097049	+	21	0	0
mmu-miR-7045-3p	chr6	125097066	125097086	+	21	0	0
mmu-miR-3098-5p	chr6	125195807	125195828	+	22	3.76579	3.66318
mmu-miR-3098-3p	chr6	125195845	125195865	+	21	1.96653	1.9698
mmu-miR-8113	chr6	125234756	125234777	-	22	0	0
mmu-miR-7233-5p	chr6	127788125	127788143	-	19	0	0
mmu-miR-7233-3p	chr6	127788084	127788105	-	22	0	0
mmu-miR-7649-5p	chr6	128974874	128974895	-	22	0	0
mmu-miR-7649-3p	chr6	128974840	128974862	-	23	0	0
mmu-miR-290a-5p	chr7	3218639	3218660	+	22	10.4625	10.5119
mmu-miR-290a-3p	chr7	3218674	3218697	+	24	8.36259	9.30573
mmu-miR-290b-5p	chr7	3218674	3218695	-	22	0	0
mmu-miR-290b-3p	chr7	3218638	3218659	-	22	0	0
mmu-miR-291a-5p	chr7	3218932	3218953	+	22	13.7434	13.8361
mmu-miR-291a-3p	chr7	3218968	3218989	+	22	12.2641	12.3327
mmu-miR-292a-5p	chr7	3219200	3219221	+	22	14.6856	14.7074
mmu-miR-292a-3p	chr7	3219238	3219261	+	24	13.7522	13.972
mmu-miR-292b-5p	chr7	3219237	3219259	-	23	0.97777	0.663052
mmu-miR-292b-3p	chr7	3219198	3219218	-	21	0	0
mmu-miR-291b-5p	chr7	3219494	3219515	+	22	9.22205	9.28833
mmu-miR-291b-3p	chr7	3219529	3219550	+	22	7.31741	7.44041
mmu-miR-293-5p	chr7	3220356	3220377	+	22	13.5281	13.625
mmu-miR-293-3p	chr7	3220390	3220411	+	22	13.4423	13.5327
mmu-miR-294-5p	chr7	3220655	3220676	+	22	8.49447	8.71391
mmu-miR-294-3p	chr7	3220691	3220712	+	22	13.7193	13.8635
mmu-miR-295-5p	chr7	3220779	3220800	+	22	9.41878	9.30307
mmu-miR-295-3p	chr7	3220815	3220837	+	23	16.7778	16.8584
mmu-miR-935	chr7	3415120	3415143	+	24	6.02196	5.66082
mmu-miR-3572-3p	chr7	3656010	3656032	+	23	0	0
mmu-miR-3572-5p	chr7	3655970	3655991	+	22	0	0
mmu-miR-3099-5p	chr7	6803600	6803620	+	21	0	0
mmu-miR-3099-3p	chr7	6803638	6803659	+	22	0	0.663052
mmu-miR-5620-5p	chr7	7298891	7298913	+	23	0	0
mmu-miR-5620-3p	chr7	7298926	7298946	+	21	0	0
mmu-miR-3100-5p	chr7	19086828	19086850	+	23	0	0.663052
mmu-miR-3100-3p	chr7	19086872	19086892	+	21	0	0
mmu-miR-330-5p	chr7	19181486	19181507	+	22	8.35407	8.07972
mmu-miR-330-3p	chr7	19181525	19181547	+	23	5.00097	4.96986
mmu-miR-343	chr7	19386688	19386707	+	20	0	0
mmu-miR-7046-5p	chr7	24970047	24970070	-	24	0	0.663052
mmu-miR-7046-3p	chr7	24970010	24970031	-	22	3.13017	2.89098
mmu-miR-7047-5p	chr7	24987640	24987662	-	23	0	0
mmu-miR-7047-3p	chr7	24987606	24987628	-	23	0	0
mmu-miR-6537-5p	chr7	25097120	25097141	-	22	0	0
mmu-miR-6537-3p	chr7	25097089	25097111	-	23	0	0
mmu-miR-7048-5p	chr7	25217699	25217720	-	22	0	0
mmu-miR-7048-3p	chr7	25217668	25217688	-	21	0	0
mmu-miR-3101-5p	chr7	27176058	27176078	-	21	0.570181	0
mmu-miR-3101-3p	chr7	27176020	27176040	-	21	0	0
mmu-miR-1191a	chr7	27205615	27205635	+	21	5.44806	5.30401
mmu-miR-7049-5p	chr7	28560957	28560979	-	23	1.29521	0.663052
mmu-miR-7049-3p	chr7	28560925	28560945	-	21	0	0
mmu-miR-1963	chr7	29083671	29083693	-	23	0.97777	0
mmu-miR-1964-5p	chr7	29773305	29773326	+	22	0	0
mmu-miR-1964-3p	chr7	29773344	29773365	+	22	0	0
mmu-miR-7668-5p	chr7	29906509	29906532	+	24	1.29521	0
mmu-miR-7668-3p	chr7	29906546	29906567	+	22	0.570181	0
mmu-miR-9769-5p	chr7	30552839	30552860	+	22	0	0
mmu-miR-9769-3p	chr7	30552871	30552892	+	22	3.60268	3.44868
mmu-miR-3569-5p	chr7	30589380	30589400	+	21	0.97777	0
mmu-miR-3569-3p	chr7	30589416	30589437	+	22	0	0
mmu-miR-7050-5p	chr7	31040292	31040312	-	21	0	0
mmu-miR-7050-3p	chr7	31040258	31040278	-	21	0	0
mmu-miR-7051-5p	chr7	43457502	43457523	+	22	0	0
mmu-miR-7051-3p	chr7	43457546	43457567	+	22	0	0
mmu-miR-7052-5p	chr7	44470352	44470372	+	21	0	0
mmu-miR-7052-3p	chr7	44470391	44470411	+	21	0	0
mmu-miR-7053-5p	chr7	44538153	44538173	-	21	0	0
mmu-miR-7053-3p	chr7	44538106	44538126	-	21	1.55525	1.45958
mmu-miR-707	chr7	44849705	44849725	+	21	0	0
mmu-miR-7054-5p	chr7	45012458	45012482	-	25	0.570181	0.663052
mmu-miR-7054-3p	chr7	45012426	45012445	-	20	1.29521	2.34596
mmu-miR-150-5p	chr7	45121762	45121783	+	22	10.2681	10.2281
mmu-miR-150-3p	chr7	45121798	45121819	+	22	2.1352	3.66318
mmu-miR-5121	chr7	45126925	45126945	-	21	7.72027	7.75289
mmu-miR-7055-5p	chr7	45173303	45173323	+	21	0	0
mmu-miR-7055-3p	chr7	45173339	45173361	+	23	0	0
mmu-miR-7056-5p	chr7	47083203	47083224	-	22	0	0
mmu-miR-7056-3p	chr7	47083166	47083187	-	22	0	0
mmu-miR-6238	chr7	53891796	53891817	-	22	0	0
mmu-miR-6389	chr7	57581070	57581090	+	21	0	0
mmu-miR-344d-3p	chr7	61683127	61683148	-	22	0	0
mmu-miR-344d-1-5p	chr7	61683166	61683189	-	24	0	0
mmu-miR-344d-2-5p	chr7	61685318	61685341	-	24	0	0
mmu-miR-344d-3-5p	chr7	61726296	61726318	-	23	0	0
mmu-miR-344e-5p	chr7	61735579	61735598	-	20	0	0
mmu-miR-344e-3p	chr7	61735539	61735560	-	22	0	0
mmu-miR-344h-5p	chr7	61739390	61739409	-	20	0	0
mmu-miR-344h-3p	chr7	61739350	61739371	-	22	0	0
mmu-miR-344b-5p	chr7	61790556	61790578	-	23	0	0
mmu-miR-344b-3p	chr7	61790522	61790543	-	22	1.29521	0.663052
mmu-miR-344c-5p	chr7	61837363	61837385	-	23	0	0
mmu-miR-344c-3p	chr7	61837323	61837345	-	23	0	0
mmu-miR-344-5p	chr7	61877819	61877844	-	26	0	0
mmu-miR-344-3p	chr7	61877782	61877804	-	23	1.29521	1.73713
mmu-miR-344g-5p	chr7	61982335	61982355	-	21	0	0
mmu-miR-344g-3p	chr7	61982295	61982316	-	22	0	0
mmu-miR-344f-5p	chr7	62046225	62046246	-	22	0	0
mmu-miR-344f-3p	chr7	62046183	62046203	-	21	0	0
mmu-miR-344i	chr7	62085281	62085300	-	20	0	0
mmu-miR-211-5p	chr7	64205831	64205852	+	22	6.73697	5.77282
mmu-miR-211-3p	chr7	64205868	64205888	+	21	0.570181	0
mmu-miR-6416-5p	chr7	64250077	64250097	-	21	0	0
mmu-miR-6416-3p	chr7	64249989	64250009	-	21	0	0
mmu-miR-7057-5p	chr7	66381702	66381719	-	18	0.570181	0
mmu-miR-7057-3p	chr7	66381669	66381690	-	22	0	0
mmu-miR-7234-5p	chr7	73819590	73819612	+	23	0	0
mmu-miR-7234-3p	chr7	73819619	73819641	+	23	0	0
mmu-miR-7a-2-3p	chr7	78888335	78888356	+	22	2.1352	2.17011
mmu-miR-1839-5p	chr7	81529919	81529940	+	22	5.83861	5.55738
mmu-miR-1839-3p	chr7	81529958	81529980	+	23	3.13017	2.64405
mmu-miR-708-5p	chr7	96249450	96249472	+	23	8.51565	8.51199
mmu-miR-708-3p	chr7	96249496	96249517	+	22	9.32158	9.56993
mmu-miR-6394	chr7	96305740	96305760	+	21	0	0
mmu-miR-326-5p	chr7	99552288	99552311	+	24	0	0
mmu-miR-326-3p	chr7	99552328	99552348	+	21	4.38357	4.42089
mmu-miR-3102-5p	chr7	100882388	100882409	-	22	0	0.663052
mmu-miR-3102-5p.2-5p	chr7	100882367	100882387	-	21	3.13017	3.19661
mmu-miR-3102-3p.2-3p	chr7	100882330	100882350	-	21	3.76579	3.59516
mmu-miR-3102-3p	chr7	100882307	100882329	-	23	5.18522	5.70989
mmu-miR-139-5p	chr7	101475382	101475403	+	22	2.66262	2.50269
mmu-miR-139-3p	chr7	101475418	101475439	+	22	0.97777	0
mmu-miR-7058-5p	chr7	126368013	126368036	-	24	0	0
mmu-miR-7058-3p	chr7	126367971	126367992	-	22	0	0
mmu-miR-7059-5p	chr7	126579506	126579527	-	22	0	1.1156
mmu-miR-7059-3p	chr7	126579474	126579495	-	22	0	0
mmu-miR-7060-5p	chr7	127489251	127489272	+	22	0.570181	0
mmu-miR-7060-3p	chr7	127489367	127489387	+	21	0	1.9698
mmu-miR-762	chr7	127708534	127708555	+	22	0	0
mmu-miR-3103-5p	chr7	128288414	128288434	-	21	0.570181	0.663052
mmu-miR-3103-3p	chr7	128288370	128288391	-	22	2.28619	2.64405
mmu-miR-7061-5p	chr7	130908273	130908294	+	22	0	0
mmu-miR-7061-3p	chr7	130908314	130908335	+	22	0	0.663052
mmu-miR-1962	chr7	135566234	135566255	+	22	0	0
mmu-miR-6401	chr7	139779085	139779106	+	22	0	0
mmu-miR-7686-5p	chr7	139957598	139957622	-	25	0	0
mmu-miR-7686-3p	chr7	139957566	139957587	-	22	0	0
mmu-miR-202-5p	chr7	139957732	139957752	-	21	0.570181	0
mmu-miR-202-3p	chr7	139957695	139957716	-	22	0	0
mmu-miR-7062-5p	chr7	139986846	139986869	-	24	0	0
mmu-miR-7062-3p	chr7	139986809	139986831	-	23	0	0
mmu-miR-210-5p	chr7	141221445	141221466	-	22	9.25676	8.74367
mmu-miR-210-3p	chr7	141221407	141221428	-	22	9.78576	9.39595
mmu-miR-7063-5p	chr7	141620706	141620728	+	23	1.77549	1.1156
mmu-miR-7063-3p	chr7	141620772	141620791	+	20	0.97777	0.663052
mmu-miR-3104-5p	chr7	141992180	141992204	+	25	0	0
mmu-miR-3104-3p	chr7	141992218	141992240	+	23	0	0
mmu-miR-675-5p	chr7	142577112	142577133	-	22	0	0
mmu-miR-675-3p	chr7	142577078	142577099	-	22	0	0
mmu-miR-483-5p	chr7	142654968	142654989	-	22	0	1.1156
mmu-miR-483-3p	chr7	142654932	142654952	-	21	0.570181	0
mmu-miR-7064-5p	chr7	143570731	143570754	-	24	0.570181	0.663052
mmu-miR-7064-3p	chr7	143570673	143570693	-	21	0.570181	1.1156
mmu-miR-6404	chr7	143933171	143933191	+	21	0	0
mmu-miR-3105-5p	chr7	144009267	144009288	+	22	0	0
mmu-miR-3105-3p	chr7	144009304	144009325	+	22	1.77549	2.77279
mmu-miR-7654-5p	chr8	8690141	8690162	-	22	0.570181	1.1156
mmu-miR-7654-3p	chr8	8690093	8690114	-	22	0	0
mmu-miR-7238-5p	chr8	11635719	11635736	-	18	1.29521	0
mmu-miR-7238-3p	chr8	11635694	11635708	-	15	0	0
mmu-miR-9768-5p	chr8	12947953	12947975	+	23	0	0
mmu-miR-9768-3p	chr8	12948035	12948058	+	24	0	0
mmu-miR-7065-5p	chr8	13136077	13136097	+	21	0	0
mmu-miR-7065-3p	chr8	13136112	13136132	+	21	0	0
mmu-miR-1968-5p	chr8	13189068	13189091	-	24	5.94459	6.05189
mmu-miR-1968-3p	chr8	13189035	13189055	-	21	1.55525	1.1156
mmu-miR-3106-5p	chr8	16168805	16168825	-	21	0	0
mmu-miR-3106-3p	chr8	16168768	16168789	-	22	0	0
mmu-miR-486a-5p	chr8	23142587	23142608	+	22	7.15026	6.70414
mmu-miR-486a-3p	chr8	23142629	23142649	+	21	0	0
mmu-miR-486b-5p	chr8	23142627	23142648	-	22	7.13542	6.74395
mmu-miR-486b-3p	chr8	23142587	23142606	-	20	0	0
mmu-miR-8108	chr8	25159150	25159171	-	22	0	0
mmu-miR-6395	chr8	34166689	34166710	-	22	0.570181	1.73713
mmu-miR-383-5p	chr8	38252178	38252199	-	22	0	0
mmu-miR-383-3p	chr8	38252138	38252158	-	21	0	0
mmu-miR-7666-5p	chr8	40307908	40307929	-	22	0	0
mmu-miR-7666-3p	chr8	40307875	40307893	-	19	0.97777	0
mmu-miR-710	chr8	64514401	64514422	-	22	0	0
mmu-miR-7066-5p	chr8	70102560	70102581	-	22	0	0
mmu-miR-7066-3p	chr8	70102524	70102546	-	23	0	0
mmu-miR-7240-5p	chr8	70798135	70798155	+	21	0	1.45958
mmu-miR-7240-3p	chr8	70798172	70798192	+	21	0	0
mmu-miR-7067-5p	chr8	70895543	70895565	-	23	0.570181	0
mmu-miR-7067-3p	chr8	70895508	70895528	-	21	0.97777	1.1156
mmu-miR-1969	chr8	70925541	70925563	+	23	0	0
mmu-miR-6769b-5p	chr8	71631083	71631102	-	20	0	0
mmu-miR-6769b-3p	chr8	71631047	71631067	-	21	0	0.663052
mmu-miR-7068-5p	chr8	72470069	72470089	-	21	0.570181	1.73713
mmu-miR-7068-3p	chr8	72470016	72470036	-	21	6.91556	7.41104
mmu-miR-28b	chr8	73016523	73016543	+	21	0	0
mmu-miR-1668	chr8	83723903	83723923	-	21	0.570181	1.73713
mmu-miR-8111	chr8	84005704	84005724	+	21	0	0
mmu-miR-1199-5p	chr8	84011594	84011613	-	20	6.81357	6.41949
mmu-miR-1199-3p	chr8	84011549	84011569	-	21	4.31496	4.1157
mmu-miR-709	chr8	84086167	84086185	+	19	0	0
mmu-miR-181d-5p	chr8	84178759	84178781	-	23	11.5038	11.4699
mmu-miR-181d-3p	chr8	84178720	84178740	-	21	2.1352	2.50269
mmu-miR-181c-5p	chr8	84178924	84178945	-	22	12.6075	12.4853
mmu-miR-181c-3p	chr8	84178885	84178906	-	22	10.1145	10.0773
mmu-miR-23a-5p	chr8	84208527	84208548	+	22	0.570181	1.1156
mmu-miR-23a-3p	chr8	84208563	84208583	+	21	8.19613	8.06093
mmu-miR-27a-5p	chr8	84208685	84208706	+	22	5.97826	6.32816
mmu-miR-27a-3p	chr8	84208727	84208747	+	21	10.0999	10.1233
mmu-miR-24-2-5p	chr8	84208839	84208860	+	22	7.61005	7.21536
mmu-miR-3074-2-3p	chr8	84208839	84208858	-	20	0	0.663052
mmu-miR-7069-5p	chr8	84867952	84867974	+	23	0.570181	0
mmu-miR-7069-3p	chr8	84867987	84868007	+	21	0.570181	1.45958
mmu-miR-7070-5p	chr8	85062086	85062106	+	21	0	0
mmu-miR-7070-3p	chr8	85062152	85062171	+	20	2.54772	3.00021
mmu-miR-8109	chr8	85700935	85700955	+	21	0	0
mmu-miR-7071-5p	chr8	88138211	88138233	+	23	0	0
mmu-miR-7071-3p	chr8	88138254	88138274	+	21	1.55525	0
mmu-miR-8110	chr8	89024791	89024811	+	21	0	0
mmu-miR-138-5p	chr8	94324312	94324334	+	23	6.96117	6.9554
mmu-miR-138-2-3p	chr8	94324359	94324379	+	21	0.570181	0.663052
mmu-miR-7072-5p	chr8	94505051	94505072	+	22	0	0
mmu-miR-7072-3p	chr8	94505085	94505105	+	21	0	0
mmu-miR-7073-5p	chr8	95753188	95753209	-	22	1.29521	1.1156
mmu-miR-7073-3p	chr8	95753151	95753172	-	22	0.570181	0
mmu-miR-328-5p	chr8	105308419	105308440	-	22	1.96653	0
mmu-miR-328-3p	chr8	105308379	105308400	-	22	7.29977	7.02168
mmu-miR-1966-5p	chr8	105615481	105615505	+	25	0	0
mmu-miR-1966-3p	chr8	105615521	105615543	+	23	0	0.663052
mmu-miR-7074-5p	chr8	105951672	105951694	-	23	0	0
mmu-miR-7074-3p	chr8	105951637	105951659	-	23	0	0.663052
mmu-miR-7075-5p	chr8	107096081	107096101	-	21	0	0
mmu-miR-7075-3p	chr8	107096025	107096045	-	21	1.55525	1.73713
mmu-miR-140-5p	chr8	107551249	107551270	+	22	5.38252	4.76841
mmu-miR-140-3p	chr8	107551288	107551308	+	21	10.5841	10.4141
mmu-miR-3108-5p	chr8	108936870	108936892	+	23	0	0
mmu-miR-3108-3p	chr8	108936911	108936931	+	21	0	0
mmu-miR-3473d	chr8	111016498	111016521	-	24	6.04332	6.01332
mmu-miR-1957b	chr8	111450230	111450250	+	21	0	0
mmu-miR-7076-5p	chr8	111689649	111689669	-	21	0	0
mmu-miR-7076-3p	chr8	111689601	111689621	-	21	0	0
mmu-miR-7077-5p	chr8	117453025	117453045	+	21	0	0
mmu-miR-7077-3p	chr8	117453060	117453079	+	20	0.570181	0
mmu-miR-7078-5p	chr8	117459270	117459289	+	20	0	0
mmu-miR-7078-3p	chr8	117459308	117459328	+	21	0	0
mmu-miR-7687-5p	chr8	120538696	120538720	+	25	1.29521	1.45958
mmu-miR-7687-3p	chr8	120538734	120538754	+	21	0.570181	0.663052
mmu-miR-7237-5p	chr8	121978024	121978047	+	24	0.97777	0
mmu-miR-7237-3p	chr8	121978065	121978086	+	22	1.55525	1.45958
mmu-miR-6396	chr8	122622265	122622288	-	24	0	0
mmu-miR-7079-5p	chr8	123104980	123105001	+	22	0.97777	0.663052
mmu-miR-7079-3p	chr8	123105023	123105043	+	21	3.86511	4.49741
mmu-miR-7080-5p	chr8	123130106	123130128	+	23	0	0
mmu-miR-7080-3p	chr8	123130147	123130168	+	22	0	0
mmu-miR-1967	chr8	124022688	124022710	+	23	0	0
mmu-miR-21c	chr8	128278188	128278208	-	21	0	0
mmu-miR-1903	chr8	128359251	128359272	+	22	0	0
mmu-miR-101c	chr9	3038680	3038698	-	19	4.1671	4.2979
mmu-miR-5618-5p	chr9	7784390	7784409	+	20	0.570181	0
mmu-miR-5618-3p	chr9	7784423	7784440	+	18	0	0
mmu-miR-1899	chr9	8246796	8246817	+	22	0	0
mmu-miR-6237	chr9	9894484	9894506	+	23	0	0
mmu-miR-7650-5p	chr9	15312611	15312632	+	22	1.96653	0.663052
mmu-miR-7650-3p	chr9	15312648	15312669	+	22	0.570181	0
mmu-miR-7081-5p	chr9	20914134	20914159	-	26	0.97777	0
mmu-miR-7081-3p	chr9	20914091	20914112	-	22	0.570181	1.45958
mmu-miR-1900	chr9	21032261	21032282	-	22	0	0
mmu-miR-7082-5p	chr9	21075563	21075583	-	21	0	0
mmu-miR-7082-3p	chr9	21075499	21075520	-	22	2.42288	1.9698
mmu-miR-1946b	chr9	21613452	21613477	-	26	0	0
mmu-miR-7083-5p	chr9	21809975	21809995	-	21	3.13017	1.73713
mmu-miR-7083-3p	chr9	21809941	21809960	-	20	3.13017	3.28561
mmu-miR-7084-5p	chr9	22113988	22114008	-	21	0	0.663052
mmu-miR-7084-3p	chr9	22113951	22113972	-	22	0	0.663052
mmu-miR-100-5p	chr9	41531437	41531458	+	22	0.97777	0.663052
mmu-miR-100-3p	chr9	41531471	41531492	+	22	0	0
mmu-let-7a-2-3p	chr9	41536777	41536797	+	21	0	0
mmu-miR-125b-1-3p	chr9	41581980	41582001	+	22	3.048	3.84989
mmu-miR-7085-5p	chr9	44400428	44400449	+	22	0	0
mmu-miR-7085-3p	chr9	44400465	44400486	+	22	0	0
mmu-miR-7086-5p	chr9	45266682	45266702	-	21	0	0
mmu-miR-7086-3p	chr9	45266643	45266663	-	21	0	0
mmu-miR-7087-5p	chr9	45939565	45939585	-	21	0	0
mmu-miR-7087-3p	chr9	45939521	45939542	-	22	0	0
mmu-miR-34c-5p	chr9	51103076	51103098	-	23	8.06388	7.66853
mmu-miR-34c-3p	chr9	51103044	51103065	-	22	1.77549	1.45958
mmu-miR-34b-5p	chr9	51103610	51103632	-	23	3.35184	3.28561
mmu-miR-34b-3p	chr9	51103574	51103595	-	22	3.2079	2.50269
mmu-miR-6244	chr9	52115653	52115673	+	21	0	0
mmu-miR-130c	chr9	53400808	53400829	-	22	0	0
mmu-miR-5710	chr9	54708317	54708338	+	22	0	0
mmu-miR-6385	chr9	58221155	58221175	+	21	0	0
mmu-miR-5133	chr9	62122565	62122585	-	21	0.570181	0.663052
mmu-miR-190a-5p	chr9	67236700	67236721	-	22	5.10622	4.88694
mmu-miR-190a-3p	chr9	67236664	67236685	-	22	0	1.1156
mmu-miR-7241-5p	chr9	67727758	67727780	-	23	0	0
mmu-miR-7241-3p	chr9	67727717	67727738	-	22	0	0
mmu-miR-7242-5p	chr9	67729556	67729577	-	22	0	0
mmu-miR-7242-3p	chr9	67729499	67729520	-	22	0	0
mmu-miR-3109-5p	chr9	69456958	69456981	+	24	0.570181	0
mmu-miR-3109-3p	chr9	69456997	69457017	+	21	0.570181	0
mmu-miR-5626-5p	chr9	70405732	70405753	-	22	0	0
mmu-miR-5626-3p	chr9	70405694	70405715	-	22	0.570181	0
mmu-miR-184-3p	chr9	89802263	89802284	-	22	4.65738	3.72814
mmu-miR-184-5p	chr9	89802302	89802323	-	22	0	0
mmu-miR-6386	chr9	92267334	92267357	-	24	0	0
mmu-miR-7656-5p	chr9	94751829	94751850	+	22	0	0
mmu-miR-7656-3p	chr9	94751869	94751890	+	22	0	0
mmu-miR-7243-5p	chr9	102304956	102304975	-	20	0	0
mmu-miR-7243-3p	chr9	102304924	102304943	-	20	0	0
mmu-miR-2136	chr9	104426163	104426183	+	21	0	0
mmu-miR-135a-1-3p	chr9	106154179	106154200	+	22	0.97777	0.663052
mmu-let-7g-5p	chr9	106178846	106178867	+	22	7.64541	7.6972
mmu-let-7g-3p	chr9	106178902	106178923	+	22	2.1352	2.50269
mmu-miR-7088-5p	chr9	108081498	108081522	+	25	0	0
mmu-miR-7088-3p	chr9	108081560	108081581	+	22	0	0
mmu-miR-191-5p	chr9	108568325	108568347	+	23	14.103	14.0815
mmu-miR-191-3p	chr9	108568367	108568388	+	22	5.72421	5.9191
mmu-miR-425-5p	chr9	108568789	108568811	+	23	9.12895	9.25566
mmu-miR-425-3p	chr9	108568830	108568850	+	21	5.00097	4.63927
mmu-miR-711	chr9	108969970	108969991	+	22	0	0
mmu-miR-7089-5p	chr9	109889648	109889671	+	24	0.97777	0
mmu-miR-7089-3p	chr9	109889689	109889710	+	22	0.97777	0.663052
mmu-miR-6236	chr9	110281353	110281371	+	19	0	0
mmu-miR-8107	chr9	110636065	110636085	-	21	0	0
mmu-miR-128-2-5p	chr9	112118679	112118701	-	23	0	0
mmu-miR-467h	chr9	115381898	115381919	+	22	0.570181	0
mmu-miR-26a-1-3p	chr9	119031850	119031871	+	22	0	0
mmu-miR-7090-5p	chr9	120955089	120955111	+	23	0	0
mmu-miR-7090-3p	chr9	120955128	120955147	+	20	0	1.45958
mmu-miR-8106	chr9	122273930	122273951	-	22	0	0
mmu-miR-138-1-3p	chr9	122682936	122682957	+	22	1.96653	0.663052
mmu-miR-500-5p	chrX	7237730	7237754	-	25	0.570181	0.663052
mmu-miR-500-3p	chrX	7237695	7237716	-	22	3.13017	3.00021
mmu-miR-501-5p	chrX	7241307	7241328	-	22	0	1.1156
mmu-miR-501-3p	chrX	7241270	7241291	-	22	4.27939	4.1157
mmu-miR-362-5p	chrX	7242019	7242042	-	24	0.570181	1.45958
mmu-miR-362-3p	chrX	7241984	7242005	-	22	2.96087	2.64405
mmu-miR-188-5p	chrX	7248031	7248051	-	21	4.95661	4.57008
mmu-miR-188-3p	chrX	7247992	7248012	-	21	2.1352	0.663052
mmu-miR-532-5p	chrX	7248456	7248477	-	22	8.35621	8.05778
mmu-miR-532-3p	chrX	7248419	7248440	-	22	3.48271	3.44868
mmu-miR-1198-5p	chrX	7807142	7807163	+	22	6.63512	6.48673
mmu-miR-1198-3p	chrX	7807180	7807201	+	22	0.570181	2.77279
mmu-miR-221-5p	chrX	19146344	19146369	-	26	3.48271	2.77279
mmu-miR-221-3p	chrX	19146307	19146329	-	23	5.85077	6.03915
mmu-miR-222-5p	chrX	19146940	19146960	-	21	3.28166	3.84989
mmu-miR-222-3p	chrX	19146903	19146923	-	21	7.12042	7.28718
mmu-miR-5617-5p	chrX	20863160	20863182	-	23	0	0
mmu-miR-5617-3p	chrX	20863126	20863146	-	21	0	0
mmu-miR-3110-5p	chrX	38210453	38210473	+	21	0.570181	0
mmu-miR-3110-3p	chrX	38210488	38210509	+	22	0	0
mmu-miR-6384	chrX	52378155	52378174	-	20	0	0
mmu-miR-717	chrX	52422461	52422482	-	22	0	0
mmu-miR-363-5p	chrX	52741740	52741761	-	22	8.04282	8.43625
mmu-miR-363-3p	chrX	52741697	52741718	-	22	12.5139	12.7539
mmu-miR-92a-2-5p	chrX	52741892	52741913	-	22	3.35184	4.1157
mmu-miR-19b-2-5p	chrX	52742033	52742056	-	24	4.20551	4.38105
mmu-miR-20b-5p	chrX	52742159	52742181	-	23	10.1233	10.1904
mmu-miR-20b-3p	chrX	52742122	52742143	-	22	6.08513	6.46784
mmu-miR-18b-5p	chrX	52742381	52742403	-	23	9.46206	9.73607
mmu-miR-18b-3p	chrX	52742342	52742363	-	22	7.46719	7.7372
mmu-miR-106a-5p	chrX	52742541	52742563	-	23	10.2817	10.3479
mmu-miR-106a-3p	chrX	52742505	52742527	-	23	3.48271	2.34596
mmu-miR-450b-5p	chrX	53048044	53048065	-	22	8.90073	8.98703
mmu-miR-450b-3p	chrX	53048008	53048029	-	22	1.55525	2.64405
mmu-miR-450a-5p	chrX	53048206	53048227	-	22	6.49484	6.67148
mmu-miR-450a-1-3p	chrX	53048171	53048192	-	22	0.97777	2.17011
mmu-miR-450a-2-3p	chrX	53048304	53048325	-	22	0.570181	0.663052
mmu-miR-542-5p	chrX	53049453	53049474	-	22	3.60268	3.19661
mmu-miR-542-3p	chrX	53049415	53049436	-	22	6.58501	6.79031
mmu-miR-351-5p	chrX	53053315	53053338	-	24	9.06641	9.54761
mmu-miR-351-3p	chrX	53053276	53053296	-	21	0.570181	0.663052
mmu-miR-503-5p	chrX	53054027	53054049	-	23	0.97777	2.34596
mmu-miR-503-3p	chrX	53053987	53054008	-	22	1.77549	1.9698
mmu-miR-322-5p	chrX	53054306	53054327	-	22	7.10526	7.32442
mmu-miR-322-3p	chrX	53054269	53054289	-	21	4.48073	4.85821
mmu-miR-5116	chrX	56587892	56587912	-	21	0	0
mmu-miR-504-5p	chrX	59097705	59097726	-	22	1.96653	2.17011
mmu-miR-504-3p	chrX	59097669	59097690	-	22	0	0
mmu-miR-505-5p	chrX	60394451	60394473	-	23	2.28619	1.9698
mmu-miR-505-3p	chrX	60394416	60394437	-	22	1.96653	0.663052
mmu-miR-743a-5p	chrX	66776794	66776815	-	22	0.97777	0.663052
mmu-miR-743a-3p	chrX	66776760	66776781	-	22	0.570181	0.663052
mmu-miR-743b-5p	chrX	66777302	66777322	-	21	0.570181	0.663052
mmu-miR-743b-3p	chrX	66777266	66777287	-	22	2.76903	2.34596
mmu-miR-742-5p	chrX	66780412	66780432	-	21	0	0
mmu-miR-742-3p	chrX	66780376	66780397	-	22	0	0
mmu-miR-883a-5p	chrX	66780803	66780824	-	22	0.570181	0
mmu-miR-883a-3p	chrX	66780768	66780789	-	22	1.29521	0.663052
mmu-miR-883b-5p	chrX	66789936	66789957	-	22	0.570181	0.663052
mmu-miR-883b-3p	chrX	66789900	66789921	-	22	0	0
mmu-miR-471-5p	chrX	66792634	66792655	-	22	0	0
mmu-miR-471-3p	chrX	66792599	66792620	-	22	0.570181	0
mmu-miR-741-5p	chrX	66796847	66796869	-	23	0	0.663052
mmu-miR-741-3p	chrX	66796809	66796831	-	23	0.97777	1.1156
mmu-miR-463-5p	chrX	66799273	66799294	-	22	3.28166	3.00021
mmu-miR-463-3p	chrX	66799236	66799257	-	22	0	0
mmu-miR-880-5p	chrX	66800577	66800597	-	21	0	0
mmu-miR-880-3p	chrX	66800540	66800561	-	22	0.570181	1.1156
mmu-miR-878-5p	chrX	66801554	66801575	-	22	2.76903	3.00021
mmu-miR-878-3p	chrX	66801518	66801539	-	22	1.29521	0
mmu-miR-881-5p	chrX	66801986	66802007	-	22	0	0.663052
mmu-miR-881-3p	chrX	66801954	66801975	-	22	4.1671	3.44868
mmu-miR-871-5p	chrX	66810472	66810494	-	23	2.76903	2.64405
mmu-miR-871-3p	chrX	66810438	66810460	-	23	5.9217	5.59269
mmu-miR-470-5p	chrX	66813995	66814017	-	23	6.01116	5.97369
mmu-miR-470-3p	chrX	66813961	66813982	-	22	0	0
mmu-miR-465d-5p	chrX	66822691	66822713	-	23	0	0
mmu-miR-465d-3p	chrX	66822656	66822677	-	22	0	0
mmu-miR-465c-5p	chrX	66826004	66826025	-	22	4.71176	4.57008
mmu-miR-465c-3p	chrX	66825965	66825986	-	22	4.44907	4.5342
mmu-miR-465b-5p	chrX	66829249	66829270	-	22	2.76903	3.19661
mmu-miR-465b-3p	chrX	66829212	66829233	-	22	4.48073	4.5342
mmu-miR-465a-5p	chrX	66839099	66839121	-	23	0.97777	1.1156
mmu-miR-465a-3p	chrX	66839063	66839084	-	22	4.48073	4.5342
mmu-miR-201-5p	chrX	67988135	67988156	-	22	0.570181	0
mmu-miR-201-3p	chrX	67988099	67988121	-	23	0	0
mmu-miR-547-5p	chrX	67988420	67988440	-	21	0	0
mmu-miR-547-3p	chrX	67988383	67988403	-	21	0	0.663052
mmu-miR-509-5p	chrX	68010149	68010170	-	22	0	0
mmu-miR-509-3p	chrX	68010115	68010135	-	21	0	0
mmu-miR-224-5p	chrX	72261085	72261105	-	21	4.1671	3.7903
mmu-miR-224-3p	chrX	72261037	72261058	-	22	0	0
mmu-miR-452-5p	chrX	72262271	72262292	-	22	1.77549	2.34596
mmu-miR-452-3p	chrX	72262235	72262256	-	22	0.570181	0
mmu-miR-767	chrX	72590050	72590070	-	21	0	0
mmu-miR-105	chrX	72591547	72591569	-	23	0	0
mmu-miR-2137	chrX	72992113	72992133	+	21	0.570181	0.663052
mmu-miR-5132-5p	chrX	74023571	74023591	-	21	0	0.663052
mmu-miR-5132-3p	chrX	74023534	74023554	-	21	0.570181	0
mmu-miR-718	chrX	74023857	74023877	-	21	0	0
mmu-miR-7091-5p	chrX	74274083	74274105	-	23	0.97777	0
mmu-miR-7091-3p	chrX	74274027	74274047	-	21	1.29521	1.45958
mmu-miR-7092-5p	chrX	74317367	74317389	+	23	0	0
mmu-miR-7092-3p	chrX	74317406	74317429	+	24	0	0
mmu-miR-7673-5p	chrX	94274574	94274595	+	22	0	0
mmu-miR-7673-3p	chrX	94274615	94274637	+	23	0	0
mmu-miR-223-5p	chrX	96242842	96242864	+	23	0	0
mmu-miR-223-3p	chrX	96242884	96242905	+	22	0	0
mmu-miR-676-5p	chrX	100381114	100381135	+	22	4.97896	4.20968
mmu-miR-676-3p	chrX	100381151	100381171	+	21	7.88907	7.65606
mmu-miR-421-5p	chrX	103572966	103572986	-	21	2.66262	2.50269
mmu-miR-421-3p	chrX	103572930	103572952	-	23	9.68232	9.63065
mmu-miR-374b-5p	chrX	103573112	103573133	-	22	5.26012	5.48405
mmu-miR-374b-3p	chrX	103573075	103573096	-	22	0	0
mmu-miR-374c-5p	chrX	103573086	103573105	+	20	0	0
mmu-miR-374c-3p	chrX	103573113	103573131	+	19	0	0
mmu-miR-672-5p	chrX	104116228	104116250	-	23	7.71363	8.0226
mmu-miR-672-3p	chrX	104116192	104116212	-	21	1.55525	1.73713
mmu-miR-384-5p	chrX	105344332	105344354	-	23	0	0
mmu-miR-384-3p	chrX	105344292	105344313	-	22	0	0
mmu-miR-325-5p	chrX	105379142	105379164	-	23	0	0
mmu-miR-325-3p	chrX	105379105	105379126	-	22	0	0
mmu-miR-6382	chrX	106309909	106309932	+	24	0	0
mmu-miR-361-5p	chrX	113074867	113074888	-	22	7.65238	7.70529
mmu-miR-361-3p	chrX	113074827	113074851	-	25	6.2319	5.83312
mmu-miR-3112-5p	chrX	134075330	134075350	+	21	1.55525	0.663052
mmu-miR-3112-3p	chrX	134075366	134075386	+	21	0.570181	0
mmu-miR-7093-5p	chrX	134757636	134757657	+	22	0.570181	0
mmu-miR-7093-3p	chrX	134757711	134757731	+	21	0	0
mmu-miR-7646-5p	chrX	135746716	135746737	+	22	1.29521	0.663052
mmu-miR-7646-3p	chrX	135746749	135746769	+	21	0	0
mmu-miR-1970	chrX	135786174	135786196	-	23	0	0
mmu-miR-6383	chrX	136183262	136183282	+	21	0	0
mmu-miR-3475-3p	chrX	140310992	140311012	+	21	3.13017	3.19661
mmu-miR-3475-5p	chrX	140310949	140310970	+	22	0	0
mmu-miR-652-5p	chrX	142739020	142739043	+	24	1.77549	0
mmu-miR-652-3p	chrX	142739060	142739080	+	21	6.26865	6.16178
mmu-miR-3472	chrX	145039390	145039414	+	25	0	0
mmu-miR-3552	chrX	146999424	146999444	+	21	0	0
mmu-miR-764-5p	chrX	147002285	147002303	+	19	0	0
mmu-miR-764-3p	chrX	147002324	147002345	+	22	0	0
mmu-miR-1912-5p	chrX	147009456	147009477	+	22	0	0
mmu-miR-1912-3p	chrX	147009493	147009514	+	22	0	0
mmu-miR-1264-5p	chrX	147010614	147010635	+	22	0	0
mmu-miR-1264-3p	chrX	147010655	147010676	+	22	0	0
mmu-miR-1298-5p	chrX	147064918	147064939	+	22	0	0
mmu-miR-1298-3p	chrX	147064970	147064991	+	22	0	0
mmu-miR-448-5p	chrX	147158221	147158242	+	22	0	0
mmu-miR-448-3p	chrX	147158281	147158302	+	22	0	0
mmu-miR-3620-5p	chrX	150547424	150547445	-	22	0	0
mmu-miR-3620-3p	chrX	150547385	150547406	-	22	0	0
mmu-miR-3113-5p	chrX	151859575	151859596	+	22	0	0
mmu-miR-3113-3p	chrX	151859606	151859625	+	20	0	0
mmu-let-7f-2-3p	chrX	151912403	151912423	+	21	2.1352	2.17011
mmu-miR-98-5p	chrX	151913229	151913250	+	22	4.76417	4.82889
mmu-miR-98-3p	chrX	151913287	151913308	+	22	3.28166	3.84989
mmu-miR-3473a	chrX	162874920	162874937	-	18	0	0

## Sheet: mirbase_mmu21_log2+1_counts_IP
Table S2: RIP-seq log2+1 of CPM values in Input WT and AGO1 RIP. Related to Fig S4.
Geneid	Chr	Start	End	Strand	Length	Input_E14	RIP_E14_AGO1
mmu-miR-6341	chr1	12426016	12426038	+	23	0	0
mmu-miR-206-5p	chr1	20679017	20679039	+	23	0	0
mmu-miR-206-3p	chr1	20679055	20679076	+	22	0	0
mmu-miR-133b-5p	chr1	20682797	20682818	+	22	0	0
mmu-miR-133b-3p	chr1	20682834	20682855	+	22	0	0
mmu-miR-30a-5p	chr1	23272274	23272295	+	22	13.6282	14.0707
mmu-miR-30a-3p	chr1	23272315	23272336	+	22	8.23926	9.29182
mmu-miR-30c-5p	chr1	23291714	23291736	+	23	12.0806	11.0968
mmu-miR-30c-2-3p	chr1	23291754	23291775	+	22	5.81292	6.76353
mmu-miR-6342	chr1	29421552	29421573	+	22	0	0
mmu-miR-6896-5p	chr1	34117364	34117385	+	22	0	0
mmu-miR-6896-3p	chr1	34117408	34117429	+	22	0	0
mmu-miR-5103	chr1	34433130	34433149	-	20	0	0
mmu-miR-6897-5p	chr1	36144290	36144312	-	23	0	0
mmu-miR-6897-3p	chr1	36144252	36144272	-	21	0	0
mmu-miR-6898-5p	chr1	36348732	36348753	-	22	0	0
mmu-miR-6898-3p	chr1	36348688	36348708	-	21	0	0
mmu-miR-6349	chr1	39186908	39186929	-	22	0	0
mmu-miR-6350	chr1	47467097	47467117	-	21	0	0
mmu-miR-7681-5p	chr1	53849424	53849443	+	20	0	0
mmu-miR-7681-3p	chr1	53849474	53849495	+	22	0	0
mmu-miR-6899-5p	chr1	64042476	64042496	-	21	0	0
mmu-miR-6899-3p	chr1	64042438	64042460	-	23	0	0
mmu-miR-6351	chr1	73855553	73855575	-	23	0	0
mmu-miR-1928	chr1	74206562	74206578	-	17	0	0
mmu-miR-26b-5p	chr1	74394324	74394344	+	21	10.2053	10.1781
mmu-miR-26b-3p	chr1	74394360	74394381	+	22	3.84657	4.72429
mmu-miR-375-5p	chr1	74900696	74900717	-	22	0	0
mmu-miR-375-3p	chr1	74900661	74900682	-	22	5.89634	6.45856
mmu-miR-6343	chr1	76509620	76509641	+	22	0	0
mmu-miR-6352	chr1	77496731	77496752	-	22	0	0
mmu-miR-6344	chr1	82131926	82131947	+	22	0	0
mmu-miR-6353	chr1	84218926	84218948	-	23	0	0
mmu-miR-5126	chr1	84695890	84695911	+	22	5.10704	3.21423
mmu-miR-8096	chr1	85751983	85752002	+	20	0	0
mmu-miR-3535	chr1	86352062	86352087	-	26	0	3.46664
mmu-miR-6900-5p	chr1	92464514	92464537	-	24	0	0
mmu-miR-6900-3p	chr1	92464483	92464503	-	21	0	0
mmu-miR-149-5p	chr1	92850381	92850403	+	23	9.79953	8.71344
mmu-miR-149-3p	chr1	92850421	92850442	+	22	0	0
mmu-miR-6901-5p	chr1	93274554	93274573	+	20	0	4.03372
mmu-miR-6901-3p	chr1	93274585	93274604	+	20	0	0
mmu-miR-6902-5p	chr1	93346097	93346118	+	22	0	0
mmu-miR-6902-3p	chr1	93346135	93346155	+	21	0	0
mmu-miR-6345	chr1	93352191	93352211	+	21	0	0
mmu-miR-3473f	chr1	106546536	106546555	-	20	0	0
mmu-miR-6346	chr1	118954278	118954299	+	22	0	0
mmu-miR-128-1-5p	chr1	128202369	128202389	+	21	4.70588	6.03278
mmu-miR-128-3p	chr1	128202404	128202424	+	21	9.83432	9.71274
mmu-miR-135b-5p	chr1	132198103	132198125	+	23	7.6686	6.67444
mmu-miR-135b-3p	chr1	132198142	132198163	+	22	7.07529	6.15756
mmu-miR-6903-5p	chr1	133726619	133726640	-	22	0	0
mmu-miR-6903-3p	chr1	133726564	133726583	-	20	0	0
mmu-miR-1231-5p	chr1	135454661	135454683	-	23	0	0
mmu-miR-1231-3p	chr1	135454603	135454625	-	23	0	0
mmu-miR-181a-5p	chr1	137966468	137966490	+	23	6.15533	6.51563
mmu-miR-181a-1-3p	chr1	137966508	137966529	+	22	0	1.75099
mmu-miR-181b-5p	chr1	137966650	137966672	+	23	6.04997	5.85254
mmu-miR-181b-1-3p	chr1	137966690	137966708	+	19	0	0
mmu-miR-7682-5p	chr1	151442393	151442416	+	24	0	0
mmu-miR-7682-3p	chr1	151442430	151442450	+	21	2.94352	0
mmu-miR-8114	chr1	153899989	153900009	+	21	2.94352	3.86829
mmu-miR-488-5p	chr1	158505651	158505671	+	21	0	0
mmu-miR-488-3p	chr1	158505689	158505709	+	21	0	5.4458
mmu-miR-1843b-5p	chr1	159340362	159340382	+	21	3.46458	4.72429
mmu-miR-1843b-3p	chr1	159340400	159340419	+	20	4.1483	3.21423
mmu-miR-1927	chr1	160295885	160295907	-	23	0	0
mmu-miR-199a-5p	chr1	162217844	162217866	+	23	0	0
mmu-miR-199a-3p	chr1	162217883	162217904	+	22	6.34544	7.38547
mmu-miR-214-5p	chr1	162223397	162223418	+	22	0	0
mmu-miR-214-3p	chr1	162223438	162223459	+	22	0	0
mmu-miR-6347	chr1	167290125	167290146	+	22	0	0
mmu-miR-6348	chr1	168490740	168490761	+	22	0	0
mmu-miR-6354	chr1	169019041	169019061	-	21	0	0
mmu-miR-6546-5p	chr1	171064629	171064652	-	24	4.79553	4.96187
mmu-miR-6546-3p	chr1	171064591	171064611	-	21	0	0.670366
mmu-miR-7683-5p	chr1	171641879	171641900	-	22	0	0
mmu-miR-7683-3p	chr1	171641840	171641860	-	21	0	0
mmu-miR-350-5p	chr1	176772382	176772400	-	19	4.95968	4.13433
mmu-miR-350-3p	chr1	176772342	176772363	-	22	0	0
mmu-miR-6904-5p	chr1	180587206	180587227	+	22	0	0
mmu-miR-6904-3p	chr1	180587243	180587260	+	18	0	0
mmu-miR-1981-5p	chr1	184822465	184822488	-	24	6.04997	7.14742
mmu-miR-1981-3p	chr1	184822409	184822429	-	21	4.1483	6.72371
mmu-miR-664-5p	chr1	185242975	185242995	+	21	4.27839	6.15756
mmu-miR-664-3p	chr1	185243012	185243033	+	22	4.70588	4.22838
mmu-miR-194-5p	chr1	185313325	185313346	+	22	5.17543	6.2834
mmu-miR-194-1-3p	chr1	185313360	185313381	+	22	0	0
mmu-miR-215-5p	chr1	185313610	185313630	+	21	0	4.18212
mmu-miR-215-3p	chr1	185313647	185313667	+	21	0	0
mmu-miR-3473c	chr1	191998602	191998623	-	22	0	0
mmu-miR-205-5p	chr1	193507503	193507524	-	22	10.5413	10.9698
mmu-miR-205-3p	chr1	193507467	193507488	-	22	5.9752	0.670366
mmu-miR-3962	chr1	194822035	194822054	+	20	0	0
mmu-miR-29b-3p	chr1	195037091	195037113	+	23	3.84657	2.1855
mmu-miR-29b-2-5p	chr1	195037050	195037074	+	25	0	0
mmu-miR-29c-5p	chr1	195037562	195037583	+	22	4.27839	0
mmu-miR-29c-3p	chr1	195037600	195037621	+	22	4.70588	1.47219
mmu-miR-5104	chr10	7836441	7836464	+	24	0	0
mmu-miR-6413	chr10	20297593	20297613	-	21	0	0
mmu-miR-7663-5p	chr10	22729410	22729432	-	23	0	0
mmu-miR-7663-3p	chr10	22729372	22729393	-	22	0	0
mmu-miR-6905-5p	chr10	24910669	24910691	+	23	0	0
mmu-miR-6905-3p	chr10	24910711	24910731	+	21	0	0
mmu-miR-3473b	chr10	41670774	41670793	+	20	0	0
mmu-miR-1929-5p	chr10	44359692	44359714	+	23	0	0
mmu-miR-1929-3p	chr10	44359734	44359755	+	22	0	0
mmu-miR-6906-5p	chr10	60126777	60126800	+	24	0	0
mmu-miR-6906-3p	chr10	60126813	60126833	+	21	0	0
mmu-miR-6408	chr10	60923077	60923100	+	24	0	0
mmu-miR-466j	chr10	60960802	60960824	+	23	0	0
mmu-miR-5108	chr10	61774795	61774813	+	19	3.46458	4.72429
mmu-miR-7662-5p	chr10	62194206	62194227	-	22	0	0
mmu-miR-7662-3p	chr10	62194167	62194190	-	24	0	0
mmu-miR-7215-5p	chr10	62682508	62682532	+	25	0	0
mmu-miR-7215-3p	chr10	62682536	62682558	+	23	0	0
mmu-miR-6409	chr10	76008993	76009015	+	23	0	0
mmu-miR-678	chr10	76207333	76207354	-	22	0	0
mmu-miR-1930-5p	chr10	77641236	77641257	+	22	1.41858	0
mmu-miR-1930-3p	chr10	77641274	77641295	+	22	0	0
mmu-miR-7659-5p	chr10	78340186	78340207	-	22	0	0
mmu-miR-7659-3p	chr10	78340150	78340172	-	23	0	0
mmu-miR-6907-5p	chr10	78408522	78408543	-	22	0	0
mmu-miR-6907-3p	chr10	78408477	78408499	-	23	0	0
mmu-miR-6410	chr10	78434803	78434824	+	22	0	0
mmu-miR-6908-5p	chr10	78445131	78445152	-	22	0	0
mmu-miR-6908-3p	chr10	78445095	78445116	-	22	0	0
mmu-miR-6909-5p	chr10	79531064	79531085	-	22	0	0
mmu-miR-6909-3p	chr10	79531029	79531050	-	22	0	0
mmu-miR-6910-5p	chr10	79862592	79862614	+	23	0	0
mmu-miR-6910-3p	chr10	79862629	79862650	+	22	0	0
mmu-miR-6911-5p	chr10	80278169	80278191	+	23	0	0
mmu-miR-6911-3p	chr10	80278212	80278232	+	21	2.11983	1.75099
mmu-miR-6912-5p	chr10	80609265	80609286	+	22	0	0
mmu-miR-6912-3p	chr10	80609305	80609329	+	25	0	0
mmu-miR-1982-5p	chr10	80828808	80828827	+	20	0	0
mmu-miR-1982-3p	chr10	80828848	80828870	+	23	0	0
mmu-miR-5615-5p	chr10	81104652	81104673	-	22	0	0
mmu-miR-5615-3p	chr10	81104614	81104635	-	22	0	0
mmu-miR-3057-5p	chr10	81271610	81271633	+	24	6.59057	7.83743
mmu-miR-3057-3p	chr10	81271654	81271675	+	22	0	0
mmu-miR-6913-5p	chr10	81386352	81386373	+	22	0	0
mmu-miR-6913-3p	chr10	81386390	81386412	+	23	0	3.92557
mmu-miR-1191b-5p	chr10	81416276	81416297	-	22	3.84657	2.36186
mmu-miR-1191b-3p	chr10	81416240	81416261	-	22	0	0
mmu-miR-135a-5p	chr10	92072141	92072163	-	23	0	0
mmu-miR-135a-2-3p	chr10	92072104	92072124	-	21	0	0.670366
mmu-miR-1251-5p	chr10	92137190	92137210	-	21	0	0
mmu-miR-1251-3p	chr10	92137152	92137172	-	21	0	0
mmu-miR-1931	chr10	93162879	93162900	+	22	0	0.670366
mmu-miR-7688-5p	chr10	93433107	93433129	+	23	0	0
mmu-miR-7688-3p	chr10	93433142	93433162	+	21	0	0
mmu-miR-331-5p	chr10	93963817	93963838	-	22	0	1.47219
mmu-miR-331-3p	chr10	93963783	93963803	-	21	5.72437	6.73977
mmu-miR-7211-5p	chr10	94586178	94586199	-	22	0	0
mmu-miR-7211-3p	chr10	94586137	94586159	-	23	0	0
mmu-miR-3058-5p	chr10	95559286	95559308	-	23	0	0
mmu-miR-3058-3p	chr10	95559244	95559264	-	21	0	0
mmu-miR-3966	chr10	97423493	97423513	+	21	0	0
mmu-miR-3059-5p	chr10	101772704	101772725	+	22	0	0
mmu-miR-3059-3p	chr10	101772740	101772761	+	22	0	0
mmu-miR-6411	chr10	104287290	104287310	+	21	0	0
mmu-miR-763	chr10	120448052	120448073	-	22	0	0
mmu-miR-6412	chr10	122648412	122648433	+	22	0	0
mmu-miR-8104	chr10	122679336	122679357	+	22	0	0
mmu-let-7i-5p	chr10	122985698	122985719	-	22	6.59057	6.13346
mmu-let-7i-3p	chr10	122985642	122985663	-	22	0	0
mmu-miR-378d	chr10	126710355	126710376	-	22	2.58968	1.12628
mmu-miR-26a-5p	chr10	126995543	126995564	+	22	13.5806	14.0877
mmu-miR-26a-2-3p	chr10	126995581	126995602	+	22	0	0
mmu-miR-546	chr10	126998471	126998486	+	16	0	0
mmu-miR-677-5p	chr10	128085291	128085312	+	22	4.1483	0
mmu-miR-677-3p	chr10	128085335	128085360	+	26	0	0
mmu-miR-6914-5p	chr10	128382843	128382866	+	24	0	0
mmu-miR-6914-3p	chr10	128382882	128382900	+	19	0	0
mmu-miR-6915-5p	chr10	128388837	128388860	+	24	0	0
mmu-miR-6915-3p	chr10	128388879	128388900	+	22	0	0
mmu-miR-8105	chr10	128458732	128458753	+	22	0	0
mmu-miR-6916-5p	chr10	128512005	128512025	-	21	0	0
mmu-miR-6916-3p	chr10	128511968	128511989	-	22	0	0
mmu-miR-6917-5p	chr10	128584472	128584492	-	21	0	0
mmu-miR-6917-3p	chr10	128584437	128584458	-	22	0	0
mmu-miR-3060-5p	chr11	4139377	4139396	+	20	0	0
mmu-miR-3060-3p	chr11	4139413	4139434	+	22	0	0
mmu-miR-6918-5p	chr11	4891350	4891372	+	23	0	0
mmu-miR-6918-3p	chr11	4891381	4891402	+	22	0	0
mmu-miR-7651-5p	chr11	6401630	6401651	+	22	0	0
mmu-miR-7651-3p	chr11	6401670	6401693	+	24	0	0
mmu-miR-1933-5p	chr11	21344640	21344663	-	24	0	0
mmu-miR-1933-3p	chr11	21344600	21344621	-	22	2.94352	4.98899
mmu-miR-6372	chr11	26202258	26202280	+	23	0	0
mmu-miR-216b-5p	chr11	28746204	28746225	+	22	0	0
mmu-miR-216b-3p	chr11	28746244	28746265	+	22	0	0
mmu-miR-216c-5p	chr11	28746244	28746266	-	23	0	0
mmu-miR-216c-3p	chr11	28746198	28746220	-	23	0	0
mmu-miR-216a-5p	chr11	28757018	28757039	+	22	0	0
mmu-miR-216a-3p	chr11	28757058	28757079	+	22	0	0
mmu-miR-217-5p	chr11	28763761	28763783	+	23	0	0
mmu-miR-217-3p	chr11	28763798	28763820	+	23	0	0
mmu-miR-218-5p	chr11	35616840	35616860	+	21	5.67798	2.36186
mmu-miR-218-2-3p	chr11	35616882	35616903	+	22	0	3.38731
mmu-miR-103-1-5p	chr11	35782410	35782432	+	23	0	0
mmu-miR-103-3p	chr11	35782447	35782469	+	23	11.4014	11.6222
mmu-miR-146a-5p	chr11	43374435	43374456	-	22	4.00531	1.75099
mmu-miR-146a-3p	chr11	43374399	43374420	-	22	0	0
mmu-miR-8100	chr11	46102300	46102322	+	23	0	0
mmu-miR-7239-5p	chr11	46170087	46170106	+	20	0	0
mmu-miR-7239-3p	chr11	46170124	46170143	+	20	0	0
mmu-miR-340-5p	chr11	50069720	50069741	+	22	9.14606	8.73162
mmu-miR-340-3p	chr11	50069762	50069783	+	22	4.39771	5.4458
mmu-miR-6919-5p	chr11	50232250	50232272	+	23	0	0
mmu-miR-6919-3p	chr11	50232286	50232306	+	21	0	0
mmu-miR-804	chr11	50357799	50357820	-	22	0	0
mmu-miR-3061-5p	chr11	52126759	52126780	+	22	3.84657	0
mmu-miR-3061-3p	chr11	52126804	52126825	+	22	0	5.89618
mmu-miR-6920-5p	chr11	53409202	53409223	+	22	0	0
mmu-miR-6920-3p	chr11	53409245	53409265	+	21	0	0
mmu-miR-7671-5p	chr11	53763632	53763654	-	23	0	0
mmu-miR-7671-3p	chr11	53763597	53763618	-	22	0	0
mmu-miR-7652-5p	chr11	55501226	55501247	+	22	0	0
mmu-miR-7652-3p	chr11	55501261	55501281	+	21	2.58968	0
mmu-miR-6921-5p	chr11	60200591	60200612	-	22	0	0
mmu-miR-6921-3p	chr11	60200538	60200558	-	21	0	0
mmu-miR-6922-5p	chr11	60202300	60202322	-	23	0	0
mmu-miR-6922-3p	chr11	60202262	60202284	-	23	0	0
mmu-miR-5100	chr11	60728698	60728718	+	21	5.81292	4.03372
mmu-miR-744-5p	chr11	65734799	65734820	-	22	10.8041	11.4587
mmu-miR-744-3p	chr11	65734742	65734763	-	22	2.58968	0
mmu-miR-6923-5p	chr11	67099804	67099827	+	24	0	0
mmu-miR-6923-3p	chr11	67099855	67099875	+	21	0	0
mmu-miR-6406	chr11	68220917	68220938	+	22	0	0
mmu-miR-3062-5p	chr11	68990638	68990659	-	22	0	3.54183
mmu-miR-3062-3p	chr11	68990597	68990615	-	19	0	0
mmu-miR-467f	chr11	69635419	69635439	-	21	0	0
mmu-miR-1934-5p	chr11	69663055	69663077	+	23	6.31545	5.7611
mmu-miR-1934-3p	chr11	69663092	69663113	+	22	2.11983	3.86829
mmu-miR-6924-5p	chr11	69882067	69882089	-	23	0	0
mmu-miR-6924-3p	chr11	69882032	69882052	-	21	0	0
mmu-miR-324-5p	chr11	70012060	70012082	+	23	4.79553	4.35887
mmu-miR-324-3p	chr11	70012095	70012114	+	20	7.24403	7.31755
mmu-miR-497b	chr11	70234763	70234786	-	24	0	0
mmu-miR-497a-5p	chr11	70234730	70234751	+	22	8.70609	8.30225
mmu-miR-497a-3p	chr11	70234770	70234790	+	21	0	0
mmu-miR-195a-5p	chr11	70235062	70235082	+	21	7.12802	6.63205
mmu-miR-195a-3p	chr11	70235100	70235121	+	22	5.03524	6.30515
mmu-miR-7115-5p	chr11	70438256	70438279	+	24	0	0
mmu-miR-7115-3p	chr11	70438297	70438318	+	22	0	0
mmu-miR-6925-5p	chr11	70705995	70706016	+	22	0	0
mmu-miR-6925-3p	chr11	70706035	70706052	+	18	0	0
mmu-miR-6338	chr11	72388765	72388785	+	21	0	0
mmu-miR-6926-5p	chr11	74868168	74868189	-	22	0	0
mmu-miR-6926-3p	chr11	74868127	74868147	-	21	0	0
mmu-miR-212-5p	chr11	75173403	75173425	+	23	2.11983	0
mmu-miR-212-3p	chr11	75173443	75173464	+	22	1.41858	4.58902
mmu-miR-132-5p	chr11	75173686	75173707	+	22	0	0.670366
mmu-miR-132-3p	chr11	75173723	75173744	+	22	1.41858	3.21423
mmu-miR-22-5p	chr11	75463734	75463755	+	22	4.1483	0.670366
mmu-miR-22-3p	chr11	75463772	75463793	+	22	14.3965	14.3943
mmu-miR-3971	chr11	75551480	75551501	+	22	0	0
mmu-miR-423-5p	chr11	77078122	77078144	-	23	12.8772	13.0599
mmu-miR-423-3p	chr11	77078086	77078108	-	23	12.8533	12.7201
mmu-miR-144-5p	chr11	78073010	78073032	+	23	0	0
mmu-miR-144-3p	chr11	78073047	78073066	+	20	0	0
mmu-miR-451a	chr11	78073186	78073207	+	22	0	0
mmu-miR-451b	chr11	78073219	78073239	-	21	0	0
mmu-miR-7653-5p	chr11	78178827	78178848	+	22	0	0
mmu-miR-7653-3p	chr11	78178866	78178887	+	22	0	0
mmu-miR-193a-5p	chr11	79711975	79711996	+	22	0	0
mmu-miR-193a-3p	chr11	79712009	79712030	+	22	5.3032	4.39987
mmu-miR-365-2-5p	chr11	79726428	79726450	+	23	0	3.38731
mmu-miR-365-3p	chr11	79726467	79726488	+	22	4.39771	4.47853
mmu-miR-7679-5p	chr11	82985046	82985065	-	20	0	0
mmu-miR-7679-3p	chr11	82985003	82985026	-	24	0	0
mmu-miR-5110	chr11	85760675	85760699	-	25	0	0
mmu-miR-21a-5p	chr11	86584120	86584141	-	22	12.139	12.7309
mmu-miR-21a-3p	chr11	86584082	86584103	-	22	6.71066	5.95238
mmu-miR-301a-5p	chr11	87113017	87113038	+	22	3.22745	4.90604
mmu-miR-301a-3p	chr11	87113054	87113076	+	23	11.4103	11.3901
mmu-miR-142b	chr11	87756906	87756925	-	20	0	0
mmu-miR-142a-5p	chr11	87756867	87756887	+	21	9.63319	10.3382
mmu-miR-142a-3p	chr11	87756903	87756925	+	23	7.03904	7.42076
mmu-miR-378b	chr11	88352839	88352858	+	20	5.76932	6.00648
mmu-miR-3063-5p	chr11	95963347	95963367	-	21	0	0
mmu-miR-3063-3p	chr11	95963304	95963325	-	22	5.24073	0
mmu-miR-196a-5p	chr11	96265187	96265208	+	22	8.83854	8.28594
mmu-miR-196a-1-3p	chr11	96265225	96265246	+	22	5.03524	5.88178
mmu-miR-10a-5p	chr11	96317186	96317208	+	23	6.12106	7.57192
mmu-miR-10a-3p	chr11	96317227	96317248	+	22	0	0
mmu-miR-152-5p	chr11	96850400	96850423	+	24	4.79553	0
mmu-miR-152-3p	chr11	96850439	96850459	+	21	3.22745	1.12628
mmu-miR-8103	chr11	97063829	97063849	+	21	4.00531	4.22838
mmu-miR-7235-5p	chr11	97146402	97146419	-	18	0	0
mmu-miR-7235-3p	chr11	97146364	97146386	-	23	0	3.6133
mmu-miR-6927-5p	chr11	97677060	97677081	+	22	0	0
mmu-miR-6927-3p	chr11	97677106	97677126	+	21	2.58968	1.75099
mmu-miR-8102	chr11	97744974	97744995	+	22	0	0
mmu-miR-5119	chr11	98262638	98262656	+	19	5.36308	6.90553
mmu-miR-7116-5p	chr11	100478455	100478475	-	21	0	0
mmu-miR-7116-3p	chr11	100478411	100478432	-	22	0	0
mmu-miR-6928-5p	chr11	101030345	101030367	+	23	0	0
mmu-miR-6928-3p	chr11	101030388	101030409	+	22	0	0
mmu-miR-6929-5p	chr11	101419228	101419248	-	21	0	0
mmu-miR-6929-3p	chr11	101419187	101419209	-	23	0	0
mmu-miR-8101	chr11	102230103	102230124	-	22	0	0
mmu-miR-6930-5p	chr11	102404960	102404982	-	23	0	0
mmu-miR-6930-3p	chr11	102404920	102404940	-	21	0	0
mmu-miR-6931-5p	chr11	102999896	102999916	-	21	0	0
mmu-miR-6931-3p	chr11	102999848	102999868	-	21	0	0
mmu-miR-3064-5p	chr11	106782736	106782757	-	22	0	0
mmu-miR-3064-3p	chr11	106782695	106782716	-	22	0	0
mmu-miR-6932-5p	chr11	107637727	107637748	+	22	2.11983	0
mmu-miR-6932-3p	chr11	107637759	107637779	+	21	0	0
mmu-miR-7223-5p	chr11	107996848	107996867	+	20	0	0
mmu-miR-7223-3p	chr11	107996900	107996916	+	17	0	0
mmu-miR-3968	chr11	115447969	115447989	-	21	0	0
mmu-miR-5621-5p	chr11	115795824	115795846	+	23	0	0
mmu-miR-5621-3p	chr11	115795866	115795886	+	21	0	0
mmu-miR-6516-5p	chr11	117077370	117077391	+	22	0	0
mmu-miR-6516-3p	chr11	117077412	117077433	+	22	0	0
mmu-miR-6933-5p	chr11	118002279	118002300	+	22	0	0
mmu-miR-6933-3p	chr11	118002324	118002343	+	20	0	0
mmu-miR-6934-5p	chr11	119154111	119154132	-	22	0	0
mmu-miR-6934-3p	chr11	119154076	119154097	-	22	0	0
mmu-miR-1932	chr11	119390524	119390545	+	22	0	0
mmu-miR-338-5p	chr11	120014816	120014837	-	22	0	1.12628
mmu-miR-338-3p	chr11	120014781	120014802	-	22	3.46458	0
mmu-miR-3065-5p	chr11	120014780	120014801	+	22	0	0
mmu-miR-3065-3p	chr11	120014819	120014841	+	23	0	0
mmu-miR-6935-5p	chr11	120347387	120347408	-	22	0	0
mmu-miR-6935-3p	chr11	120347350	120347369	-	20	0	0
mmu-miR-6936-5p	chr11	120624856	120624876	-	21	0	0
mmu-miR-6936-3p	chr11	120624827	120624847	-	21	2.58968	0
mmu-miR-7236-5p	chr11	121387181	121387204	-	24	0	0
mmu-miR-7236-3p	chr11	121387145	121387166	-	22	0	0
mmu-miR-7675-5p	chr12	11299887	11299908	+	22	0	0
mmu-miR-7675-3p	chr12	11299924	11299944	+	21	0	0
mmu-miR-6387	chr12	15801064	15801085	-	22	0	0
mmu-miR-3066-5p	chr12	17355404	17355425	+	22	3.84657	3.6133
mmu-miR-3066-3p	chr12	17355441	17355462	+	22	0	0
mmu-miR-6538	chr12	26414970	26414988	-	19	8.7516	6.82503
mmu-miR-6937-5p	chr12	28679325	28679348	+	24	2.58968	0.670366
mmu-miR-6937-3p	chr12	28679367	28679389	+	23	0	0
mmu-miR-680	chr12	35194849	35194869	-	21	0	0
mmu-miR-5099	chr12	36816250	36816269	+	20	11.356	7.89233
mmu-miR-1938	chr12	40222782	40222803	-	22	0	0
mmu-miR-5627-5p	chr12	44210313	44210334	+	22	0	0
mmu-miR-5627-3p	chr12	44210350	44210373	+	24	0	2.78968
mmu-miR-1892	chr12	54645943	54645964	-	22	0	0
mmu-miR-681	chr12	69763923	69763943	-	21	0	0
mmu-miR-5101	chr12	75909154	75909175	+	22	0	0
mmu-miR-5135	chr12	76533143	76533166	-	24	0	0
mmu-miR-1843a-5p	chr12	80391654	80391674	-	21	3.46458	4.72429
mmu-miR-1843a-3p	chr12	80391615	80391636	-	22	2.94352	0
mmu-miR-3067-5p	chr12	81166165	81166187	+	23	0	0
mmu-miR-3067-3p	chr12	81166201	81166223	+	23	2.94352	0.670366
mmu-miR-6938-5p	chr12	85245958	85245980	-	23	0	0
mmu-miR-6938-3p	chr12	85245923	85245944	-	22	0	0
mmu-miR-3068-5p	chr12	87437724	87437747	-	24	0	0.670366
mmu-miR-3068-3p	chr12	87437685	87437706	-	22	6.08595	6.77915
mmu-miR-8099	chr12	93927373	93927393	+	21	0	0
mmu-miR-1190	chr12	101021692	101021713	-	22	0	0
mmu-miR-1936	chr12	102684943	102684965	-	23	0	0
mmu-miR-3069-5p	chr12	105031117	105031140	-	24	0	0
mmu-miR-3069-3p	chr12	105031078	105031099	-	22	0	0
mmu-miR-342-5p	chr12	108658638	108658659	+	22	6.45955	6.3159
mmu-miR-342-3p	chr12	108658680	108658702	+	23	7.46506	8.36053
mmu-miR-345-5p	chr12	108836989	108837010	+	22	4.00531	0
mmu-miR-345-3p	chr12	108837027	108837048	+	22	4.95968	4.51631
mmu-miR-1906	chr12	109544588	109544609	+	22	0	0
mmu-miR-770-5p	chr12	109563710	109563731	+	22	3.66818	1.12628
mmu-miR-770-3p	chr12	109563744	109563765	+	22	5.3032	4.13433
mmu-miR-673-5p	chr12	109572004	109572025	+	22	10.086	9.91808
mmu-miR-673-3p	chr12	109572044	109572066	+	23	6.86359	7.9929
mmu-miR-493-5p	chr12	109580243	109580261	+	19	4.87994	6.43903
mmu-miR-493-3p	chr12	109580283	109580305	+	23	5.42057	4.98899
mmu-miR-337-5p	chr12	109585818	109585839	+	22	9.1963	9.20339
mmu-miR-337-3p	chr12	109585850	109585871	+	22	4.50791	4.0849
mmu-miR-3544-5p	chr12	109585851	109585873	-	23	0	0
mmu-miR-3544-3p	chr12	109585813	109585834	-	22	0	0
mmu-miR-540-5p	chr12	109586085	109586107	+	23	5.63004	4.22838
mmu-miR-540-3p	chr12	109586122	109586141	+	20	11.5799	11.2619
mmu-miR-665-5p	chr12	109586331	109586356	+	26	0	0
mmu-miR-665-3p	chr12	109586368	109586387	+	20	8.79028	8.54089
mmu-miR-3070-5p	chr12	109587959	109587981	+	23	0	0
mmu-miR-3070-3p	chr12	109587999	109588020	+	22	0	0
mmu-miR-3070-2-3p	chr12	109588648	109588669	+	22	0	0
mmu-miR-431-5p	chr12	109590459	109590479	+	21	11.6575	11.1026
mmu-miR-431-3p	chr12	109590502	109590523	+	22	8.44721	8.2387
mmu-miR-433-5p	chr12	109591729	109591750	+	22	6.68743	6.13346
mmu-miR-433-3p	chr12	109591781	109591802	+	22	9.97288	9.75976
mmu-miR-127-5p	chr12	109592854	109592875	+	22	7.63256	8.67429
mmu-miR-127-3p	chr12	109592888	109592909	+	22	15.1213	15.0932
mmu-miR-434-5p	chr12	109594528	109594549	+	22	10.617	10.9765
mmu-miR-434-3p	chr12	109594565	109594586	+	22	13.6998	13.968
mmu-miR-432	chr12	109595006	109595028	+	23	0	0
mmu-miR-3071-5p	chr12	109595363	109595384	-	22	0	0
mmu-miR-3071-3p	chr12	109595329	109595350	-	22	0	0
mmu-miR-136-5p	chr12	109595331	109595352	+	22	9.40653	9.02652
mmu-miR-136-3p	chr12	109595366	109595387	+	22	11.3422	11.1386
mmu-miR-341-5p	chr12	109611521	109611541	+	21	3.22745	5.2354
mmu-miR-341-3p	chr12	109611556	109611576	+	21	11.2619	11.484
mmu-miR-1188-5p	chr12	109611841	109611861	+	21	0	0
mmu-miR-1188-3p	chr12	109611877	109611901	+	25	0	0
mmu-miR-370-5p	chr12	109618270	109618289	+	20	6.12106	5.2354
mmu-miR-370-3p	chr12	109618305	109618326	+	22	9.05368	9.76172
mmu-miR-882	chr12	109682207	109682228	+	22	0	0
mmu-miR-379-5p	chr12	109709065	109709085	+	21	6.01307	4.78745
mmu-miR-379-3p	chr12	109709102	109709123	+	22	7.5187	7.67573
mmu-miR-411-5p	chr12	109710190	109710210	+	21	13.1047	13.1581
mmu-miR-411-3p	chr12	109710225	109710246	+	22	8.80115	7.43563
mmu-miR-299a-5p	chr12	109710644	109710665	+	22	3.22745	1.98455
mmu-miR-299a-3p	chr12	109710676	109710697	+	22	7.24403	9.75186
mmu-miR-299b-5p	chr12	109710673	109710693	-	21	1.41858	0
mmu-miR-299b-3p	chr12	109710645	109710662	-	18	0	1.12628
mmu-miR-380-5p	chr12	109711806	109711827	+	22	4.87994	0
mmu-miR-380-3p	chr12	109711842	109711863	+	22	10.0659	9.09522
mmu-miR-1197-5p	chr12	109712361	109712381	+	21	0	0
mmu-miR-1197-3p	chr12	109712396	109712416	+	21	6.45955	4.47853
mmu-miR-323-5p	chr12	109712523	109712544	+	22	2.94352	0.670366
mmu-miR-323-3p	chr12	109712558	109712578	+	21	9.63926	10.3336
mmu-miR-758-5p	chr12	109712823	109712843	+	21	0	0
mmu-miR-758-3p	chr12	109712858	109712876	+	19	11.1495	10.9774
mmu-miR-329-5p	chr12	109713503	109713524	+	22	7.83642	7.32821
mmu-miR-329-3p	chr12	109713541	109713562	+	22	5.03524	0
mmu-miR-494-5p	chr12	109715334	109715355	+	22	5.3032	5.34443
mmu-miR-494-3p	chr12	109715367	109715388	+	22	8.88523	8.41154
mmu-miR-679-5p	chr12	109715587	109715608	+	22	8.12285	7.72899
mmu-miR-679-3p	chr12	109715624	109715645	+	22	0	2.51899
mmu-miR-1193-5p	chr12	109715716	109715735	+	20	4.1483	3.6133
mmu-miR-1193-3p	chr12	109715750	109715770	+	21	6.43186	3.54183
mmu-miR-666-5p	chr12	109717103	109717124	+	22	8.35437	8.79831
mmu-miR-666-3p	chr12	109717140	109717161	+	22	7.54479	8.70119
mmu-miR-543-5p	chr12	109717269	109717289	+	21	0	0
mmu-miR-543-3p	chr12	109717304	109717325	+	22	9.45205	10.3022
mmu-miR-495-5p	chr12	109718757	109718779	+	23	0	3.01751
mmu-miR-495-3p	chr12	109718795	109718816	+	22	6.66382	6.98851
mmu-miR-667-5p	chr12	109720020	109720044	+	25	4.50791	5.21257
mmu-miR-667-3p	chr12	109720061	109720083	+	23	8.08779	8.66801
mmu-miR-376c-5p	chr12	109722733	109722754	+	22	0	2.51899
mmu-miR-376c-3p	chr12	109722770	109722790	+	21	7.96757	7.51708
mmu-miR-654-5p	chr12	109723235	109723256	+	22	0	0
mmu-miR-654-3p	chr12	109723270	109723291	+	22	0	0
mmu-miR-376b-5p	chr12	109723471	109723492	+	22	4.79553	4.43973
mmu-miR-376b-3p	chr12	109723508	109723528	+	21	9.87345	8.80213
mmu-miR-376a-5p	chr12	109723786	109723807	+	22	7.24403	6.16947
mmu-miR-376a-3p	chr12	109723824	109723844	+	21	7.14517	7.29056
mmu-miR-300-5p	chr12	109724318	109724339	+	22	0	0
mmu-miR-300-3p	chr12	109724363	109724384	+	22	12.2156	12.1119
mmu-miR-381-5p	chr12	109726829	109726851	+	23	4.39771	0
mmu-miR-381-3p	chr12	109726870	109726891	+	22	12.0541	12.8232
mmu-miR-487b-5p	chr12	109727347	109727367	+	21	0	1.98455
mmu-miR-487b-3p	chr12	109727382	109727403	+	22	8.87499	9.42688
mmu-miR-539-5p	chr12	109728136	109728157	+	22	4.61029	5.04176
mmu-miR-539-3p	chr12	109728176	109728197	+	22	2.11983	3.6814
mmu-miR-544-5p	chr12	109729335	109729355	+	21	0	0
mmu-miR-544-3p	chr12	109729371	109729392	+	22	0	0
mmu-miR-382-5p	chr12	109733781	109733802	+	22	6.66382	4.13433
mmu-miR-382-3p	chr12	109733819	109733840	+	22	5.10704	1.12628
mmu-miR-134-5p	chr12	109734145	109734166	+	22	8.99339	9.55379
mmu-miR-134-3p	chr12	109734184	109734203	+	20	1.41858	3.6133
mmu-miR-668-5p	chr12	109734733	109734756	+	24	0	1.98455
mmu-miR-668-3p	chr12	109734774	109734797	+	24	7.11066	7.41577
mmu-miR-485-5p	chr12	109734910	109734931	+	22	7.07529	7.05419
mmu-miR-485-3p	chr12	109734946	109734967	+	22	8.89541	8.14233
mmu-miR-453	chr12	109735669	109735692	+	24	0	0
mmu-miR-154-5p	chr12	109738438	109738459	+	22	4.79553	5.30181
mmu-miR-154-3p	chr12	109738474	109738495	+	22	2.11983	1.98455
mmu-miR-496a-5p	chr12	109739132	109739152	+	21	0	0
mmu-miR-496a-3p	chr12	109739165	109739186	+	22	4.95968	4.35887
mmu-miR-377-5p	chr12	109740515	109740536	+	22	5.5291	5.6802
mmu-miR-377-3p	chr12	109740553	109740574	+	22	7.77161	6.77915
mmu-miR-541-5p	chr12	109742422	109742446	+	25	14.1354	14.3051
mmu-miR-541-3p	chr12	109742466	109742487	+	22	0	0
mmu-miR-409-5p	chr12	109743172	109743194	+	23	8.34698	8.0963
mmu-miR-409-3p	chr12	109743204	109743225	+	22	13.0236	13.9806
mmu-miR-412-5p	chr12	109743303	109743325	+	23	4.39771	4.93422
mmu-miR-412-3p	chr12	109743340	109743359	+	20	3.66818	3.6133
mmu-miR-369-5p	chr12	109743431	109743452	+	22	8.15708	8.38881
mmu-miR-369-3p	chr12	109743466	109743486	+	21	10.0816	9.38155
mmu-miR-410-5p	chr12	109743729	109743749	+	21	3.22745	0.670366
mmu-miR-410-3p	chr12	109743764	109743784	+	21	12.6595	13.1096
mmu-miR-3072-5p	chr12	109747893	109747914	+	22	0	1.75099
mmu-miR-3072-3p	chr12	109747928	109747949	+	22	0	0
mmu-miR-1247-5p	chr12	110278094	110278115	-	22	6.01307	5.09266
mmu-miR-1247-3p	chr12	110278058	110278078	-	21	3.46458	3.6133
mmu-miR-3073a-5p	chr12	112109252	112109273	+	22	1.41858	0
mmu-miR-3073a-3p	chr12	112109290	112109311	+	22	0	3.74642
mmu-miR-3073b-5p	chr12	112109288	112109309	-	22	0	0
mmu-miR-3073b-3p	chr12	112109250	112109271	-	22	0	0
mmu-miR-203-5p	chr12	112130889	112130910	+	22	0	0
mmu-miR-203-3p	chr12	112130927	112130948	+	22	6.22152	7.35452
mmu-miR-6939-5p	chr12	112659327	112659347	-	21	0	0
mmu-miR-6939-3p	chr12	112659277	112659296	-	20	0	0
mmu-miR-6940-5p	chr12	112733328	112733350	+	23	0	0
mmu-miR-6940-3p	chr12	112733369	112733391	+	23	0	0
mmu-miR-6941-5p	chr12	112920515	112920535	-	21	0	0
mmu-miR-6941-3p	chr12	112920483	112920503	-	21	0	0
mmu-miR-7094-1-5p	chr12	114469444	114469466	-	23	0	0
mmu-miR-7094-3p	chr12	114469408	114469428	-	21	0	0
mmu-miR-7094b-2-5p	chr12	114513672	114513694	-	23	0	0
mmu-miR-6388	chr12	115695773	115695793	-	21	0	0
mmu-miR-153-5p	chr12	117250827	117250843	+	17	0	0
mmu-miR-153-3p	chr12	117250860	117250881	+	22	0	3.38731
mmu-miR-466i-5p	chr13	17747525	17747544	+	20	0	0
mmu-miR-466i-3p	chr13	17747552	17747573	+	22	0	0
mmu-miR-6942-5p	chr13	21396613	21396633	-	21	0	0
mmu-miR-6942-3p	chr13	21396579	21396600	-	22	0	0
mmu-miR-1896	chr13	21445209	21445230	+	22	0	0
mmu-miR-1983	chr13	21896930	21896950	-	21	9.13751	9.39555
mmu-miR-6368	chr13	28710796	28710816	-	21	0	0
mmu-miR-5124a	chr13	40865801	40865820	+	20	0	0
mmu-let-7d-5p	chr13	48536078	48536099	-	22	6.45955	5.69674
mmu-let-7d-3p	chr13	48536024	48536045	-	22	4.00531	4.62405
mmu-let-7f-5p	chr13	48537889	48537910	-	22	9.35953	8.87301
mmu-let-7f-1-3p	chr13	48537833	48537854	-	22	0	0
mmu-let-7a-5p	chr13	48538239	48538260	-	22	7.36611	8.17221
mmu-let-7a-1-3p	chr13	48538188	48538209	-	22	0	0
mmu-miR-683	chr13	50544644	50544664	-	21	0	0
mmu-miR-6943-5p	chr13	55453111	55453130	+	20	0	0
mmu-miR-6943-3p	chr13	55453150	55453171	+	22	0	0
mmu-miR-6944-5p	chr13	55477754	55477776	-	23	0	0
mmu-miR-6944-3p	chr13	55477681	55477703	-	23	7.29103	7.45521
mmu-miR-6945-5p	chr13	55507667	55507688	-	22	0	0
mmu-miR-6945-3p	chr13	55507627	55507647	-	21	0	0
mmu-miR-874-5p	chr13	58023170	58023191	-	22	0	0
mmu-miR-874-3p	chr13	58023135	58023156	-	22	4.87994	2.1855
mmu-miR-6369	chr13	58313119	58313141	-	23	0	0
mmu-miR-7a-5p	chr13	58392841	58392863	-	23	4.1483	2.78968
mmu-miR-7a-1-3p	chr13	58392800	58392821	-	22	2.94352	0
mmu-miR-713	chr13	62760807	62760825	+	19	0	0
mmu-miR-23b-5p	chr13	63300492	63300512	+	21	0	0
mmu-miR-23b-3p	chr13	63300529	63300549	+	21	8.24723	9.2005
mmu-miR-27b-5p	chr13	63300718	63300739	+	22	5.9752	7.13533
mmu-miR-27b-3p	chr13	63300760	63300780	+	21	13.6229	13.8901
mmu-miR-3074-5p	chr13	63301249	63301270	-	22	0	0
mmu-miR-3074-1-3p	chr13	63301211	63301232	-	22	3.46458	1.12628
mmu-miR-24-1-5p	chr13	63301213	63301235	+	23	0	0
mmu-miR-24-3p	chr13	63301251	63301272	+	22	7.00186	6.45856
mmu-miR-466f	chr13	71107108	71107129	+	22	4.39771	3.80864
mmu-miR-692	chr13	74407121	74407141	+	21	0	0
mmu-miR-682	chr13	75645119	75645139	+	21	4.95968	0
mmu-miR-3961	chr13	82698278	82698296	-	19	0	0
mmu-miR-9-5p	chr13	83738821	83738843	+	23	7.5956	7.45034
mmu-miR-9-3p	chr13	83738858	83738879	+	22	0	0
mmu-miR-5624-5p	chr13	93790777	93790794	+	18	0	0
mmu-miR-5624-3p	chr13	93790816	93790837	+	22	0	0
mmu-miR-582-5p	chr13	109324753	109324774	+	22	6.22152	4.47853
mmu-miR-582-3p	chr13	109324790	109324810	+	21	9.15031	8.58822
mmu-miR-1904	chr13	109903819	109903840	+	22	0	0
mmu-miR-449c-5p	chr13	113036008	113036028	+	21	4.00531	4.31667
mmu-miR-449c-3p	chr13	113036049	113036070	+	22	0	0
mmu-miR-449b	chr13	113037429	113037448	+	20	0	0
mmu-miR-449a-5p	chr13	113037549	113037570	+	22	4.61029	0
mmu-miR-449a-3p	chr13	113037589	113037610	+	22	0	0
mmu-miR-5124b	chr14	11282482	11282502	+	21	0	0
mmu-miR-6946-5p	chr14	20690640	20690660	+	21	0	0
mmu-miR-6946-3p	chr14	20690684	20690703	+	20	0	0
mmu-miR-7210-5p	chr14	24088877	24088899	+	23	0	0
mmu-miR-7210-3p	chr14	24088907	24088930	+	24	0	0
mmu-miR-3075-5p	chr14	25534451	25534471	+	21	0	0
mmu-miR-3075-3p	chr14	25534491	25534511	+	21	0	0
mmu-miR-7672-5p	chr14	26669587	26669608	-	22	0	0
mmu-miR-7672-3p	chr14	26669547	26669567	-	21	0	0
mmu-miR-6947-5p	chr14	29988893	29988913	+	21	0	0
mmu-miR-6947-3p	chr14	29988930	29988951	+	22	0	0
mmu-miR-3076-5p	chr14	30572150	30572173	+	24	0	0
mmu-miR-3076-3p	chr14	30572185	30572207	+	23	0	0
mmu-miR-346-5p	chr14	34894624	34894646	+	23	0	0
mmu-miR-346-3p	chr14	34894662	34894683	+	22	0	0
mmu-miR-327	chr14	44947483	44947501	-	19	0	0
mmu-miR-5131	chr14	45657972	45657994	-	23	0	0
mmu-miR-378c	chr14	46954905	46954925	-	21	6.68743	6.59722
mmu-miR-686	chr14	54616746	54616767	-	22	1.41858	0
mmu-miR-6948-5p	chr14	54643084	54643105	-	22	0	0
mmu-miR-6948-3p	chr14	54643050	54643070	-	21	1.41858	1.12628
mmu-miR-208a-5p	chr14	54949107	54949128	-	22	0	0
mmu-miR-208a-3p	chr14	54949072	54949093	-	22	0	0
mmu-miR-208b-5p	chr14	54975745	54975766	-	22	0	0
mmu-miR-208b-3p	chr14	54975710	54975731	-	22	0	1.47219
mmu-miR-6949-5p	chr14	56082441	56082463	-	23	0	0
mmu-miR-6949-3p	chr14	56082401	56082421	-	21	0	0
mmu-miR-3077-5p	chr14	57798424	57798448	+	25	0	0
mmu-miR-3077-3p	chr14	57798466	57798487	+	22	1.41858	0
mmu-miR-719	chr14	60228873	60228894	-	22	4.00531	0
mmu-miR-16-5p	chr14	61631936	61631957	-	22	13.4589	12.1965
mmu-miR-16-1-3p	chr14	61631894	61631915	-	22	3.46458	4.39987
mmu-miR-15a-5p	chr14	61632075	61632096	-	22	9.06725	8.5317
mmu-miR-15a-3p	chr14	61632038	61632059	-	22	4.00531	3.80864
mmu-miR-8098	chr14	62837797	62837817	+	21	1.41858	0
mmu-miR-6541	chr14	62865610	62865630	+	21	0	0
mmu-miR-598-5p	chr14	63727199	63727221	+	23	0	0
mmu-miR-598-3p	chr14	63727236	63727257	+	22	3.66818	4.75622
mmu-miR-124-5p	chr14	64590670	64590691	+	22	5.03524	4.65824
mmu-miR-124-3p	chr14	64590709	64590728	+	20	7.24403	6.2724
mmu-miR-3078-5p	chr14	64591200	64591222	+	23	5.47585	5.46525
mmu-miR-3078-3p	chr14	64591239	64591258	+	20	0	3.98066
mmu-miR-6539	chr14	67859699	67859722	-	24	6.53958	0
mmu-miR-6950-5p	chr14	69692253	69692275	+	23	0	0
mmu-miR-6950-3p	chr14	69692293	69692313	+	21	0	0
mmu-miR-320-5p	chr14	70443525	70443546	+	22	0	0
mmu-miR-320-3p	chr14	70443557	70443578	+	22	9.72162	10.3566
mmu-miR-687	chr14	73206808	73206829	-	22	0	0
mmu-miR-1971	chr14	78191451	78191468	-	18	0	0
mmu-miR-759	chr14	79738460	79738481	+	22	0	0
mmu-miR-5130	chr14	102982608	102982631	-	24	0	0
mmu-miR-6390	chr14	105623710	105623730	-	21	0	0
mmu-miR-17-5p	chr14	115043684	115043706	+	23	10.8778	10.5189
mmu-miR-17-3p	chr14	115043721	115043742	+	22	8.3018	8.18986
mmu-miR-18a-5p	chr14	115043867	115043889	+	23	8.95012	8.84173
mmu-miR-18a-3p	chr14	115043908	115043929	+	22	7.17888	5.8377
mmu-miR-19a-5p	chr14	115044012	115044033	+	22	4.00531	5.46525
mmu-miR-19a-3p	chr14	115044048	115044070	+	23	9.57107	8.7456
mmu-miR-20a-5p	chr14	115044183	115044205	+	23	9.98722	10.0062
mmu-miR-20a-3p	chr14	115044219	115044240	+	22	5.10704	5.42609
mmu-miR-19b-3p	chr14	115044358	115044380	+	23	11.3652	10.5686
mmu-miR-19b-1-5p	chr14	115044320	115044342	+	23	2.94352	0
mmu-miR-92a-3p	chr14	115044476	115044496	+	21	16.9973	17.0404
mmu-miR-92a-1-5p	chr14	115044437	115044459	+	23	9.78044	10.6527
mmu-miR-6239	chr14	117953768	117953787	-	20	0	0.670366
mmu-miR-6241	chr14	118258659	118258677	+	19	0	0
mmu-miR-6391	chr14	118592376	118592396	-	21	0	0
mmu-miR-1898	chr15	12171502	12171523	+	22	0	0
mmu-miR-7212-5p	chr15	25948227	25948247	+	21	0	0
mmu-miR-7212-3p	chr15	25948267	25948287	+	21	0	0
mmu-miR-7117-5p	chr15	27571499	27571520	+	22	0	0
mmu-miR-7117-3p	chr15	27571539	27571558	+	20	0	0
mmu-miR-3964	chr15	29713337	29713356	-	20	0	0
mmu-miR-599	chr15	35660846	35660864	-	19	0	0
mmu-miR-875-5p	chr15	35661016	35661037	-	22	0	0
mmu-miR-875-3p	chr15	35660982	35661002	-	21	0	0
mmu-miR-8097	chr15	36240113	36240134	-	22	0	0
mmu-miR-6951-5p	chr15	38490522	38490542	-	21	0	0
mmu-miR-6951-3p	chr15	38490473	38490493	-	21	0	0
mmu-miR-1907	chr15	50889035	50889056	-	22	0	0
mmu-miR-28c	chr15	53614216	53614235	-	20	3.22745	3.11922
mmu-miR-30b-5p	chr15	68337469	68337490	-	22	9.29567	7.84115
mmu-miR-30b-3p	chr15	68337431	68337452	-	22	0	0
mmu-miR-30d-5p	chr15	68341257	68341278	-	22	12.464	12.8404
mmu-miR-30d-3p	chr15	68341217	68341238	-	22	6.28481	7.59417
mmu-miR-151-5p	chr15	73254855	73254875	-	21	11.2119	11.7117
mmu-miR-151-3p	chr15	73254820	73254840	-	21	11.9873	12.3161
mmu-miR-6952-5p	chr15	76064862	76064883	-	22	0	0
mmu-miR-6952-3p	chr15	76064828	76064849	-	22	3.66818	5.11745
mmu-miR-1942	chr15	76215621	76215641	-	21	0	0
mmu-miR-6953-5p	chr15	76248196	76248221	+	26	0	0
mmu-miR-6953-3p	chr15	76248235	76248258	+	24	0	0
mmu-miR-3079-5p	chr15	76290932	76290954	-	23	0	0
mmu-miR-3079-3p	chr15	76290891	76290911	-	21	0	0
mmu-miR-6954-5p	chr15	76433219	76433240	+	22	0	0
mmu-miR-6954-3p	chr15	76433253	76433273	+	21	0	0
mmu-miR-7676-5p	chr15	78284827	78284849	-	23	0	0
mmu-miR-7676-3p	chr15	78284788	78284809	-	22	0	0
mmu-miR-6955-5p	chr15	78891845	78891868	+	24	0	0
mmu-miR-6955-3p	chr15	78891891	78891912	+	22	0	0
mmu-miR-6956-5p	chr15	79002231	79002250	+	20	0	0
mmu-miR-6956-3p	chr15	79002265	79002284	+	20	0	3.21423
mmu-miR-1943-5p	chr15	79375271	79375293	-	23	4.50791	6.03278
mmu-miR-1943-3p	chr15	79375236	79375256	-	21	0	0
mmu-miR-7213-5p	chr15	79999007	79999026	-	20	0	0
mmu-miR-7213-3p	chr15	79998970	79998989	-	20	0	0
mmu-miR-6957-5p	chr15	80646078	80646098	+	21	0	0
mmu-miR-6957-3p	chr15	80646113	80646134	+	22	0	0
mmu-miR-5113	chr15	80940049	80940071	+	23	3.46458	4.93422
mmu-miR-33-5p	chr15	82198127	82198147	+	21	5.58045	6.09652
mmu-miR-33-3p	chr15	82198167	82198188	+	22	1.41858	1.75099
mmu-miR-7684-5p	chr15	82393958	82393978	-	21	0	0
mmu-miR-7684-3p	chr15	82393919	82393940	-	22	0	0
mmu-miR-3080-5p	chr15	82959266	82959285	-	20	0	0
mmu-miR-3080-3p	chr15	82959228	82959249	-	22	0	0
mmu-miR-6392-5p	chr15	84168285	84168307	+	23	0	0
mmu-miR-6392-3p	chr15	84168334	84168356	+	23	0	0
mmu-miR-1249-5p	chr15	84951579	84951603	-	25	0	0
mmu-miR-1249-3p	chr15	84951545	84951566	-	22	0	0
mmu-let-7c-5p	chr15	85706616	85706637	+	22	7.02057	8.23304
mmu-let-7c-2-3p	chr15	85706664	85706685	+	22	0	0
mmu-let-7b-5p	chr15	85707325	85707346	+	22	0	5.6802
mmu-let-7b-3p	chr15	85707379	85707400	+	22	0	0
mmu-miR-6393	chr15	87795919	87795940	-	22	0	0
mmu-miR-7118-5p	chr15	89162882	89162903	-	22	0	0
mmu-miR-7118-3p	chr15	89162849	89162870	-	22	0	3.80864
mmu-miR-6958-5p	chr15	89185516	89185537	-	22	1.41858	0
mmu-miR-6958-3p	chr15	89185465	89185487	-	23	3.46458	2.1855
mmu-miR-6959-5p	chr15	89305705	89305727	-	23	0	0
mmu-miR-6959-3p	chr15	89305658	89305679	-	22	0	0
mmu-miR-7648-5p	chr15	90224360	90224379	+	20	0	0
mmu-miR-7648-3p	chr15	90224392	90224412	+	21	0	4.39987
mmu-miR-1291	chr15	98519828	98519853	-	26	0	0
mmu-miR-6960-5p	chr15	99080810	99080831	+	22	4.70588	2.1855
mmu-miR-6960-3p	chr15	99080844	99080865	+	22	0	0
mmu-miR-6961-5p	chr15	100649205	100649224	-	20	0	0
mmu-miR-6961-3p	chr15	100649163	100649184	-	22	0	0
mmu-miR-6962-5p	chr15	101193874	101193893	+	20	0	0
mmu-miR-6962-3p	chr15	101193908	101193929	+	22	0	0
mmu-miR-1941-5p	chr15	101369364	101369387	+	24	0	3.11922
mmu-miR-1941-3p	chr15	101369401	101369421	+	21	0	0
mmu-miR-688	chr15	102671802	102671821	-	20	0	0
mmu-miR-196a-2-3p	chr15	102973401	102973422	+	22	0	0
mmu-miR-615-5p	chr15	103014926	103014947	+	22	0	0
mmu-miR-615-3p	chr15	103014969	103014990	+	22	0	4.78745
mmu-miR-148b-5p	chr15	103285148	103285171	+	24	8.05185	6.81748
mmu-miR-148b-3p	chr15	103285185	103285206	+	22	10.1405	9.69431
mmu-miR-6963-5p	chr15	103350497	103350520	-	24	0	0
mmu-miR-6963-3p	chr15	103350455	103350477	-	23	0	0
mmu-miR-6364	chr16	5215790	5215811	-	22	0	0
mmu-miR-1945	chr16	11254381	11254402	-	22	2.94352	4.0849
mmu-miR-193b-5p	chr16	13449533	13449554	+	22	2.58968	0.670366
mmu-miR-193b-3p	chr16	13449570	13449591	+	22	5.72437	4.47853
mmu-miR-365-1-5p	chr16	13453855	13453877	+	23	0	0
mmu-miR-6365	chr16	13471103	13471124	-	22	0	0
mmu-miR-484	chr16	14159630	14159651	+	22	10.6801	10.3203
mmu-miR-130b-5p	chr16	17124109	17124130	-	22	9.93639	10.7406
mmu-miR-130b-3p	chr16	17124071	17124092	-	22	11.2159	11.3879
mmu-miR-301b-5p	chr16	17124456	17124477	-	22	4.27839	5.64652
mmu-miR-301b-3p	chr16	17124420	17124442	-	23	9.14606	9.01667
mmu-miR-6366	chr16	18165093	18165114	-	22	0	0
mmu-miR-1306-3p	chr16	18284248	18284268	-	21	2.11983	2.78968
mmu-miR-1306-5p	chr16	18284288	18284310	-	23	4.70588	2.1855
mmu-miR-3618-5p	chr16	18284602	18284623	-	22	0	0
mmu-miR-3618-3p	chr16	18284562	18284583	-	22	0	0
mmu-miR-185-5p	chr16	18327438	18327459	-	22	0	0
mmu-miR-185-3p	chr16	18327405	18327425	-	21	2.11983	4.13433
mmu-miR-1224-5p	chr16	20604452	20604472	+	21	0	0
mmu-miR-1224-3p	chr16	20604516	20604536	+	21	0	0
mmu-miR-7680-5p	chr16	21256047	21256066	-	20	0	0
mmu-miR-7680-3p	chr16	21256013	21256034	-	22	0	0
mmu-miR-8095	chr16	22532128	22532149	-	22	0	0
mmu-miR-6362	chr16	22605342	22605363	+	22	0	0
mmu-miR-28a-5p	chr16	24827868	24827889	+	22	9.75273	8.80595
mmu-miR-28a-3p	chr16	24827908	24827929	+	22	6.28481	7.91726
mmu-miR-690	chr16	28599940	28599961	-	22	0	0
mmu-miR-1946a	chr16	32267540	32267566	-	27	0	0
mmu-miR-1947-5p	chr16	33105375	33105396	+	22	5.63004	5.36529
mmu-miR-1947-3p	chr16	33105411	33105432	+	22	0	0
mmu-miR-6540-5p	chr16	42303425	42303446	-	22	2.11983	0
mmu-miR-6540-3p	chr16	42303386	42303406	-	21	2.94352	0
mmu-miR-568	chr16	43640665	43640684	+	20	0	0
mmu-miR-3470b	chr16	44013885	44013905	+	21	0	0
mmu-miR-3081-5p	chr16	44558092	44558114	-	23	0	0
mmu-miR-3081-3p	chr16	44558058	44558080	-	23	0	0
mmu-miR-6363	chr16	50727204	50727225	+	22	0	0
mmu-miR-5118	chr16	55494770	55494788	+	19	0	0
mmu-miR-691	chr16	74342005	74342026	-	22	0	0
mmu-miR-99a-5p	chr16	77598940	77598961	+	22	0	0
mmu-miR-99a-3p	chr16	77598977	77598997	+	21	0	0
mmu-let-7c-1-3p	chr16	77599717	77599738	+	22	0	0
mmu-miR-125b-5p	chr16	77646279	77646300	+	22	4.39771	5.25788
mmu-miR-125b-2-3p	chr16	77646318	77646339	+	22	0	0
mmu-miR-155-5p	chr16	84714143	84714165	+	23	6.31545	6.35812
mmu-miR-155-3p	chr16	84714182	84714202	+	21	3.66818	0
mmu-miR-6367	chr16	91527468	91527489	-	22	0	0
mmu-miR-802-5p	chr16	93369737	93369758	+	22	0	0
mmu-miR-802-3p	chr16	93369775	93369796	+	22	0	0
mmu-miR-6964-5p	chr16	97877266	97877286	-	21	0	0
mmu-miR-6964-3p	chr16	97877233	97877252	-	20	0	0
mmu-miR-99b-5p	chr17	17830194	17830215	+	22	11.979	11.8506
mmu-miR-99b-3p	chr17	17830232	17830253	+	22	7.38067	7.44545
mmu-let-7e-5p	chr17	17830366	17830387	+	22	7.91853	7.64195
mmu-let-7e-3p	chr17	17830411	17830432	+	22	0	0
mmu-miR-125a-5p	chr17	17830817	17830840	+	24	11.4436	10.9892
mmu-miR-125a-3p	chr17	17830855	17830876	+	22	2.94352	1.47219
mmu-miR-5125	chr17	23823339	23823358	+	20	0	0
mmu-miR-5134-5p	chr17	24234575	24234595	-	21	0	0
mmu-miR-5134-3p	chr17	24234535	24234556	-	22	0	0
mmu-miR-6965-5p	chr17	24240919	24240942	-	24	0	0
mmu-miR-6965-3p	chr17	24240884	24240905	-	22	0	0
mmu-miR-3547-5p	chr17	25245614	25245638	-	25	0	0
mmu-miR-3547-3p	chr17	25245551	25245571	-	21	0	0
mmu-miR-6966-5p	chr17	25780813	25780833	+	21	0	0
mmu-miR-6966-3p	chr17	25780859	25780879	+	21	0	0
mmu-miR-3082-5p	chr17	25831406	25831427	-	22	0	0
mmu-miR-3082-3p	chr17	25831366	25831387	-	22	2.94352	3.21423
mmu-miR-6967-5p	chr17	26920967	26920987	+	21	0	0
mmu-miR-6967-3p	chr17	26921000	26921019	+	20	0	0
mmu-miR-6968-5p	chr17	26935472	26935493	+	22	0	0
mmu-miR-6968-3p	chr17	26935518	26935539	+	22	0	3.46664
mmu-miR-3083-5p	chr17	26948093	26948114	-	22	0	3.86829
mmu-miR-3083-3p	chr17	26948058	26948079	-	22	0	0
mmu-miR-7677-5p	chr17	27091245	27091269	+	25	0	0
mmu-miR-7677-3p	chr17	27091289	27091311	+	23	0	0
mmu-miR-7214-5p	chr17	27317073	27317095	-	23	0	0
mmu-miR-7214-3p	chr17	27317035	27317058	-	24	0	0
mmu-miR-7216-5p	chr17	27328385	27328408	+	24	0	0
mmu-miR-7216-3p	chr17	27328440	27328460	+	21	0	0
mmu-miR-7217-5p	chr17	27355738	27355762	+	25	0	0
mmu-miR-7217-3p	chr17	27355778	27355799	+	22	0	0
mmu-miR-7218-5p	chr17	27358097	27358117	+	21	0	0
mmu-miR-7218-3p	chr17	27358132	27358155	+	24	0	0
mmu-miR-6969-5p	chr17	28558475	28558496	-	22	0	0
mmu-miR-6969-3p	chr17	28558441	28558460	-	20	0	0
mmu-miR-7667-5p	chr17	29595538	29595559	+	22	0	0
mmu-miR-7667-3p	chr17	29595579	29595600	+	22	3.46458	0
mmu-miR-219a-5p	chr17	34025052	34025072	-	21	0	1.12628
mmu-miR-219a-1-3p	chr17	34025010	34025031	-	22	4.00531	4.39987
mmu-miR-219c-5p	chr17	34025012	34025033	+	22	1.41858	0
mmu-miR-219c-3p	chr17	34025050	34025071	+	22	0	0
mmu-miR-6971-5p	chr17	34841847	34841866	-	20	0	0
mmu-miR-6971-3p	chr17	34841809	34841829	-	21	0	0
mmu-miR-6970-5p	chr17	34845143	34845167	-	25	0	3.80864
mmu-miR-6970-3p	chr17	34845104	34845124	-	21	0	0
mmu-miR-6972-5p	chr17	34857605	34857627	-	23	0	0
mmu-miR-6972-3p	chr17	34857569	34857589	-	21	0	0
mmu-miR-6973a-5p	chr17	35194977	35194998	+	22	0	0
mmu-miR-6973a-3p	chr17	35195024	35195045	+	22	0	0
mmu-miR-6974-5p	chr17	35204534	35204557	-	24	0	0
mmu-miR-6974-3p	chr17	35204475	35204496	-	22	0	0
mmu-miR-6975-5p	chr17	35244080	35244102	+	23	0	0
mmu-miR-6975-3p	chr17	35244116	35244135	+	20	0	0
mmu-miR-8094	chr17	35251314	35251334	+	21	5.03524	2.66067
mmu-miR-1894-5p	chr17	35917899	35917920	+	22	0	0
mmu-miR-1894-3p	chr17	35917938	35917959	+	22	0	0
mmu-miR-877-5p	chr17	35960795	35960814	-	20	9.87345	11.816
mmu-miR-877-3p	chr17	35960731	35960752	-	22	4.79553	3.11922
mmu-miR-693-5p	chr17	46231551	46231571	+	21	0	0
mmu-miR-693-3p	chr17	46231581	46231603	+	23	1.41858	0
mmu-miR-6976-5p	chr17	46553862	46553884	-	23	0	0
mmu-miR-6976-3p	chr17	46553827	46553847	-	21	0	0
mmu-miR-7b-5p	chr17	56243017	56243039	+	23	0	0
mmu-miR-7b-3p	chr17	56243055	56243076	+	22	0	0
mmu-miR-6977-5p	chr17	56418885	56418909	-	25	0	0
mmu-miR-6977-3p	chr17	56418850	56418871	-	22	0	0
mmu-miR-6978-5p	chr17	57217201	57217223	-	23	0	0
mmu-miR-6978-3p	chr17	57217172	57217194	-	23	0	0
mmu-miR-6420	chr17	64440863	64440883	+	21	0	0
mmu-miR-5709-5p	chr17	67026197	67026218	-	22	0	0
mmu-miR-5709-3p	chr17	67026162	67026183	-	22	0	0
mmu-miR-1195	chr17	70860558	70860580	-	23	0	0
mmu-miR-1893	chr18	6490574	6490595	-	22	0	0
mmu-miR-133a-5p	chr18	10782950	10782970	-	21	0	0
mmu-miR-133a-3p	chr18	10782913	10782934	-	22	3.22745	1.12628
mmu-miR-1b-5p	chr18	10785486	10785506	+	21	0	0
mmu-miR-1b-3p	chr18	10785525	10785547	+	23	0	0
mmu-miR-1a-2-5p	chr18	10785523	10785545	-	23	0	0
mmu-miR-1a-3p	chr18	10785485	10785506	-	22	0	0
mmu-miR-1901	chr18	11840371	11840392	-	22	0	0
mmu-miR-1948-5p	chr18	12714825	12714845	+	21	0	0
mmu-miR-1948-3p	chr18	12714862	12714883	+	22	0	0
mmu-miR-6360	chr18	23774938	23774959	-	22	0	0
mmu-miR-187-5p	chr18	24429147	24429168	-	22	0	4.81803
mmu-miR-187-3p	chr18	24429110	24429131	-	22	4.61029	6.45856
mmu-miR-6361	chr18	32880574	32880596	-	23	0	0
mmu-miR-1949	chr18	35554612	35554635	+	24	0	0
mmu-miR-6979-5p	chr18	37854641	37854660	-	20	0	0
mmu-miR-6979-3p	chr18	37854605	37854625	-	21	2.58968	0
mmu-miR-6981-5p	chr18	37974592	37974617	-	26	0	0
mmu-miR-6981-3p	chr18	37974503	37974524	-	22	0	0
mmu-miR-6980-5p	chr18	37990919	37990940	-	22	0	0
mmu-miR-6980-3p	chr18	37990887	37990906	-	20	0	0
mmu-miR-1258-5p	chr18	56538139	56538160	+	22	3.22745	0
mmu-miR-1258-3p	chr18	56538177	56538198	+	22	0	0
mmu-miR-6355	chr18	59579646	59579666	+	21	0	0
mmu-miR-5107-5p	chr18	60812086	60812106	+	21	0	0
mmu-miR-5107-3p	chr18	60812130	60812151	+	22	0	0
mmu-miR-7220-5p	chr18	60953873	60953894	+	22	3.84657	0
mmu-miR-7220-3p	chr18	60953910	60953932	+	23	0	0
mmu-miR-6982-5p	chr18	60958078	60958102	+	25	0	0
mmu-miR-6982-3p	chr18	60958120	60958140	+	21	0	0
mmu-miR-6983-5p	chr18	61117473	61117494	+	22	0	0
mmu-miR-6983-3p	chr18	61117509	61117531	+	23	0	0
mmu-miR-378a-5p	chr18	61397875	61397896	-	22	0	0
mmu-miR-378a-3p	chr18	61397838	61397858	-	21	11.9303	12.0286
mmu-miR-145a-5p	chr18	61647866	61647888	-	23	3.46458	3.6133
mmu-miR-145a-3p	chr18	61647827	61647848	-	22	4.27839	4.03372
mmu-miR-143-5p	chr18	61649233	61649253	-	21	0	0
mmu-miR-143-3p	chr18	61649199	61649219	-	21	12.0744	12.0372
mmu-miR-122-5p	chr18	65248866	65248887	+	22	0	0
mmu-miR-122-3p	chr18	65248901	65248920	+	20	0	0
mmu-miR-694	chr18	66219276	66219294	-	19	0	0
mmu-miR-7219-5p	chr18	68260951	68260973	-	23	0	0
mmu-miR-7219-3p	chr18	68260920	68260940	-	21	0	0
mmu-miR-6356	chr18	68739401	68739421	+	21	0	0
mmu-miR-145b	chr18	69022237	69022257	-	21	0	0
mmu-miR-6357	chr18	70516862	70516884	+	23	0	0
mmu-miR-6358	chr18	76170554	76170576	+	23	0	0
mmu-miR-5127	chr18	81992020	81992038	-	19	0	0
mmu-miR-5112	chr18	82720291	82720309	+	19	0	0
mmu-miR-6359	chr18	88972087	88972107	+	21	0	0
mmu-miR-6984-5p	chr19	3288925	3288948	+	24	2.58968	0
mmu-miR-6984-3p	chr19	3288961	3288981	+	21	0	0
mmu-miR-6985-5p	chr19	4263852	4263873	-	22	0	0
mmu-miR-6985-3p	chr19	4263818	4263838	-	21	0	0
mmu-miR-6986-5p	chr19	4623929	4623950	-	22	0	0
mmu-miR-6986-3p	chr19	4623898	4623916	-	19	0	0
mmu-miR-6987-5p	chr19	5679050	5679071	-	22	0	0
mmu-miR-6987-3p	chr19	5679004	5679026	-	23	0	0
mmu-miR-6988-5p	chr19	6051338	6051358	+	21	0	0
mmu-miR-6988-3p	chr19	6051371	6051392	+	22	3.46458	2.66067
mmu-miR-194-2-3p	chr19	6264694	6264715	+	22	1.41858	0
mmu-miR-192-5p	chr19	6264857	6264877	+	21	10.4682	10.5754
mmu-miR-192-3p	chr19	6264900	6264921	+	22	0	0
mmu-miR-6989-5p	chr19	6346485	6346506	+	22	0	0
mmu-miR-6989-3p	chr19	6346523	6346544	+	22	0	1.12628
mmu-miR-5046	chr19	6829917	6829940	-	24	0	0
mmu-miR-6990-5p	chr19	6914261	6914281	-	21	1.41858	0
mmu-miR-6990-3p	chr19	6914196	6914216	-	21	0	0
mmu-miR-6991-5p	chr19	7422578	7422599	+	22	0	0
mmu-miR-6991-3p	chr19	7422621	7422642	+	22	0	0
mmu-miR-6992-5p	chr19	8742976	8742998	+	23	0	0
mmu-miR-6992-3p	chr19	8743058	8743079	+	22	0	0
mmu-miR-5136	chr19	8888709	8888728	-	20	0	0
mmu-miR-6993-5p	chr19	10191380	10191402	+	23	0	0
mmu-miR-6993-3p	chr19	10191419	10191439	+	21	0	0
mmu-miR-6994-5p	chr19	11923733	11923755	+	23	0	3.38731
mmu-miR-6994-3p	chr19	11923778	11923798	+	21	0	0
mmu-miR-496b	chr19	16314894	16314915	-	22	0	0
mmu-miR-204-5p	chr19	22750610	22750631	+	22	0	1.75099
mmu-miR-204-3p	chr19	22750649	22750669	+	21	0	0
mmu-miR-1192	chr19	23149450	23149471	+	22	0	0
mmu-miR-3084-5p	chr19	24942276	24942297	-	22	0	0
mmu-miR-3084-3p	chr19	24942240	24942260	-	21	3.84657	0
mmu-miR-101b-5p	chr19	29135302	29135324	+	23	0	5.09266
mmu-miR-101b-3p	chr19	29135338	29135356	+	19	10.8162	11.4979
mmu-miR-3970	chr19	33157122	33157141	+	20	0	0
mmu-miR-107-5p	chr19	34820737	34820759	-	23	2.11983	0.670366
mmu-miR-107-3p	chr19	34820700	34820722	-	23	8.74599	8.67846
mmu-miR-1950	chr19	34965402	34965423	+	22	1.41858	0
mmu-miR-8092	chr19	40894754	40894774	+	21	0	0
mmu-miR-8091	chr19	41588691	41588712	+	22	0	0
mmu-miR-3085-5p	chr19	42280131	42280155	-	25	0	0
mmu-miR-3085-3p	chr19	42280095	42280115	-	21	4.1483	4.31667
mmu-miR-5114	chr19	44303171	44303192	+	22	0	3.54183
mmu-miR-6405	chr19	44808501	44808523	+	23	0	0
mmu-miR-146b-5p	chr19	46342790	46342811	+	22	8.72902	8.35533
mmu-miR-146b-3p	chr19	46342828	46342849	+	22	0	0
mmu-miR-6995-5p	chr19	47273562	47273584	-	23	0	0
mmu-miR-6995-3p	chr19	47273519	47273539	-	21	0	0
mmu-miR-8090	chr19	47755062	47755081	-	20	0	0
mmu-miR-6407	chr19	53010679	53010701	-	23	0	0
mmu-miR-6715-5p	chr19	55192678	55192700	+	23	0	0
mmu-miR-6715-3p	chr19	55192714	55192734	+	21	0	0
mmu-miR-5623-5p	chr19	58051167	58051190	+	24	0	0
mmu-miR-5623-3p	chr19	58051215	58051236	+	22	0	0
mmu-miR-3086-5p	chr19	58911725	58911744	-	20	4.50791	0
mmu-miR-3086-3p	chr19	58911686	58911707	-	22	0	0
mmu-miR-466m-5p	chr2	10466677	10466699	+	23	0	0
mmu-miR-466m-3p	chr2	10466713	10466734	+	22	1.41858	3.6814
mmu-miR-466f-5p	chr2	10466954	10466975	+	22	4.39771	3.80864
mmu-miR-466f-3p	chr2	10466998	10467018	+	21	0	0
mmu-miR-669f-5p	chr2	10467248	10467271	+	24	4.70588	4.62405
mmu-miR-669f-3p	chr2	10467285	10467307	+	23	3.84657	3.21423
mmu-miR-669e-5p	chr2	10467537	10467558	+	22	2.94352	0.670366
mmu-miR-669e-3p	chr2	10467574	10467594	+	21	2.58968	0
mmu-miR-669b-5p	chr2	10467814	10467835	+	22	5.42057	5.77674
mmu-miR-669b-3p	chr2	10467851	10467873	+	23	0	1.12628
mmu-miR-669d-5p	chr2	10468384	10468405	+	22	4.50791	4.55312
mmu-miR-669d-3p	chr2	10468423	10468443	+	21	2.94352	0
mmu-miR-669l-5p	chr2	10468989	10469010	+	22	6.88418	5.86723
mmu-miR-669l-3p	chr2	10469027	10469048	+	22	2.58968	0
mmu-miR-669d-2-3p	chr2	10471696	10471717	+	22	2.94352	0
mmu-miR-297a-5p	chr2	10472264	10472285	+	22	0	0
mmu-miR-466o-5p	chr2	10472553	10472574	+	22	1.41858	0
mmu-miR-466o-3p	chr2	10472589	10472610	+	22	2.58968	0.670366
mmu-miR-467c-5p	chr2	10473941	10473962	+	22	8.8438	8.50845
mmu-miR-467c-3p	chr2	10473977	10473998	+	22	1.41858	3.38731
mmu-miR-466b-5p	chr2	10474228	10474249	+	22	1.41858	0
mmu-miR-466b-3p	chr2	10474269	10474290	+	22	0	0
mmu-miR-669a-5p	chr2	10474460	10474483	+	24	0	0
mmu-miR-669a-3-3p	chr2	10474496	10474518	+	23	0	0
mmu-miR-669k-5p	chr2	10475318	10475342	+	25	0	2.90809
mmu-miR-669k-3p	chr2	10475364	10475384	+	21	0	0
mmu-miR-467a-5p	chr2	10476355	10476376	+	22	0	0
mmu-miR-467a-3p	chr2	10476390	10476411	+	22	0	0
mmu-miR-669a-3p	chr2	10476908	10476930	+	23	0	0
mmu-miR-669g	chr2	10477170	10477192	+	23	1.41858	5.06743
mmu-miR-669j	chr2	10477989	10478010	+	22	0	0
mmu-miR-466e-5p	chr2	10479099	10479120	+	22	2.11983	0
mmu-miR-466e-3p	chr2	10479138	10479160	+	23	0	0
mmu-miR-467b-5p	chr2	10481256	10481276	+	21	0	0
mmu-miR-467b-3p	chr2	10481293	10481314	+	22	0	0
mmu-miR-466c-5p	chr2	10481544	10481567	+	24	4.39771	3.54183
mmu-miR-466c-3p	chr2	10481585	10481606	+	22	0	0
mmu-miR-669p-5p	chr2	10489130	10489153	+	24	0	0
mmu-miR-669p-3p	chr2	10489167	10489190	+	24	3.66818	0
mmu-miR-467e-5p	chr2	10505731	10505752	+	22	6.73353	5.88178
mmu-miR-467e-3p	chr2	10505768	10505789	+	22	1.41858	0
mmu-miR-466p-5p	chr2	10506020	10506040	+	21	1.41858	0.670366
mmu-miR-466p-3p	chr2	10506059	10506080	+	22	0	0
mmu-miR-467d-5p	chr2	10507640	10507661	+	22	8.33207	7.80727
mmu-miR-467d-3p	chr2	10507676	10507697	+	22	0	0
mmu-miR-466a-5p	chr2	10507928	10507949	+	22	2.58968	0.670366
mmu-miR-466a-3p	chr2	10507967	10507989	+	23	0	0
mmu-miR-297c-5p	chr2	10509026	10509047	+	22	2.94352	2.90809
mmu-miR-297c-3p	chr2	10509065	10509086	+	22	4.95968	0.670366
mmu-miR-669c-5p	chr2	10509319	10509340	+	22	6.92448	6.14556
mmu-miR-669c-3p	chr2	10509359	10509380	+	22	0	0
mmu-miR-297b-5p	chr2	10511686	10511707	+	22	3.22745	4.22838
mmu-miR-297b-3p	chr2	10511723	10511744	+	22	4.95968	0.670366
mmu-miR-466d-5p	chr2	10511977	10511998	+	22	5.17543	4.51631
mmu-miR-466d-3p	chr2	10512017	10512037	+	21	5.47585	0
mmu-miR-669m-5p	chr2	10512814	10512836	+	23	4.39771	4.72429
mmu-miR-669m-3p	chr2	10512847	10512868	+	22	2.11983	1.47219
mmu-miR-466n-5p	chr2	10513759	10513780	+	22	5.17543	4.51631
mmu-miR-466n-3p	chr2	10513798	10513819	+	22	5.17543	4.0849
mmu-miR-669o-5p	chr2	10514318	10514340	+	23	5.5291	4.0849
mmu-miR-669o-3p	chr2	10514355	10514377	+	23	0	0
mmu-miR-466g	chr2	10514642	10514662	+	21	4.95968	3.21423
mmu-miR-466h-5p	chr2	10514901	10514922	+	22	6.51339	4.58902
mmu-miR-466h-3p	chr2	10514940	10514958	+	19	4.00531	0
mmu-miR-297a-3p	chr2	10515869	10515890	+	22	4.95968	0.670366
mmu-miR-466l-5p	chr2	10516117	10516138	+	22	0	0
mmu-miR-466l-3p	chr2	10516156	10516177	+	22	0	0
mmu-miR-669i	chr2	10517671	10517691	+	21	0	0
mmu-miR-669h-5p	chr2	10518174	10518197	+	24	2.58968	3.98066
mmu-miR-669h-3p	chr2	10518219	10518240	+	22	0	0
mmu-miR-511-5p	chr2	14261013	14261033	+	21	0	0
mmu-miR-511-3p	chr2	14261051	14261072	+	22	0	0
mmu-miR-6419	chr2	17563541	17563562	+	22	0	0
mmu-miR-7655-5p	chr2	18057846	18057867	+	22	0	0
mmu-miR-7655-3p	chr2	18057882	18057903	+	22	0	0
mmu-miR-3967	chr2	22654321	22654340	+	20	0	0
mmu-miR-7664-5p	chr2	25059811	25059831	+	21	0	0
mmu-miR-7664-3p	chr2	25059851	25059873	+	23	0	0
mmu-miR-3087-5p	chr2	25442780	25442800	+	21	0	0
mmu-miR-3087-3p	chr2	25442813	25442833	+	21	2.94352	0
mmu-miR-6996-5p	chr2	26470094	26470114	-	21	0	0
mmu-miR-6996-3p	chr2	26470059	26470081	-	23	0	0
mmu-miR-126a-5p	chr2	26591365	26591385	+	21	9.71875	10.4271
mmu-miR-126a-3p	chr2	26591402	26591423	+	22	7.25987	6.00648
mmu-miR-126b-5p	chr2	26591399	26591420	-	22	0	0
mmu-miR-126b-3p	chr2	26591363	26591385	-	23	1.41858	0
mmu-miR-7578	chr2	27450549	27450572	-	24	0	0
mmu-miR-3088-5p	chr2	28733286	28733307	+	22	0	0
mmu-miR-3088-3p	chr2	28733321	28733343	+	23	0	0
mmu-miR-133c	chr2	29475217	29475239	-	23	0	0
mmu-miR-219a-2-3p	chr2	29845645	29845666	-	22	1.41858	0
mmu-miR-219b-5p	chr2	29845647	29845668	+	22	0	0
mmu-miR-219b-3p	chr2	29845689	29845711	+	23	2.94352	0
mmu-miR-6997-5p	chr2	29995955	29995976	+	22	0	0
mmu-miR-6997-3p	chr2	29995996	29996018	+	23	0	0
mmu-miR-3089-5p	chr2	30721222	30721243	+	22	0	0
mmu-miR-3089-3p	chr2	30721259	30721281	+	23	0	0
mmu-miR-6998-5p	chr2	31612426	31612447	+	22	0	0
mmu-miR-6998-3p	chr2	31612462	31612483	+	22	3.46458	0
mmu-miR-7674-5p	chr2	32050946	32050969	+	24	0	0
mmu-miR-7674-3p	chr2	32050988	32051008	+	21	0	0
mmu-miR-3154	chr2	32318317	32318338	+	22	0	0
mmu-miR-199b-5p	chr2	32318485	32318507	+	23	0	3.54183
mmu-miR-199b-3p	chr2	32318524	32318545	+	22	5.72437	6.55247
mmu-miR-1954	chr2	32652342	32652362	+	21	2.11983	0
mmu-miR-8093	chr2	32687706	32687726	-	21	0	0
mmu-miR-2861	chr2	32712819	32712837	-	19	0	0
mmu-miR-3960	chr2	32712907	32712926	-	20	0	0
mmu-miR-5128	chr2	37688212	37688234	-	23	5.5291	6.09652
mmu-miR-181a-2-3p	chr2	38852788	38852809	+	22	0	0.670366
mmu-miR-181b-2-3p	chr2	38853883	38853904	+	22	0	0
mmu-miR-6336	chr2	42447515	42447535	-	21	0	0
mmu-miR-5129-5p	chr2	45023146	45023167	-	22	0	0
mmu-miR-5129-3p	chr2	45023110	45023131	-	22	0	0
mmu-miR-195b	chr2	56785825	56785846	+	22	0	0
mmu-miR-6337	chr2	65364297	65364319	-	23	0	0
mmu-miR-7224-5p	chr2	67675457	67675477	+	21	0	0
mmu-miR-7224-3p	chr2	67675496	67675516	+	21	5.17543	5.7611
mmu-miR-6335	chr2	67781045	67781066	+	22	0	0
mmu-miR-10b-5p	chr2	74726074	74726096	+	23	6.28481	5.4458
mmu-miR-10b-3p	chr2	74726114	74726135	+	22	0	0
mmu-miR-684	chr2	80628714	80628732	-	19	0	0
mmu-miR-130a-5p	chr2	84741155	84741176	-	22	4.27839	1.47219
mmu-miR-130a-3p	chr2	84741116	84741137	-	22	12.5946	12.8021
mmu-miR-6999-5p	chr2	91944908	91944930	-	23	0	0
mmu-miR-6999-3p	chr2	91944872	91944893	-	22	0	0
mmu-miR-1955-5p	chr2	92191994	92192018	+	25	0	0
mmu-miR-1955-3p	chr2	92192035	92192055	+	21	0	1.12628
mmu-miR-7000-5p	chr2	92387420	92387441	-	22	0	0
mmu-miR-7000-3p	chr2	92387384	92387405	-	22	0	0
mmu-miR-7221-5p	chr2	92592206	92592226	+	21	0	0
mmu-miR-7221-3p	chr2	92592257	92592277	+	21	0	0
mmu-miR-7222-5p	chr2	92594602	92594628	+	27	0	0
mmu-miR-7222-3p	chr2	92594654	92594676	+	23	0	0
mmu-miR-7001-5p	chr2	93421980	93422002	-	23	0	0
mmu-miR-7001-3p	chr2	93421929	93421948	-	20	0	0
mmu-miR-129-5p	chr2	94241419	94241439	-	21	5.5291	6.26132
mmu-miR-129-2-3p	chr2	94241376	94241397	-	22	2.11983	0
mmu-miR-129b-5p	chr2	94241378	94241399	+	22	0	0
mmu-miR-129b-3p	chr2	94241420	94241442	+	23	0	0
mmu-miR-670-5p	chr2	94261358	94261379	-	22	0	0
mmu-miR-670-3p	chr2	94261316	94261340	-	25	0	0
mmu-miR-1902	chr2	104428871	104428892	-	22	0	0
mmu-miR-7002-5p	chr2	114150547	114150567	-	21	0	0
mmu-miR-7002-3p	chr2	114150516	114150534	-	19	0	0
mmu-miR-1951	chr2	115638777	115638798	+	22	0	0
mmu-miR-674-5p	chr2	117185151	117185172	+	22	6.28481	6.2389
mmu-miR-674-3p	chr2	117185186	117185207	+	22	8.43331	7.71687
mmu-miR-7665-5p	chr2	120017517	120017539	+	23	0	0
mmu-miR-7665-3p	chr2	120017558	120017579	+	22	0	0
mmu-miR-147-5p	chr2	122640814	122640837	+	24	0	0
mmu-miR-147-3p	chr2	122640850	122640871	+	22	5.58045	3.80864
mmu-miR-3473g	chr2	126902290	126902309	-	20	3.46458	4.39987
mmu-miR-6339	chr2	130016369	130016391	-	23	0	0
mmu-miR-6973b-5p	chr2	131040375	131040398	-	24	0	0
mmu-miR-6973b-3p	chr2	131040326	131040345	-	20	3.66818	0
mmu-miR-103-2-5p	chr2	131288066	131288088	+	23	0	0
mmu-miR-3090-5p	chr2	133564722	133564742	+	21	0	0
mmu-miR-3090-3p	chr2	133564760	133564781	+	22	0	0
mmu-miR-1952	chr2	138819943	138819959	+	17	0	0
mmu-miR-1953	chr2	151967581	151967602	-	22	0	0
mmu-miR-5622-5p	chr2	152865067	152865088	+	22	0	0
mmu-miR-5622-3p	chr2	152865105	152865126	+	22	0	0
mmu-miR-695	chr2	155356831	155356852	+	22	0	0
mmu-miR-499-5p	chr2	155622893	155622913	+	21	3.66818	3.98066
mmu-miR-499-3p	chr2	155622929	155622951	+	23	0	3.54183
mmu-miR-7685-5p	chr2	158243542	158243565	-	24	0	0
mmu-miR-7685-3p	chr2	158243504	158243524	-	21	0	0
mmu-miR-3474	chr2	158638583	158638604	+	22	1.41858	0
mmu-miR-7003-5p	chr2	163068095	163068115	+	21	0	0
mmu-miR-7003-3p	chr2	163068137	163068155	+	19	0	0
mmu-miR-7678-5p	chr2	164354363	164354383	-	21	0	0
mmu-miR-7678-3p	chr2	164354313	164354334	-	22	0	0
mmu-miR-7004-5p	chr2	168640731	168640754	-	24	0	0
mmu-miR-7004-3p	chr2	168640696	168640716	-	21	0	0
mmu-miR-6340	chr2	173701098	173701120	-	23	0	0
mmu-miR-296-5p	chr2	174267093	174267113	-	21	7.27553	5.85254
mmu-miR-296-3p	chr2	174267058	174267079	-	22	8.20695	9.29046
mmu-miR-298-5p	chr2	174267553	174267575	-	23	14.1255	14.2672
mmu-miR-298-3p	chr2	174267514	174267535	-	22	4.1483	3.74642
mmu-miR-7005-5p	chr2	180179797	180179818	-	22	0	0
mmu-miR-7005-3p	chr2	180179756	180179780	-	25	0	0
mmu-miR-3091-5p	chr2	180257547	180257567	+	21	4.27839	2.51899
mmu-miR-3091-3p	chr2	180257580	180257601	+	22	0	0
mmu-miR-1a-1-5p	chr2	180389057	180389079	+	23	0	0
mmu-miR-7006-5p	chr2	181587939	181587963	-	25	0	0
mmu-miR-7006-3p	chr2	181587900	181587919	-	20	0	0
mmu-miR-7007-5p	chr3	20222332	20222354	-	23	0	0
mmu-miR-7007-3p	chr3	20222294	20222311	-	18	0	0
mmu-miR-3092-5p	chr3	27584958	27584979	-	22	0	0
mmu-miR-3092-3p	chr3	27584915	27584935	-	21	0	0
mmu-miR-466q	chr3	28419988	28420007	+	20	0	0
mmu-miR-551b-5p	chr3	29416840	29416862	+	23	0	0
mmu-miR-551b-3p	chr3	29416879	29416899	+	21	0	0
mmu-miR-21b	chr3	29636768	29636790	+	23	0	2.1855
mmu-miR-7008-5p	chr3	31038971	31038994	+	24	0	0
mmu-miR-7008-3p	chr3	31039007	31039028	+	22	0	0
mmu-miR-1897-5p	chr3	34638474	34638495	+	22	0	0
mmu-miR-1897-3p	chr3	34638511	34638532	+	22	0	0
mmu-miR-6378	chr3	34922623	34922644	-	22	0	0
mmu-miR-7009-5p	chr3	36475498	36475519	-	22	0	0
mmu-miR-7009-3p	chr3	36475461	36475481	-	21	0	0
mmu-miR-6379	chr3	46900700	46900721	-	22	0	0
mmu-miR-6377	chr3	57616699	57616721	+	23	0	0
mmu-miR-8120	chr3	65659328	65659349	+	22	0	0
mmu-miR-15b-5p	chr3	69009775	69009796	+	22	8.76831	8.09317
mmu-miR-15b-3p	chr3	69009813	69009834	+	22	4.50791	5.30181
mmu-miR-16-2-3p	chr3	69009960	69009981	+	22	4.27839	4.62405
mmu-miR-7010-5p	chr3	82106284	82106305	-	22	0	0
mmu-miR-7010-3p	chr3	82106248	82106268	-	21	0	0
mmu-miR-466k	chr3	85467396	85467418	+	23	0	4.13433
mmu-miR-3093-5p	chr3	88215186	88215207	+	22	0	0
mmu-miR-3093-3p	chr3	88215226	88215247	+	22	0	0
mmu-miR-7011-5p	chr3	88440924	88440946	-	23	0	0
mmu-miR-7011-3p	chr3	88440879	88440899	-	21	0	0
mmu-miR-1905	chr3	88536311	88536332	-	22	0	0
mmu-miR-92b-5p	chr3	89227165	89227188	-	24	3.22745	5.30181
mmu-miR-92b-3p	chr3	89227126	89227147	-	22	13.6298	13.992
mmu-miR-7669-5p	chr3	90011188	90011210	-	23	0	0
mmu-miR-7669-3p	chr3	90011153	90011175	-	23	0	0
mmu-miR-190b-5p	chr3	90070030	90070050	+	21	3.66818	0
mmu-miR-190b-3p	chr3	90070067	90070089	+	23	3.66818	0
mmu-miR-7012-5p	chr3	90270154	90270176	+	23	0	0
mmu-miR-7012-3p	chr3	90270191	90270212	+	22	0	0
mmu-miR-7013-5p	chr3	95004173	95004194	+	22	0	0
mmu-miR-7013-3p	chr3	95004213	95004236	+	24	0	0
mmu-miR-7014-5p	chr3	95734947	95734968	-	22	0	0
mmu-miR-7014-3p	chr3	95734911	95734931	-	21	0	0
mmu-miR-7225-5p	chr3	97690543	97690562	-	20	0	0
mmu-miR-7225-3p	chr3	97690509	97690530	-	22	0	0
mmu-miR-6481	chr3	99199367	99199385	-	19	0	0
mmu-miR-669n	chr3	115979905	115979924	+	20	0	0
mmu-miR-137-5p	chr3	118433865	118433887	+	23	0	0
mmu-miR-137-3p	chr3	118433901	118433923	+	23	0	0
mmu-miR-760-5p	chr3	122293649	122293671	-	23	0	0
mmu-miR-760-3p	chr3	122293615	122293634	-	20	2.94352	6.98177
mmu-miR-7657-5p	chr3	122541661	122541681	-	21	0	0
mmu-miR-7657-3p	chr3	122541625	122541647	-	23	0	0
mmu-miR-302b-5p	chr3	127545238	127545260	+	23	0	0
mmu-miR-302b-3p	chr3	127545275	127545297	+	23	4.00531	2.1855
mmu-miR-302c-5p	chr3	127545368	127545389	+	22	0	4.13433
mmu-miR-302c-3p	chr3	127545406	127545427	+	22	3.22745	0
mmu-miR-302a-5p	chr3	127545501	127545522	+	22	0	3.01751
mmu-miR-302a-3p	chr3	127545539	127545561	+	23	5.03524	6.00648
mmu-miR-302d-5p	chr3	127545629	127545651	+	23	0	2.90809
mmu-miR-302d-3p	chr3	127545665	127545687	+	23	5.67798	3.74642
mmu-miR-367-5p	chr3	127545741	127545761	+	21	0	0
mmu-miR-367-3p	chr3	127545779	127545800	+	22	2.58968	3.74642
mmu-miR-1895	chr3	134240515	134240536	-	22	0	0
mmu-miR-6380	chr3	137783536	137783559	-	24	0	0
mmu-miR-1956	chr3	138526425	138526446	+	22	0	0
mmu-let-7j	chr3	140028281	140028304	+	24	0	0
mmu-miR-6381	chr3	142623925	142623945	-	21	0	0
mmu-miR-3963	chr3	151023839	151023857	-	19	6.34544	0
mmu-miR-186-5p	chr3	157544285	157544306	+	22	12.3944	12.5453
mmu-miR-186-3p	chr3	157544324	157544345	+	22	0	3.46664
mmu-miR-3471	chr4	3537103	3537124	+	22	0	0
mmu-miR-6400	chr4	15942907	15942927	-	21	0	0
mmu-miR-8118	chr4	33438153	33438174	+	22	0	0
mmu-miR-876-5p	chr4	36645422	36645443	-	22	0	0
mmu-miR-876-3p	chr4	36645383	36645404	-	22	0	0
mmu-miR-873a-5p	chr4	36668556	36668576	-	21	0	0
mmu-miR-873a-3p	chr4	36668520	36668540	-	21	0	0
mmu-miR-873b	chr4	36668565	36668586	+	22	0	0
mmu-miR-207	chr4	40722968	40722990	+	23	0	0
mmu-miR-5123	chr4	40850057	40850080	-	24	0	2.36186
mmu-miR-3094-5p	chr4	40993696	40993716	+	21	0	0
mmu-miR-3094-3p	chr4	40993738	40993758	+	21	0	0
mmu-miR-5106	chr4	44221197	44221219	-	23	1.41858	2.1855
mmu-miR-5120	chr4	44607536	44607558	-	23	0	0
mmu-miR-1958	chr4	48213134	48213155	-	22	0	0
mmu-miR-32-5p	chr4	56895272	56895293	-	22	5.85523	5.64652
mmu-miR-32-3p	chr4	56895232	56895252	-	21	3.22745	5.14183
mmu-miR-3095-5p	chr4	58441064	58441085	-	22	0	0
mmu-miR-3095-3p	chr4	58441023	58441045	-	23	0	0
mmu-miR-455-5p	chr4	63256867	63256888	+	22	3.46458	3.98066
mmu-miR-455-3p	chr4	63256904	63256924	+	21	0	0
mmu-miR-491-5p	chr4	88122057	88122078	+	22	0	0
mmu-miR-491-3p	chr4	88122091	88122112	+	22	0	0
mmu-miR-31-5p	chr4	88910614	88910635	-	22	8.51476	9.07953
mmu-miR-31-3p	chr4	88910577	88910599	-	23	4.27839	0
mmu-miR-6402	chr4	91373285	91373307	-	23	0	0
mmu-miR-872-5p	chr4	94665167	94665187	+	21	8.98864	9.12914
mmu-miR-872-3p	chr4	94665206	94665227	+	22	9.52595	9.7269
mmu-miR-101a-5p	chr4	101346993	101347014	-	22	3.66818	0
mmu-miR-101a-3p	chr4	101346957	101346977	-	21	11.4392	11.2419
mmu-miR-6397	chr4	108087414	108087434	+	21	0	0
mmu-miR-761	chr4	109017669	109017690	+	22	0	0
mmu-miR-7226-5p	chr4	118210539	118210564	-	26	0	0
mmu-miR-7226-3p	chr4	118210505	118210527	-	23	4.1483	1.47219
mmu-miR-1957a	chr4	119129792	119129810	+	19	0	0
mmu-miR-30c-1-3p	chr4	120769546	120769567	-	22	5.81292	5.52206
mmu-miR-30f	chr4	120772621	120772642	+	22	0	0
mmu-miR-30e-5p	chr4	120772660	120772681	-	22	13.2744	14.0485
mmu-miR-30e-3p	chr4	120772618	120772639	-	22	8.61051	9.76957
mmu-miR-7015-5p	chr4	120973295	120973317	-	23	0	0
mmu-miR-7015-3p	chr4	120973259	120973279	-	21	1.41858	3.54183
mmu-miR-6398	chr4	123616493	123616513	+	21	0	0
mmu-miR-697	chr4	124731768	124731788	+	21	0	0
mmu-miR-698-3p	chr4	124743852	124743870	+	19	0	0
mmu-miR-698-5p	chr4	124743818	124743838	+	21	0	0
mmu-miR-7119-5p	chr4	126559865	126559885	+	21	0	0
mmu-miR-7119-3p	chr4	126559898	126559918	+	21	0	0
mmu-miR-8119	chr4	129557756	129557775	-	20	0	0
mmu-miR-7016-5p	chr4	129684546	129684566	-	21	0	0
mmu-miR-7016-3p	chr4	129684500	129684521	-	22	0	0
mmu-miR-7017-5p	chr4	133195660	133195683	+	24	0	0
mmu-miR-7017-3p	chr4	133195696	133195716	+	21	0	0
mmu-miR-5122	chr4	133369784	133369803	+	20	2.58968	0
mmu-miR-7227-5p	chr4	133717089	133717108	-	20	0	0
mmu-miR-7227-3p	chr4	133717050	133717071	-	22	0	0
mmu-miR-6403	chr4	134567757	134567778	-	22	0	0
mmu-miR-700-5p	chr4	135416601	135416622	-	22	4.50791	1.47219
mmu-miR-700-3p	chr4	135416561	135416581	-	21	3.84657	0
mmu-miR-7018-5p	chr4	137538286	137538309	+	24	0	0
mmu-miR-7018-3p	chr4	137538349	137538370	+	22	0	4.22838
mmu-miR-6399	chr4	138163263	138163284	+	22	1.41858	0
mmu-miR-7019-5p	chr4	138316173	138316195	-	23	0	0
mmu-miR-7019-3p	chr4	138316132	138316154	-	23	0	0
mmu-miR-7020-5p	chr4	139644047	139644070	+	24	0	0
mmu-miR-7020-3p	chr4	139644091	139644111	+	21	0	0
mmu-miR-2139	chr4	139967531	139967554	-	24	0	0
mmu-miR-7021-5p	chr4	143136136	143136157	-	22	0	0
mmu-miR-7021-3p	chr4	143136100	143136121	-	22	0	0
mmu-miR-7022-5p	chr4	148146973	148146995	-	23	0	0
mmu-miR-7022-3p	chr4	148146937	148146958	-	22	0	0
mmu-miR-5616-5p	chr4	149537863	149537883	+	21	0	0
mmu-miR-5616-3p	chr4	149537901	149537922	+	22	0	0
mmu-miR-7023-5p	chr4	149655540	149655562	-	23	0	0
mmu-miR-7023-3p	chr4	149655504	149655525	-	22	0	0
mmu-miR-34a-5p	chr4	150068473	150068494	+	22	8.67098	8.28594
mmu-miR-34a-3p	chr4	150068517	150068537	+	21	4.50791	1.98455
mmu-miR-429-5p	chr4	156053954	156053974	-	21	0	0
mmu-miR-429-3p	chr4	156053916	156053937	-	22	9.23687	9.5228
mmu-miR-200a-5p	chr4	156054949	156054970	-	22	5.9752	5.91044
mmu-miR-200a-3p	chr4	156054911	156054932	-	22	8.48812	8.45596
mmu-miR-200b-5p	chr4	156055721	156055742	-	22	2.58968	0
mmu-miR-200b-3p	chr4	156055685	156055706	-	22	10.4037	10.4937
mmu-miR-7658-5p	chr4	156230096	156230115	-	20	0	0
mmu-miR-7658-3p	chr4	156230059	156230079	-	21	0	0
mmu-miR-879-5p	chr5	9375714	9375734	+	21	4.70588	5.74527
mmu-miR-879-3p	chr5	9375748	9375769	+	22	2.94352	0
mmu-miR-671-5p	chr5	24592132	24592154	+	23	4.1483	0
mmu-miR-671-3p	chr5	24592171	24592191	+	21	5.03524	5.77674
mmu-miR-1960	chr5	30170751	30170772	+	22	2.58968	2.66067
mmu-miR-5625-5p	chr5	30647936	30647956	+	21	0	0
mmu-miR-5625-3p	chr5	30647991	30648015	+	25	0	0
mmu-miR-3473e	chr5	31667296	31667316	-	21	0	0
mmu-miR-7024-5p	chr5	33898946	33898966	-	21	0	0
mmu-miR-7024-3p	chr5	33898910	33898932	-	23	0	0
mmu-miR-7036b-5p	chr5	34574151	34574172	+	22	0	0
mmu-miR-7036b-3p	chr5	34574192	34574213	+	22	3.46458	0
mmu-miR-467g	chr5	34732872	34732892	-	21	0	0
mmu-miR-3097-5p	chr5	35021050	35021072	+	23	0	0
mmu-miR-3097-3p	chr5	35021094	35021115	+	22	0	0
mmu-miR-7689-5p	chr5	36301570	36301588	+	19	0	0
mmu-miR-7689-3p	chr5	36301606	36301628	+	23	0	0
mmu-miR-6414	chr5	41891400	41891421	+	22	0	0
mmu-miR-218-1-3p	chr5	48224005	48224026	+	22	0	3.54183
mmu-miR-8117	chr5	50252823	50252843	+	21	0	0
mmu-miR-6417	chr5	52135972	52135993	-	22	0	0
mmu-miR-574-5p	chr5	64970328	64970350	+	23	0	0
mmu-miR-574-3p	chr5	64970364	64970385	+	22	3.84657	0
mmu-miR-7025-5p	chr5	75176836	75176859	+	24	0	0
mmu-miR-7025-3p	chr5	75176878	75176899	+	22	0	0
mmu-miR-5098	chr5	77272767	77272787	+	21	0	0
mmu-miR-1187	chr5	82798964	82798986	-	23	0	0
mmu-miR-3969	chr5	87595963	87595982	-	20	0	0.670366
mmu-miR-6415	chr5	92458559	92458580	+	22	0	0
mmu-miR-1961	chr5	92788465	92788481	-	17	0	0
mmu-miR-703	chr5	98475616	98475636	-	21	0	0
mmu-miR-5619-5p	chr5	104048003	104048023	+	21	0	0
mmu-miR-5619-3p	chr5	104048042	104048063	+	22	0	0
mmu-miR-7026-5p	chr5	110666116	110666136	-	21	0	0
mmu-miR-7026-3p	chr5	110666075	110666097	-	23	0	0
mmu-miR-701-5p	chr5	111004170	111004190	+	21	0	0
mmu-miR-701-3p	chr5	111004208	111004227	+	20	0	0
mmu-miR-7229-5p	chr5	113324525	113324545	-	21	0	0
mmu-miR-7229-3p	chr5	113324493	113324516	-	24	0	0
mmu-miR-7230-5p	chr5	113337623	113337645	-	23	0	0
mmu-miR-7230-3p	chr5	113337590	113337612	-	23	0	0
mmu-miR-7027-5p	chr5	114404473	114404495	+	23	0	0
mmu-miR-7027-3p	chr5	114404518	114404539	+	22	2.58968	0
mmu-miR-7028-5p	chr5	114719515	114719537	+	23	0	0
mmu-miR-7028-3p	chr5	114719557	114719578	+	22	0	0
mmu-miR-6240	chr5	114851973	114851998	+	26	10.8322	8.52012
mmu-miR-7029-5p	chr5	115580954	115580976	+	23	0	0
mmu-miR-7029-3p	chr5	115580984	115581005	+	22	0	0
mmu-miR-7030-5p	chr5	115645578	115645599	+	22	0	0
mmu-miR-7030-3p	chr5	115645612	115645632	+	21	0	0
mmu-miR-7031-5p	chr5	121819246	121819268	-	23	0	0
mmu-miR-7031-3p	chr5	121819209	121819229	-	21	0	0
mmu-miR-8115	chr5	122682664	122682685	+	22	0	4.98899
mmu-miR-7647-5p	chr5	123522674	123522695	-	22	0	0
mmu-miR-7647-3p	chr5	123522637	123522657	-	21	0	0
mmu-miR-7032-5p	chr5	123996857	123996882	+	26	0	0
mmu-miR-7032-3p	chr5	123996908	123996929	+	22	0	0
mmu-miR-3965	chr5	134326494	134326512	+	19	0	0
mmu-miR-7228-5p	chr5	134572076	134572094	+	19	0	0
mmu-miR-7228-3p	chr5	134572098	134572114	+	17	0	0
mmu-miR-7033-5p	chr5	135383783	135383805	-	23	0	0
mmu-miR-7033-3p	chr5	135383730	135383750	-	21	0	0
mmu-miR-7034-5p	chr5	135735864	135735884	-	21	0	0
mmu-miR-7034-3p	chr5	135735807	135735830	-	24	0	0
mmu-miR-7035-5p	chr5	136105527	136105547	+	21	0	0
mmu-miR-7035-3p	chr5	136105583	136105603	+	21	0	0
mmu-miR-721	chr5	136375777	136375797	-	21	0	0
mmu-miR-702-3p	chr5	136991520	136991541	+	22	5.36308	5.21257
mmu-miR-702-5p	chr5	136991442	136991462	+	21	3.84657	5.18937
mmu-miR-8116	chr5	137293800	137293820	+	21	0	0
mmu-miR-7036a-5p	chr5	137296661	137296683	-	23	0	0
mmu-miR-7036a-3p	chr5	137296624	137296646	-	23	0	0
mmu-miR-6418-5p	chr5	137529551	137529571	-	21	0	0
mmu-miR-6418-3p	chr5	137529509	137529530	-	22	0	0
mmu-miR-25-5p	chr5	138165370	138165391	-	22	7.94815	8.39643
mmu-miR-25-3p	chr5	138165332	138165353	-	22	13.0064	12.8473
mmu-miR-93-5p	chr5	138165574	138165596	-	23	12.5279	12.3665
mmu-miR-93-3p	chr5	138165536	138165557	-	22	6.6154	6.77136
mmu-miR-106b-5p	chr5	138165787	138165807	-	21	9.91904	10.2763
mmu-miR-106b-3p	chr5	138165746	138165767	-	22	9.39582	9.05888
mmu-miR-339-5p	chr5	139369708	139369730	-	23	5.89634	7.07332
mmu-miR-339-3p	chr5	139369673	139369695	-	23	5.03524	5.8377
mmu-miR-7037-5p	chr5	139767915	139767938	-	24	0	0
mmu-miR-7037-3p	chr5	139767879	139767900	-	22	0	0
mmu-miR-7038-5p	chr5	140427344	140427365	+	22	0	0
mmu-miR-7038-3p	chr5	140427388	140427409	+	22	0	0
mmu-miR-7039-5p	chr5	144896790	144896811	-	22	0	0
mmu-miR-7039-3p	chr5	144896732	144896753	-	22	0	0
mmu-let-7k	chr5	147283257	147283275	-	19	0	0
mmu-miR-653-5p	chr6	3721355	3721375	-	21	3.46458	5.54051
mmu-miR-653-3p	chr6	3721315	3721335	-	21	0	0
mmu-miR-489-3p	chr6	3721922	3721944	-	23	2.58968	0
mmu-miR-489-5p	chr6	3721957	3721981	-	25	0	0
mmu-miR-6370	chr6	19555438	19555458	+	21	0	0
mmu-miR-592-5p	chr6	27936711	27936733	-	23	0	0
mmu-miR-592-3p	chr6	27936672	27936693	-	22	0	0
mmu-miR-129-1-3p	chr6	29022667	29022688	+	22	0	0
mmu-miR-182-5p	chr6	30165962	30165986	-	25	16.7976	16.3188
mmu-miR-182-3p	chr6	30165923	30165943	-	21	6.34544	5.57672
mmu-miR-96-5p	chr6	30169506	30169528	-	23	8.91554	7.81107
mmu-miR-96-3p	chr6	30169465	30169486	-	22	4.95968	3.30336
mmu-miR-183-5p	chr6	30169711	30169732	-	22	13.339	13.1534
mmu-miR-183-3p	chr6	30169672	30169693	-	22	8.2232	8.73363
mmu-miR-335-5p	chr6	30741314	30741336	+	23	8.48812	9.01667
mmu-miR-335-3p	chr6	30741354	30741375	+	22	10.6889	10.146
mmu-miR-29a-5p	chr6	31062711	31062732	-	22	0	0
mmu-miR-29a-3p	chr6	31062673	31062694	-	22	7.29103	6.29432
mmu-miR-29b-1-5p	chr6	31063067	31063088	-	22	0	0
mmu-miR-490-5p	chr6	36421763	36421782	+	20	0	0
mmu-miR-490-3p	chr6	36421800	36421821	+	22	0	0
mmu-miR-7670-5p	chr6	38507325	38507346	+	22	0	0
mmu-miR-7670-3p	chr6	38507371	38507393	+	23	0	0
mmu-miR-704	chr6	47803590	47803610	-	21	0	0
mmu-miR-6371	chr6	50572459	50572481	+	23	0	0
mmu-miR-148a-5p	chr6	51269867	51269888	-	22	7.64467	8.24152
mmu-miR-148a-3p	chr6	51269829	51269850	-	22	12.8346	12.3052
mmu-miR-196b-5p	chr6	52230129	52230150	-	22	0	0
mmu-miR-196b-3p	chr6	52230094	52230115	-	22	0	0
mmu-miR-8112	chr6	71271745	71271764	+	20	0	0
mmu-miR-7232-5p	chr6	81895640	81895663	-	24	0	0
mmu-miR-7232-3p	chr6	81895590	81895611	-	22	0	0
mmu-miR-468-3p	chr6	81896602	81896624	-	23	0	0
mmu-miR-468-5p	chr6	81896629	81896655	-	27	0	0
mmu-miR-7040-5p	chr6	83049716	83049737	+	22	0	0
mmu-miR-7040-3p	chr6	83049752	83049773	+	22	0	0
mmu-miR-3470a	chr6	83090360	83090380	-	21	0	0
mmu-miR-6374	chr6	83401060	83401081	-	22	0	0
mmu-miR-705	chr6	85336341	85336360	-	20	0	0
mmu-miR-6375	chr6	85790203	85790225	-	23	0	0
mmu-miR-6376	chr6	88104204	88104225	-	22	0	0
mmu-miR-7041-5p	chr6	94606388	94606410	-	23	1.41858	0
mmu-miR-7041-3p	chr6	94606364	94606383	-	20	0	0
mmu-miR-6373	chr6	102794445	102794466	+	22	0	0
mmu-miR-7661-5p	chr6	108489743	108489767	+	25	0	0
mmu-miR-7661-3p	chr6	108489782	108489803	+	22	1.41858	0
mmu-miR-7042-5p	chr6	113707213	113707233	+	21	0	3.92557
mmu-miR-7042-3p	chr6	113707245	113707265	+	21	0	0
mmu-miR-7660-5p	chr6	115775657	115775678	+	22	0	0
mmu-miR-7660-3p	chr6	115775697	115775719	+	23	0	0
mmu-miR-7043-5p	chr6	116646020	116646042	-	23	0	0
mmu-miR-7043-3p	chr6	116645978	116645998	-	21	0	0
mmu-miR-7044-5p	chr6	118085197	118085215	+	19	0	0
mmu-miR-7044-3p	chr6	118085243	118085263	+	21	0	0
mmu-miR-706	chr6	120034290	120034311	-	22	0	0
mmu-miR-7231-5p	chr6	122831377	122831398	+	22	0	0
mmu-miR-7231-3p	chr6	122831415	122831437	+	23	0	0
mmu-miR-141-5p	chr6	124717959	124717980	-	22	2.58968	5.92455
mmu-miR-141-3p	chr6	124717917	124717938	-	22	7.16213	7.88874
mmu-miR-200c-5p	chr6	124718365	124718386	-	22	0	0
mmu-miR-200c-3p	chr6	124718324	124718346	-	23	5.85523	5.42609
mmu-miR-7045-5p	chr6	125097029	125097049	+	21	0	0
mmu-miR-7045-3p	chr6	125097066	125097086	+	21	0	0
mmu-miR-3098-5p	chr6	125195807	125195828	+	22	5.10704	4.51631
mmu-miR-3098-3p	chr6	125195845	125195865	+	21	2.11983	4.43973
mmu-miR-8113	chr6	125234756	125234777	-	22	0	0
mmu-miR-7233-5p	chr6	127788125	127788143	-	19	0	0
mmu-miR-7233-3p	chr6	127788084	127788105	-	22	0	0
mmu-miR-7649-5p	chr6	128974874	128974895	-	22	0	0
mmu-miR-7649-3p	chr6	128974840	128974862	-	23	0	0
mmu-miR-290a-5p	chr7	3218639	3218660	+	22	10.1384	9.80625
mmu-miR-290a-3p	chr7	3218674	3218697	+	24	7.09308	6.75565
mmu-miR-290b-5p	chr7	3218674	3218695	-	22	0	0
mmu-miR-290b-3p	chr7	3218638	3218659	-	22	0	0
mmu-miR-291a-5p	chr7	3218932	3218953	+	22	14.192	13.9006
mmu-miR-291a-3p	chr7	3218968	3218989	+	22	12.4175	12.5927
mmu-miR-292a-5p	chr7	3219200	3219221	+	22	14.9803	15.2805
mmu-miR-292a-3p	chr7	3219238	3219261	+	24	14.4526	14.2433
mmu-miR-292b-5p	chr7	3219237	3219259	-	23	0	0
mmu-miR-292b-3p	chr7	3219198	3219218	-	21	0	0
mmu-miR-291b-5p	chr7	3219494	3219515	+	22	9.22482	9.65252
mmu-miR-291b-3p	chr7	3219529	3219550	+	22	8.16551	7.61173
mmu-miR-293-5p	chr7	3220356	3220377	+	22	14.3671	14.8309
mmu-miR-293-3p	chr7	3220390	3220411	+	22	13.9349	13.5397
mmu-miR-294-5p	chr7	3220655	3220676	+	22	8.67689	8.89468
mmu-miR-294-3p	chr7	3220691	3220712	+	22	13.4231	13.1785
mmu-miR-295-5p	chr7	3220779	3220800	+	22	10.0726	11.6573
mmu-miR-295-3p	chr7	3220815	3220837	+	23	17.4311	17.2319
mmu-miR-935	chr7	3415120	3415143	+	24	0	3.46664
mmu-miR-3572-3p	chr7	3656010	3656032	+	23	0	0
mmu-miR-3572-5p	chr7	3655970	3655991	+	22	0	0
mmu-miR-3099-5p	chr7	6803600	6803620	+	21	0	0
mmu-miR-3099-3p	chr7	6803638	6803659	+	22	0	3.30336
mmu-miR-5620-5p	chr7	7298891	7298913	+	23	0	0
mmu-miR-5620-3p	chr7	7298926	7298946	+	21	0	0
mmu-miR-3100-5p	chr7	19086828	19086850	+	23	0	0
mmu-miR-3100-3p	chr7	19086872	19086892	+	21	0	0
mmu-miR-330-5p	chr7	19181486	19181507	+	22	8.65311	7.37008
mmu-miR-330-3p	chr7	19181525	19181547	+	23	2.94352	5.57672
mmu-miR-343	chr7	19386688	19386707	+	20	0	0
mmu-miR-7046-5p	chr7	24970047	24970070	-	24	0	0
mmu-miR-7046-3p	chr7	24970010	24970031	-	22	3.84657	0
mmu-miR-7047-5p	chr7	24987640	24987662	-	23	0	0
mmu-miR-7047-3p	chr7	24987606	24987628	-	23	0	0
mmu-miR-6537-5p	chr7	25097120	25097141	-	22	0	0
mmu-miR-6537-3p	chr7	25097089	25097111	-	23	0	0
mmu-miR-7048-5p	chr7	25217699	25217720	-	22	0	0
mmu-miR-7048-3p	chr7	25217668	25217688	-	21	0	0
mmu-miR-3101-5p	chr7	27176058	27176078	-	21	0	0
mmu-miR-3101-3p	chr7	27176020	27176040	-	21	0	0
mmu-miR-1191a	chr7	27205615	27205635	+	21	5.9752	6.46823
mmu-miR-7049-5p	chr7	28560957	28560979	-	23	0	1.75099
mmu-miR-7049-3p	chr7	28560925	28560945	-	21	0	0
mmu-miR-1963	chr7	29083671	29083693	-	23	0	0
mmu-miR-1964-5p	chr7	29773305	29773326	+	22	0	0
mmu-miR-1964-3p	chr7	29773344	29773365	+	22	0	0
mmu-miR-7668-5p	chr7	29906509	29906532	+	24	0	0
mmu-miR-7668-3p	chr7	29906546	29906567	+	22	0	4.13433
mmu-miR-9769-5p	chr7	30552839	30552860	+	22	0	0
mmu-miR-9769-3p	chr7	30552871	30552892	+	22	0	0
mmu-miR-3569-5p	chr7	30589380	30589400	+	21	0	0
mmu-miR-3569-3p	chr7	30589416	30589437	+	22	0	0
mmu-miR-7050-5p	chr7	31040292	31040312	-	21	0	0
mmu-miR-7050-3p	chr7	31040258	31040278	-	21	0	0
mmu-miR-7051-5p	chr7	43457502	43457523	+	22	0	3.74642
mmu-miR-7051-3p	chr7	43457546	43457567	+	22	0	0
mmu-miR-7052-5p	chr7	44470352	44470372	+	21	0	0
mmu-miR-7052-3p	chr7	44470391	44470411	+	21	0	0
mmu-miR-7053-5p	chr7	44538153	44538173	-	21	0	0
mmu-miR-7053-3p	chr7	44538106	44538126	-	21	0	1.98455
mmu-miR-707	chr7	44849705	44849725	+	21	0	0
mmu-miR-7054-5p	chr7	45012458	45012482	-	25	0	0
mmu-miR-7054-3p	chr7	45012426	45012445	-	20	0	0
mmu-miR-150-5p	chr7	45121762	45121783	+	22	10.1722	10.5386
mmu-miR-150-3p	chr7	45121798	45121819	+	22	0	4.39987
mmu-miR-5121	chr7	45126925	45126945	-	21	5.42057	3.6133
mmu-miR-7055-5p	chr7	45173303	45173323	+	21	0	0
mmu-miR-7055-3p	chr7	45173339	45173361	+	23	0	0
mmu-miR-7056-5p	chr7	47083203	47083224	-	22	0	0
mmu-miR-7056-3p	chr7	47083166	47083187	-	22	0	0
mmu-miR-6238	chr7	53891796	53891817	-	22	0	0
mmu-miR-6389	chr7	57581070	57581090	+	21	0	0
mmu-miR-344d-3p	chr7	61683127	61683148	-	22	0	0
mmu-miR-344d-1-5p	chr7	61683166	61683189	-	24	0	0
mmu-miR-344d-2-5p	chr7	61685318	61685341	-	24	0	0
mmu-miR-344d-3-5p	chr7	61726296	61726318	-	23	0	0
mmu-miR-344e-5p	chr7	61735579	61735598	-	20	0	0
mmu-miR-344e-3p	chr7	61735539	61735560	-	22	0	0
mmu-miR-344h-5p	chr7	61739390	61739409	-	20	0	0
mmu-miR-344h-3p	chr7	61739350	61739371	-	22	0	0
mmu-miR-344b-5p	chr7	61790556	61790578	-	23	0	0
mmu-miR-344b-3p	chr7	61790522	61790543	-	22	0	0
mmu-miR-344c-5p	chr7	61837363	61837385	-	23	0	0
mmu-miR-344c-3p	chr7	61837323	61837345	-	23	0	0
mmu-miR-344-5p	chr7	61877819	61877844	-	26	0	0
mmu-miR-344-3p	chr7	61877782	61877804	-	23	1.41858	0
mmu-miR-344g-5p	chr7	61982335	61982355	-	21	0	0
mmu-miR-344g-3p	chr7	61982295	61982316	-	22	0	0
mmu-miR-344f-5p	chr7	62046225	62046246	-	22	0	0
mmu-miR-344f-3p	chr7	62046183	62046203	-	21	0	0
mmu-miR-344i	chr7	62085281	62085300	-	20	0	0
mmu-miR-211-5p	chr7	64205831	64205852	+	22	2.58968	3.38731
mmu-miR-211-3p	chr7	64205868	64205888	+	21	0	0
mmu-miR-6416-5p	chr7	64250077	64250097	-	21	0	0
mmu-miR-6416-3p	chr7	64249989	64250009	-	21	0	0
mmu-miR-7057-5p	chr7	66381702	66381719	-	18	0	0
mmu-miR-7057-3p	chr7	66381669	66381690	-	22	0	0
mmu-miR-7234-5p	chr7	73819590	73819612	+	23	0	0
mmu-miR-7234-3p	chr7	73819619	73819641	+	23	0	0
mmu-miR-7a-2-3p	chr7	78888335	78888356	+	22	0	1.75099
mmu-miR-1839-5p	chr7	81529919	81529940	+	22	7.33654	6.96821
mmu-miR-1839-3p	chr7	81529958	81529980	+	23	0	0.670366
mmu-miR-708-5p	chr7	96249450	96249472	+	23	7.84694	7.64622
mmu-miR-708-3p	chr7	96249496	96249517	+	22	9.44167	10.0869
mmu-miR-6394	chr7	96305740	96305760	+	21	0	0
mmu-miR-326-5p	chr7	99552288	99552311	+	24	0	0
mmu-miR-326-3p	chr7	99552328	99552348	+	21	5.47585	1.75099
mmu-miR-3102-5p	chr7	100882388	100882409	-	22	2.94352	0
mmu-miR-3102-5p.2-5p	chr7	100882367	100882387	-	21	1.41858	4.93422
mmu-miR-3102-3p.2-3p	chr7	100882330	100882350	-	21	1.41858	3.21423
mmu-miR-3102-3p	chr7	100882307	100882329	-	23	5.36308	4.03372
mmu-miR-139-5p	chr7	101475382	101475403	+	22	0	4.03372
mmu-miR-139-3p	chr7	101475418	101475439	+	22	0	0
mmu-miR-7058-5p	chr7	126368013	126368036	-	24	0	0
mmu-miR-7058-3p	chr7	126367971	126367992	-	22	0	0
mmu-miR-7059-5p	chr7	126579506	126579527	-	22	2.11983	0
mmu-miR-7059-3p	chr7	126579474	126579495	-	22	0	0
mmu-miR-7060-5p	chr7	127489251	127489272	+	22	0	0
mmu-miR-7060-3p	chr7	127489367	127489387	+	21	0	0
mmu-miR-762	chr7	127708534	127708555	+	22	0	0
mmu-miR-3103-5p	chr7	128288414	128288434	-	21	0	2.90809
mmu-miR-3103-3p	chr7	128288370	128288391	-	22	1.41858	0
mmu-miR-7061-5p	chr7	130908273	130908294	+	22	0	0
mmu-miR-7061-3p	chr7	130908314	130908335	+	22	0	0
mmu-miR-1962	chr7	135566234	135566255	+	22	0	0
mmu-miR-6401	chr7	139779085	139779106	+	22	0	0
mmu-miR-7686-5p	chr7	139957598	139957622	-	25	0	0
mmu-miR-7686-3p	chr7	139957566	139957587	-	22	0	0
mmu-miR-202-5p	chr7	139957732	139957752	-	21	0	0
mmu-miR-202-3p	chr7	139957695	139957716	-	22	0	0
mmu-miR-7062-5p	chr7	139986846	139986869	-	24	0	0
mmu-miR-7062-3p	chr7	139986809	139986831	-	23	0	0
mmu-miR-210-5p	chr7	141221445	141221466	-	22	7.12802	7.4007
mmu-miR-210-3p	chr7	141221407	141221428	-	22	8.54092	8.19278
mmu-miR-7063-5p	chr7	141620706	141620728	+	23	0	0
mmu-miR-7063-3p	chr7	141620772	141620791	+	20	0	0
mmu-miR-3104-5p	chr7	141992180	141992204	+	25	0	0
mmu-miR-3104-3p	chr7	141992218	141992240	+	23	0	0
mmu-miR-675-5p	chr7	142577112	142577133	-	22	0	0
mmu-miR-675-3p	chr7	142577078	142577099	-	22	0	0
mmu-miR-483-5p	chr7	142654968	142654989	-	22	0	0
mmu-miR-483-3p	chr7	142654932	142654952	-	21	4.1483	0
mmu-miR-7064-5p	chr7	143570731	143570754	-	24	0	0
mmu-miR-7064-3p	chr7	143570673	143570693	-	21	0	0
mmu-miR-6404	chr7	143933171	143933191	+	21	0	0
mmu-miR-3105-5p	chr7	144009267	144009288	+	22	0	0
mmu-miR-3105-3p	chr7	144009304	144009325	+	22	3.22745	0
mmu-miR-7654-5p	chr8	8690141	8690162	-	22	0	0
mmu-miR-7654-3p	chr8	8690093	8690114	-	22	0	0
mmu-miR-7238-5p	chr8	11635719	11635736	-	18	3.46458	0.670366
mmu-miR-7238-3p	chr8	11635694	11635708	-	15	0	0
mmu-miR-9768-5p	chr8	12947953	12947975	+	23	0	0
mmu-miR-9768-3p	chr8	12948035	12948058	+	24	0	0
mmu-miR-7065-5p	chr8	13136077	13136097	+	21	0	0
mmu-miR-7065-3p	chr8	13136112	13136132	+	21	0	0
mmu-miR-1968-5p	chr8	13189068	13189091	-	24	5.81292	7.12314
mmu-miR-1968-3p	chr8	13189035	13189055	-	21	0	0
mmu-miR-3106-5p	chr8	16168805	16168825	-	21	0	0
mmu-miR-3106-3p	chr8	16168768	16168789	-	22	0	0
mmu-miR-486a-5p	chr8	23142587	23142608	+	22	7.12802	6.77136
mmu-miR-486a-3p	chr8	23142629	23142649	+	21	3.46458	1.12628
mmu-miR-486b-5p	chr8	23142627	23142648	-	22	7.24403	6.7869
mmu-miR-486b-3p	chr8	23142587	23142606	-	20	0	0
mmu-miR-8108	chr8	25159150	25159171	-	22	0	0
mmu-miR-6395	chr8	34166689	34166710	-	22	3.46458	0.670366
mmu-miR-383-5p	chr8	38252178	38252199	-	22	0	0
mmu-miR-383-3p	chr8	38252138	38252158	-	21	0	0
mmu-miR-7666-5p	chr8	40307908	40307929	-	22	0	0
mmu-miR-7666-3p	chr8	40307875	40307893	-	19	0	0
mmu-miR-710	chr8	64514401	64514422	-	22	0	0
mmu-miR-7066-5p	chr8	70102560	70102581	-	22	0	0
mmu-miR-7066-3p	chr8	70102524	70102546	-	23	0	0
mmu-miR-7240-5p	chr8	70798135	70798155	+	21	0	0
mmu-miR-7240-3p	chr8	70798172	70798192	+	21	0	0
mmu-miR-7067-5p	chr8	70895543	70895565	-	23	0	0
mmu-miR-7067-3p	chr8	70895508	70895528	-	21	0	0
mmu-miR-1969	chr8	70925541	70925563	+	23	0	0
mmu-miR-6769b-5p	chr8	71631083	71631102	-	20	0	0
mmu-miR-6769b-3p	chr8	71631047	71631067	-	21	0	0
mmu-miR-7068-5p	chr8	72470069	72470089	-	21	0	0
mmu-miR-7068-3p	chr8	72470016	72470036	-	21	4.61029	5.18937
mmu-miR-28b	chr8	73016523	73016543	+	21	1.41858	0
mmu-miR-1668	chr8	83723903	83723923	-	21	0	0
mmu-miR-8111	chr8	84005704	84005724	+	21	0	0
mmu-miR-1199-5p	chr8	84011594	84011613	-	20	5.03524	6.01969
mmu-miR-1199-3p	chr8	84011549	84011569	-	21	0	0
mmu-miR-709	chr8	84086167	84086185	+	19	0	0
mmu-miR-181d-5p	chr8	84178759	84178781	-	23	11.5163	11.716
mmu-miR-181d-3p	chr8	84178720	84178740	-	21	0	0
mmu-miR-181c-5p	chr8	84178924	84178945	-	22	12.5934	12.6227
mmu-miR-181c-3p	chr8	84178885	84178906	-	22	9.26853	11.3599
mmu-miR-23a-5p	chr8	84208527	84208548	+	22	0	0
mmu-miR-23a-3p	chr8	84208563	84208583	+	21	7.16213	9.01667
mmu-miR-27a-5p	chr8	84208685	84208706	+	22	4.87994	4.51631
mmu-miR-27a-3p	chr8	84208727	84208747	+	21	9.38864	9.66833
mmu-miR-24-2-5p	chr8	84208839	84208860	+	22	6.73353	5.30181
mmu-miR-3074-2-3p	chr8	84208839	84208858	-	20	0	0
mmu-miR-7069-5p	chr8	84867952	84867974	+	23	0	0
mmu-miR-7069-3p	chr8	84867987	84868007	+	21	0	0
mmu-miR-7070-5p	chr8	85062086	85062106	+	21	0	0
mmu-miR-7070-3p	chr8	85062152	85062171	+	20	0	0
mmu-miR-8109	chr8	85700935	85700955	+	21	0	0.670366
mmu-miR-7071-5p	chr8	88138211	88138233	+	23	0	0
mmu-miR-7071-3p	chr8	88138254	88138274	+	21	0	1.98455
mmu-miR-8110	chr8	89024791	89024811	+	21	0	0
mmu-miR-138-5p	chr8	94324312	94324334	+	23	6.6154	7.30682
mmu-miR-138-2-3p	chr8	94324359	94324379	+	21	0	0
mmu-miR-7072-5p	chr8	94505051	94505072	+	22	0	0
mmu-miR-7072-3p	chr8	94505085	94505105	+	21	0	0
mmu-miR-7073-5p	chr8	95753188	95753209	-	22	0	0
mmu-miR-7073-3p	chr8	95753151	95753172	-	22	0	0
mmu-miR-328-5p	chr8	105308419	105308440	-	22	0	0
mmu-miR-328-3p	chr8	105308379	105308400	-	22	8.39796	7.79579
mmu-miR-1966-5p	chr8	105615481	105615505	+	25	0	0
mmu-miR-1966-3p	chr8	105615521	105615543	+	23	0	0
mmu-miR-7074-5p	chr8	105951672	105951694	-	23	0	0
mmu-miR-7074-3p	chr8	105951637	105951659	-	23	0	0
mmu-miR-7075-5p	chr8	107096081	107096101	-	21	0	0
mmu-miR-7075-3p	chr8	107096025	107096045	-	21	3.66818	2.90809
mmu-miR-140-5p	chr8	107551249	107551270	+	22	4.00531	5.09266
mmu-miR-140-3p	chr8	107551288	107551308	+	21	10.2175	9.44168
mmu-miR-3108-5p	chr8	108936870	108936892	+	23	0	0
mmu-miR-3108-3p	chr8	108936911	108936931	+	21	0	0
mmu-miR-3473d	chr8	111016498	111016521	-	24	7.65669	8.31838
mmu-miR-1957b	chr8	111450230	111450250	+	21	0	0
mmu-miR-7076-5p	chr8	111689649	111689669	-	21	0	0
mmu-miR-7076-3p	chr8	111689601	111689621	-	21	0	0
mmu-miR-7077-5p	chr8	117453025	117453045	+	21	0	0
mmu-miR-7077-3p	chr8	117453060	117453079	+	20	0	0
mmu-miR-7078-5p	chr8	117459270	117459289	+	20	0	0
mmu-miR-7078-3p	chr8	117459308	117459328	+	21	0	0
mmu-miR-7687-5p	chr8	120538696	120538720	+	25	2.11983	4.2732
mmu-miR-7687-3p	chr8	120538734	120538754	+	21	0	0
mmu-miR-7237-5p	chr8	121978024	121978047	+	24	0	0
mmu-miR-7237-3p	chr8	121978065	121978086	+	22	0	0
mmu-miR-6396	chr8	122622265	122622288	-	24	0	0
mmu-miR-7079-5p	chr8	123104980	123105001	+	22	1.41858	0
mmu-miR-7079-3p	chr8	123105023	123105043	+	21	4.00531	3.38731
mmu-miR-7080-5p	chr8	123130106	123130128	+	23	0	0
mmu-miR-7080-3p	chr8	123130147	123130168	+	22	0	0
mmu-miR-1967	chr8	124022688	124022710	+	23	3.84657	0
mmu-miR-21c	chr8	128278188	128278208	-	21	1.41858	0
mmu-miR-1903	chr8	128359251	128359272	+	22	0	0
mmu-miR-101c	chr9	3038680	3038698	-	19	5.63004	4.18212
mmu-miR-5618-5p	chr9	7784390	7784409	+	20	0	0
mmu-miR-5618-3p	chr9	7784423	7784440	+	18	0	0
mmu-miR-1899	chr9	8246796	8246817	+	22	0	0
mmu-miR-6237	chr9	9894484	9894506	+	23	0	0
mmu-miR-7650-5p	chr9	15312611	15312632	+	22	0	0
mmu-miR-7650-3p	chr9	15312648	15312669	+	22	0	0
mmu-miR-7081-5p	chr9	20914134	20914159	-	26	0	0
mmu-miR-7081-3p	chr9	20914091	20914112	-	22	0	0
mmu-miR-1900	chr9	21032261	21032282	-	22	0	0
mmu-miR-7082-5p	chr9	21075563	21075583	-	21	0	0
mmu-miR-7082-3p	chr9	21075499	21075520	-	22	4.61029	3.11922
mmu-miR-1946b	chr9	21613452	21613477	-	26	0	0
mmu-miR-7083-5p	chr9	21809975	21809995	-	21	1.41858	3.92557
mmu-miR-7083-3p	chr9	21809941	21809960	-	20	3.22745	0
mmu-miR-7084-5p	chr9	22113988	22114008	-	21	0	0
mmu-miR-7084-3p	chr9	22113951	22113972	-	22	0	0
mmu-miR-100-5p	chr9	41531437	41531458	+	22	3.66818	4.22838
mmu-miR-100-3p	chr9	41531471	41531492	+	22	0	0
mmu-let-7a-2-3p	chr9	41536777	41536797	+	21	0	0
mmu-miR-125b-1-3p	chr9	41581980	41582001	+	22	0	0
mmu-miR-7085-5p	chr9	44400428	44400449	+	22	0	0
mmu-miR-7085-3p	chr9	44400465	44400486	+	22	0	0
mmu-miR-7086-5p	chr9	45266682	45266702	-	21	0	0
mmu-miR-7086-3p	chr9	45266643	45266663	-	21	0	0
mmu-miR-7087-5p	chr9	45939565	45939585	-	21	0	0
mmu-miR-7087-3p	chr9	45939521	45939542	-	22	0	0
mmu-miR-34c-5p	chr9	51103076	51103098	-	23	9.44514	9.32146
mmu-miR-34c-3p	chr9	51103044	51103065	-	22	0	0
mmu-miR-34b-5p	chr9	51103610	51103632	-	23	0	4.2732
mmu-miR-34b-3p	chr9	51103574	51103595	-	22	2.11983	2.90809
mmu-miR-6244	chr9	52115653	52115673	+	21	0	0
mmu-miR-130c	chr9	53400808	53400829	-	22	0	0.670366
mmu-miR-5710	chr9	54708317	54708338	+	22	0	0
mmu-miR-6385	chr9	58221155	58221175	+	21	0	0
mmu-miR-5133	chr9	62122565	62122585	-	21	0	0
mmu-miR-190a-5p	chr9	67236700	67236721	-	22	4.27839	4.72429
mmu-miR-190a-3p	chr9	67236664	67236685	-	22	0	0
mmu-miR-7241-5p	chr9	67727758	67727780	-	23	0	0
mmu-miR-7241-3p	chr9	67727717	67727738	-	22	0	0
mmu-miR-7242-5p	chr9	67729556	67729577	-	22	0	0
mmu-miR-7242-3p	chr9	67729499	67729520	-	22	0	0
mmu-miR-3109-5p	chr9	69456958	69456981	+	24	0	0
mmu-miR-3109-3p	chr9	69456997	69457017	+	21	0	0
mmu-miR-5626-5p	chr9	70405732	70405753	-	22	0	0
mmu-miR-5626-3p	chr9	70405694	70405715	-	22	2.11983	0
mmu-miR-184-3p	chr9	89802263	89802284	-	22	5.81292	0
mmu-miR-184-5p	chr9	89802302	89802323	-	22	0	0
mmu-miR-6386	chr9	92267334	92267357	-	24	0	0
mmu-miR-7656-5p	chr9	94751829	94751850	+	22	0	0
mmu-miR-7656-3p	chr9	94751869	94751890	+	22	0	0
mmu-miR-7243-5p	chr9	102304956	102304975	-	20	0	0
mmu-miR-7243-3p	chr9	102304924	102304943	-	20	0	0
mmu-miR-2136	chr9	104426163	104426183	+	21	0	0
mmu-miR-135a-1-3p	chr9	106154179	106154200	+	22	0	0
mmu-let-7g-5p	chr9	106178846	106178867	+	22	7.09308	6.63205
mmu-let-7g-3p	chr9	106178902	106178923	+	22	0	0
mmu-miR-7088-5p	chr9	108081498	108081522	+	25	0	0
mmu-miR-7088-3p	chr9	108081560	108081581	+	22	0	0
mmu-miR-191-5p	chr9	108568325	108568347	+	23	13.7705	14.304
mmu-miR-191-3p	chr9	108568367	108568388	+	22	4.61029	4.13433
mmu-miR-425-5p	chr9	108568789	108568811	+	23	9.55512	8.90184
mmu-miR-425-3p	chr9	108568830	108568850	+	21	4.87994	7.04775
mmu-miR-711	chr9	108969970	108969991	+	22	0	0
mmu-miR-7089-5p	chr9	109889648	109889671	+	24	0	0
mmu-miR-7089-3p	chr9	109889689	109889710	+	22	0	0
mmu-miR-6236	chr9	110281353	110281371	+	19	0	0
mmu-miR-8107	chr9	110636065	110636085	-	21	0	0
mmu-miR-128-2-5p	chr9	112118679	112118701	-	23	0	0
mmu-miR-467h	chr9	115381898	115381919	+	22	0	1.12628
mmu-miR-26a-1-3p	chr9	119031850	119031871	+	22	0	0
mmu-miR-7090-5p	chr9	120955089	120955111	+	23	0	0
mmu-miR-7090-3p	chr9	120955128	120955147	+	20	0	0
mmu-miR-8106	chr9	122273930	122273951	-	22	0	0
mmu-miR-138-1-3p	chr9	122682936	122682957	+	22	2.11983	0
mmu-miR-500-5p	chrX	7237730	7237754	-	25	0	0
mmu-miR-500-3p	chrX	7237695	7237716	-	22	3.22745	0
mmu-miR-501-5p	chrX	7241307	7241328	-	22	3.22745	3.98066
mmu-miR-501-3p	chrX	7241270	7241291	-	22	5.72437	5.1658
mmu-miR-362-5p	chrX	7242019	7242042	-	24	1.41858	0
mmu-miR-362-3p	chrX	7241984	7242005	-	22	3.22745	4.18212
mmu-miR-188-5p	chrX	7248031	7248051	-	21	6.34544	5.6802
mmu-miR-188-3p	chrX	7247992	7248012	-	21	0	0
mmu-miR-532-5p	chrX	7248456	7248477	-	22	8.44721	8.19569
mmu-miR-532-3p	chrX	7248419	7248440	-	22	2.11983	4.8773
mmu-miR-1198-5p	chrX	7807142	7807163	+	22	6.73353	6.55247
mmu-miR-1198-3p	chrX	7807180	7807201	+	22	0	0.670366
mmu-miR-221-5p	chrX	19146344	19146369	-	26	0	0
mmu-miR-221-3p	chrX	19146307	19146329	-	23	6.01307	6.12125
mmu-miR-222-5p	chrX	19146940	19146960	-	21	0	4.65824
mmu-miR-222-3p	chrX	19146903	19146923	-	21	8.08779	9.00841
mmu-miR-5617-5p	chrX	20863160	20863182	-	23	0	0
mmu-miR-5617-3p	chrX	20863126	20863146	-	21	0	0
mmu-miR-3110-5p	chrX	38210453	38210473	+	21	0	0
mmu-miR-3110-3p	chrX	38210488	38210509	+	22	2.58968	0
mmu-miR-6384	chrX	52378155	52378174	-	20	0	0
mmu-miR-717	chrX	52422461	52422482	-	22	0	0
mmu-miR-363-5p	chrX	52741740	52741761	-	22	6.92448	7.11701
mmu-miR-363-3p	chrX	52741697	52741718	-	22	11.7023	11.01
mmu-miR-92a-2-5p	chrX	52741892	52741913	-	22	3.22745	4.98899
mmu-miR-19b-2-5p	chrX	52742033	52742056	-	24	0	3.11922
mmu-miR-20b-5p	chrX	52742159	52742181	-	23	9.1714	8.97319
mmu-miR-20b-3p	chrX	52742122	52742143	-	22	6.04997	5.55873
mmu-miR-18b-5p	chrX	52742381	52742403	-	23	8.7516	9.01337
mmu-miR-18b-3p	chrX	52742342	52742363	-	22	5.03524	1.47219
mmu-miR-106a-5p	chrX	52742541	52742563	-	23	8.83326	8.86936
mmu-miR-106a-3p	chrX	52742505	52742527	-	23	0	0
mmu-miR-450b-5p	chrX	53048044	53048065	-	22	9.12891	8.88749
mmu-miR-450b-3p	chrX	53048008	53048029	-	22	0	2.66067
mmu-miR-450a-5p	chrX	53048206	53048227	-	22	7.07529	6.96137
mmu-miR-450a-1-3p	chrX	53048171	53048192	-	22	0	0
mmu-miR-450a-2-3p	chrX	53048304	53048325	-	22	0	0
mmu-miR-542-5p	chrX	53049453	53049474	-	22	4.00531	0.670366
mmu-miR-542-3p	chrX	53049415	53049436	-	22	6.15533	6.84
mmu-miR-351-5p	chrX	53053315	53053338	-	24	9.93639	10.4541
mmu-miR-351-3p	chrX	53053276	53053296	-	21	0	0
mmu-miR-503-5p	chrX	53054027	53054049	-	23	2.58968	0
mmu-miR-503-3p	chrX	53053987	53054008	-	22	0	0
mmu-miR-322-5p	chrX	53054306	53054327	-	22	7.33654	7.64195
mmu-miR-322-3p	chrX	53054269	53054289	-	21	5.72437	6.3159
mmu-miR-5116	chrX	56587892	56587912	-	21	0	0
mmu-miR-504-5p	chrX	59097705	59097726	-	22	0	3.46664
mmu-miR-504-3p	chrX	59097669	59097690	-	22	0	0
mmu-miR-505-5p	chrX	60394451	60394473	-	23	1.41858	0
mmu-miR-505-3p	chrX	60394416	60394437	-	22	0	4.18212
mmu-miR-743a-5p	chrX	66776794	66776815	-	22	0	0
mmu-miR-743a-3p	chrX	66776760	66776781	-	22	0	1.12628
mmu-miR-743b-5p	chrX	66777302	66777322	-	21	0	0
mmu-miR-743b-3p	chrX	66777266	66777287	-	22	4.39771	4.81803
mmu-miR-742-5p	chrX	66780412	66780432	-	21	0	0
mmu-miR-742-3p	chrX	66780376	66780397	-	22	0	0
mmu-miR-883a-5p	chrX	66780803	66780824	-	22	0	0
mmu-miR-883a-3p	chrX	66780768	66780789	-	22	3.22745	0
mmu-miR-883b-5p	chrX	66789936	66789957	-	22	0	0
mmu-miR-883b-3p	chrX	66789900	66789921	-	22	0	0
mmu-miR-471-5p	chrX	66792634	66792655	-	22	0	0
mmu-miR-471-3p	chrX	66792599	66792620	-	22	0	0
mmu-miR-741-5p	chrX	66796847	66796869	-	23	0	0
mmu-miR-741-3p	chrX	66796809	66796831	-	23	1.41858	0
mmu-miR-463-5p	chrX	66799273	66799294	-	22	1.41858	4.39987
mmu-miR-463-3p	chrX	66799236	66799257	-	22	0	0
mmu-miR-880-5p	chrX	66800577	66800597	-	21	0	0
mmu-miR-880-3p	chrX	66800540	66800561	-	22	0	0
mmu-miR-878-5p	chrX	66801554	66801575	-	22	3.46458	0
mmu-miR-878-3p	chrX	66801518	66801539	-	22	0	0
mmu-miR-881-5p	chrX	66801986	66802007	-	22	0	3.11922
mmu-miR-881-3p	chrX	66801954	66801975	-	22	3.84657	3.80864
mmu-miR-871-5p	chrX	66810472	66810494	-	23	2.11983	3.80864
mmu-miR-871-3p	chrX	66810438	66810460	-	23	5.93631	3.6133
mmu-miR-470-5p	chrX	66813995	66814017	-	23	5.72437	5.8377
mmu-miR-470-3p	chrX	66813961	66813982	-	22	0	0
mmu-miR-465d-5p	chrX	66822691	66822713	-	23	0	0
mmu-miR-465d-3p	chrX	66822656	66822677	-	22	0	0
mmu-miR-465c-5p	chrX	66826004	66826025	-	22	5.76932	5.8377
mmu-miR-465c-3p	chrX	66825965	66825986	-	22	6.12106	3.74642
mmu-miR-465b-5p	chrX	66829249	66829270	-	22	3.22745	3.98066
mmu-miR-465b-3p	chrX	66829212	66829233	-	22	6.12106	3.74642
mmu-miR-465a-5p	chrX	66839099	66839121	-	23	1.41858	0
mmu-miR-465a-3p	chrX	66839063	66839084	-	22	6.12106	3.74642
mmu-miR-201-5p	chrX	67988135	67988156	-	22	0	0
mmu-miR-201-3p	chrX	67988099	67988121	-	23	0	0
mmu-miR-547-5p	chrX	67988420	67988440	-	21	0	0
mmu-miR-547-3p	chrX	67988383	67988403	-	21	0	0
mmu-miR-509-5p	chrX	68010149	68010170	-	22	0	0
mmu-miR-509-3p	chrX	68010115	68010135	-	21	0	0
mmu-miR-224-5p	chrX	72261085	72261105	-	21	5.72437	0
mmu-miR-224-3p	chrX	72261037	72261058	-	22	0	0
mmu-miR-452-5p	chrX	72262271	72262292	-	22	0	3.74642
mmu-miR-452-3p	chrX	72262235	72262256	-	22	0	0
mmu-miR-767	chrX	72590050	72590070	-	21	0	0
mmu-miR-105	chrX	72591547	72591569	-	23	0	0
mmu-miR-2137	chrX	72992113	72992133	+	21	0	0
mmu-miR-5132-5p	chrX	74023571	74023591	-	21	0	0
mmu-miR-5132-3p	chrX	74023534	74023554	-	21	0	0
mmu-miR-718	chrX	74023857	74023877	-	21	0	0
mmu-miR-7091-5p	chrX	74274083	74274105	-	23	4.39771	0.670366
mmu-miR-7091-3p	chrX	74274027	74274047	-	21	0	0
mmu-miR-7092-5p	chrX	74317367	74317389	+	23	0	0
mmu-miR-7092-3p	chrX	74317406	74317429	+	24	0	0
mmu-miR-7673-5p	chrX	94274574	94274595	+	22	0	0
mmu-miR-7673-3p	chrX	94274615	94274637	+	23	0	0
mmu-miR-223-5p	chrX	96242842	96242864	+	23	0	0
mmu-miR-223-3p	chrX	96242884	96242905	+	22	0	2.66067
mmu-miR-676-5p	chrX	100381114	100381135	+	22	5.63004	5.80754
mmu-miR-676-3p	chrX	100381151	100381171	+	21	7.95789	9.30132
mmu-miR-421-5p	chrX	103572966	103572986	-	21	0	1.98455
mmu-miR-421-3p	chrX	103572930	103572952	-	23	9.73584	10.0647
mmu-miR-374b-5p	chrX	103573112	103573133	-	22	4.70588	1.47219
mmu-miR-374b-3p	chrX	103573075	103573096	-	22	0	0
mmu-miR-374c-5p	chrX	103573086	103573105	+	20	2.11983	0
mmu-miR-374c-3p	chrX	103573113	103573131	+	19	0	0.670366
mmu-miR-672-5p	chrX	104116228	104116250	-	23	10.2256	10.2811
mmu-miR-672-3p	chrX	104116192	104116212	-	21	4.79553	3.38731
mmu-miR-384-5p	chrX	105344332	105344354	-	23	0	0
mmu-miR-384-3p	chrX	105344292	105344313	-	22	0	0
mmu-miR-325-5p	chrX	105379142	105379164	-	23	0	0
mmu-miR-325-3p	chrX	105379105	105379126	-	22	0	0
mmu-miR-6382	chrX	106309909	106309932	+	24	0	0
mmu-miR-361-5p	chrX	113074867	113074888	-	22	7.82582	8.27221
mmu-miR-361-3p	chrX	113074827	113074851	-	25	6.75604	6.84
mmu-miR-3112-5p	chrX	134075330	134075350	+	21	0	0
mmu-miR-3112-3p	chrX	134075366	134075386	+	21	0	0
mmu-miR-7093-5p	chrX	134757636	134757657	+	22	0	0
mmu-miR-7093-3p	chrX	134757711	134757731	+	21	0	0
mmu-miR-7646-5p	chrX	135746716	135746737	+	22	0	0
mmu-miR-7646-3p	chrX	135746749	135746769	+	21	0	0
mmu-miR-1970	chrX	135786174	135786196	-	23	0	0
mmu-miR-6383	chrX	136183262	136183282	+	21	0	0
mmu-miR-3475-3p	chrX	140310992	140311012	+	21	4.1483	5.2354
mmu-miR-3475-5p	chrX	140310949	140310970	+	22	0	0
mmu-miR-652-5p	chrX	142739020	142739043	+	24	0	0.670366
mmu-miR-652-3p	chrX	142739060	142739080	+	21	4.1483	4.69165
mmu-miR-3472	chrX	145039390	145039414	+	25	0	0
mmu-miR-3552	chrX	146999424	146999444	+	21	0	0
mmu-miR-764-5p	chrX	147002285	147002303	+	19	0	0
mmu-miR-764-3p	chrX	147002324	147002345	+	22	0	0
mmu-miR-1912-5p	chrX	147009456	147009477	+	22	0	0
mmu-miR-1912-3p	chrX	147009493	147009514	+	22	0	0
mmu-miR-1264-5p	chrX	147010614	147010635	+	22	0	0
mmu-miR-1264-3p	chrX	147010655	147010676	+	22	0	0
mmu-miR-1298-5p	chrX	147064918	147064939	+	22	0	0
mmu-miR-1298-3p	chrX	147064970	147064991	+	22	0	0
mmu-miR-448-5p	chrX	147158221	147158242	+	22	0	0
mmu-miR-448-3p	chrX	147158281	147158302	+	22	0	0
mmu-miR-3620-5p	chrX	150547424	150547445	-	22	0	0
mmu-miR-3620-3p	chrX	150547385	150547406	-	22	0	0
mmu-miR-3113-5p	chrX	151859575	151859596	+	22	0	0
mmu-miR-3113-3p	chrX	151859606	151859625	+	20	0	0
mmu-let-7f-2-3p	chrX	151912403	151912423	+	21	0	0
mmu-miR-98-5p	chrX	151913229	151913250	+	22	3.66818	0.670366
mmu-miR-98-3p	chrX	151913287	151913308	+	22	0	0
mmu-miR-3473a	chrX	162874920	162874937	-	18	0	0

## Sheet: RIP AGO1 up
Table S2: RIP-seq log2+1 of CPM values in Input WT and AGO1 RIP. Table highlighting miRNAs that are strongly loaded in AGO1 compared to Input. The top 20% AGO1 RIP/Input were selected and all values equal 0 were excluded from the calculation. Related to Fig S4F.
Geneid	Chr	Start	End	Strand	Length	Input_E14	RIP_E14_AGO1	RIP/Input	Top 20% RIP/Input (excluded 0 values)
mmu-miR-669g	chr2	10477170	10477192	+	23	1.41858	5.06743	3.57219
mmu-miR-3102-5p.2-5p	chr7	100882367	100882387	-	21	1.41858	4.93422	3.47829
mmu-miR-212-3p	chr11	75173443	75173464	+	22	1.41858	4.58902	3.23494
mmu-miR-463-5p	chrX	66799273	66799294	-	22	1.41858	4.39987	3.1016
mmu-miR-7083-5p	chr9	21809975	21809995	-	21	1.41858	3.92557	2.76725
mmu-miR-466m-3p	chr2	10466713	10466734	+	22	1.41858	3.6814	2.59513
mmu-miR-134-3p	chr12	109734184	109734203	+	20	1.41858	3.6133	2.54713
mmu-miR-7015-3p	chr4	120973259	120973279	-	21	1.41858	3.54183	2.49675
mmu-miR-467c-3p	chr2	10473977	10473998	+	22	1.41858	3.38731	2.38782
mmu-miR-760-3p	chr3	122293615	122293634	-	20	2.94352	6.98177	2.37191
mmu-miR-532-3p	chrX	7248419	7248440	-	22	2.11983	4.8773	2.30079
mmu-miR-141-5p	chr6	124717959	124717980	-	22	2.58968	5.92455	2.28775
mmu-miR-132-3p	chr11	75173723	75173744	+	22	1.41858	3.21423	2.26581
mmu-miR-3102-3p.2-3p	chr7	100882330	100882350	-	21	1.41858	3.21423	2.26581
mmu-miR-3098-3p	chr6	125195845	125195865	+	21	2.11983	4.43973	2.09438
mmu-miR-7687-5p	chr8	120538696	120538720	+	25	2.11983	4.2732	2.01582
mmu-miR-185-3p	chr16	18327405	18327425	-	21	2.11983	4.13433	1.95031
mmu-miR-330-3p	chr7	19181525	19181547	+	23	2.94352	5.57672	1.89457
mmu-miR-1934-3p	chr11	69663092	69663113	+	22	2.11983	3.86829	1.82481
mmu-miR-871-5p	chrX	66810472	66810494	-	23	2.11983	3.80864	1.79667
mmu-miR-539-3p	chr12	109728176	109728197	+	22	2.11983	3.6814	1.73664
mmu-miR-1933-3p	chr11	21344600	21344621	-	22	2.94352	4.98899	1.6949
mmu-miR-92b-5p	chr3	89227165	89227188	-	24	3.22745	5.30181	1.64272
mmu-miR-341-5p	chr12	109611521	109611541	+	21	3.22745	5.2354	1.62215
mmu-miR-1981-3p	chr1	184822409	184822429	-	21	4.1483	6.72371	1.62084
mmu-miR-653-5p	chr6	3721355	3721375	-	21	3.46458	5.54051	1.59919
mmu-miR-32-3p	chr4	56895232	56895252	-	21	3.22745	5.14183	1.59316
mmu-miR-92a-2-5p	chrX	52741892	52741913	-	22	3.22745	4.98899	1.5458
mmu-miR-5106	chr4	44221197	44221219	-	23	1.41858	2.1855	1.54063
mmu-miR-669h-5p	chr2	10518174	10518197	+	24	2.58968	3.98066	1.53712
mmu-miR-301a-5p	chr11	87113017	87113038	+	22	3.22745	4.90604	1.5201
mmu-miR-367-3p	chr3	127545779	127545800	+	22	2.58968	3.74642	1.44667
mmu-miR-425-3p	chr9	108568830	108568850	+	21	4.87994	7.04775	1.44423
mmu-miR-664-5p	chr1	185242975	185242995	+	21	4.27839	6.15756	1.43922
mmu-miR-5113	chr15	80940049	80940071	+	23	3.46458	4.93422	1.42419
mmu-miR-187-3p	chr18	24429110	24429131	-	22	4.61029	6.45856	1.4009
mmu-miR-6952-3p	chr15	76064828	76064849	-	22	3.66818	5.11745	1.39509
mmu-miR-1945	chr16	11254381	11254402	-	22	2.94352	4.0849	1.38776
mmu-miR-34b-3p	chr9	51103574	51103595	-	22	2.11983	2.90809	1.37185
mmu-miR-19a-5p	chr14	115044012	115044033	+	22	4.00531	5.46525	1.3645
mmu-miR-1843b-5p	chr1	159340362	159340382	+	21	3.46458	4.72429	1.3636
mmu-miR-1843a-5p	chr12	80391654	80391674	-	21	3.46458	4.72429	1.3636
mmu-miR-5108	chr10	61774795	61774813	+	19	3.46458	4.72429	1.3636
mmu-miR-702-5p	chr5	136991442	136991462	+	21	3.84657	5.18937	1.34909
mmu-miR-299a-3p	chr12	109710676	109710697	+	22	7.24403	9.75186	1.34619
mmu-miR-1943-5p	chr15	79375271	79375293	-	23	4.50791	6.03278	1.33827
mmu-miR-301b-5p	chr16	17124456	17124477	-	22	4.27839	5.64652	1.31978
mmu-miR-493-5p	chr12	109580243	109580261	+	19	4.87994	6.43903	1.31949
mmu-miR-1306-3p	chr16	18284248	18284268	-	21	2.11983	2.78968	1.31599
mmu-miR-8114	chr1	153899989	153900009	+	21	2.94352	3.86829	1.31417
mmu-miR-297b-5p	chr2	10511686	10511707	+	22	3.22745	4.22838	1.31013
mmu-miR-211-5p	chr7	64205831	64205852	+	22	2.58968	3.38731	1.308
mmu-miR-598-3p	chr14	63727236	63727257	+	22	3.66818	4.75622	1.29662
mmu-miR-362-3p	chrX	7241984	7242005	-	22	3.22745	4.18212	1.2958
mmu-miR-5119	chr11	98262638	98262656	+	19	5.36308	6.90553	1.28761
mmu-miR-128-1-5p	chr1	128202369	128202389	+	21	4.70588	6.03278	1.28197
mmu-miR-140-5p	chr8	107551249	107551270	+	22	4.00531	5.09266	1.27148
mmu-miR-16-1-3p	chr14	61631894	61631915	-	22	3.46458	4.39987	1.26996
mmu-miR-3473g	chr2	126902290	126902309	-	20	3.46458	4.39987	1.26996
mmu-miR-3475-3p	chrX	140310992	140311012	+	21	4.1483	5.2354	1.26206
mmu-miR-28a-3p	chr16	24827908	24827929	+	22	6.28481	7.91726	1.25974
mmu-miR-23a-3p	chr8	84208563	84208583	+	21	7.16213	9.01667	1.25894
mmu-miR-195a-3p	chr11	70235100	70235121	+	22	5.03524	6.30515	1.2522
mmu-miR-340-3p	chr11	50069762	50069783	+	22	4.39771	5.4458	1.23833
mmu-miR-10a-5p	chr11	96317186	96317208	+	23	6.12106	7.57192	1.23703
mmu-miR-33-3p	chr15	82198167	82198188	+	22	1.41858	1.75099	1.23433
mmu-miR-465b-5p	chrX	66829249	66829270	-	22	3.22745	3.98066	1.23338
mmu-miR-501-5p	chrX	7241307	7241328	-	22	3.22745	3.98066	1.23338
mmu-miR-26b-3p	chr1	74394360	74394381	+	22	3.84657	4.72429	1.22818
mmu-miR-181c-3p	chr8	84178885	84178906	-	22	9.26853	11.3599	1.22565
mmu-miR-1968-5p	chr8	13189068	13189091	-	24	5.81292	7.12314	1.2254
mmu-miR-879-5p	chr5	9375714	9375734	+	21	4.70588	5.74527	1.22087
mmu-miR-194-5p	chr1	185313325	185313346	+	22	5.17543	6.2834	1.21408
mmu-miR-30d-3p	chr15	68341217	68341238	-	22	6.28481	7.59417	1.20834
mmu-miR-339-5p	chr5	139369708	139369730	-	23	5.89634	7.07332	1.19961
mmu-miR-877-5p	chr17	35960795	35960814	-	20	9.87345	11.816	1.19674
mmu-miR-125b-5p	chr16	77646279	77646300	+	22	4.39771	5.25788	1.19559
mmu-miR-1199-5p	chr8	84011594	84011613	-	20	5.03524	6.01969	1.19551
mmu-miR-27b-5p	chr13	63300718	63300739	+	22	5.9752	7.13533	1.19416
mmu-miR-302a-3p	chr3	127545539	127545561	+	23	5.03524	6.00648	1.19289
mmu-miR-3057-5p	chr10	81271610	81271633	+	24	6.59057	7.83743	1.18919
mmu-miR-203-3p	chr12	112130927	112130948	+	22	6.22152	7.35452	1.18211
mmu-miR-1981-5p	chr1	184822465	184822488	-	24	6.04997	7.14742	1.1814
mmu-miR-331-3p	chr10	93963783	93963803	-	21	5.72437	6.73977	1.17738
mmu-miR-15b-3p	chr3	69009813	69009834	+	22	4.50791	5.30181	1.17611
mmu-let-7c-5p	chr15	85706616	85706637	+	22	7.02057	8.23304	1.1727
mmu-miR-676-3p	chrX	100381151	100381171	+	21	7.95789	9.30132	1.16882
mmu-miR-196a-1-3p	chr11	96265225	96265246	+	22	5.03524	5.88178	1.16812
mmu-miR-673-3p	chr12	109572044	109572066	+	23	6.86359	7.9929	1.16454
mmu-miR-199a-3p	chr1	162217883	162217904	+	22	6.34544	7.38547	1.1639
mmu-miR-30c-2-3p	chr1	23291754	23291775	+	22	5.81292	6.76353	1.16353
mmu-miR-339-3p	chr5	139369673	139369695	-	23	5.03524	5.8377	1.15937
mmu-miR-295-5p	chr7	3220779	3220800	+	22	10.0726	11.6573	1.15732
mmu-miR-667-5p	chr12	109720020	109720044	+	25	4.50791	5.21257	1.15632
mmu-let-7d-3p	chr13	48536024	48536045	-	22	4.00531	4.62405	1.15448
mmu-miR-666-3p	chr12	109717140	109717161	+	22	7.54479	8.70119	1.15327
mmu-miR-100-5p	chr9	41531437	41531458	+	22	3.66818	4.22838	1.15272
mmu-miR-455-5p	chr4	63256867	63256888	+	22	3.46458	3.98066	1.14896
mmu-miR-671-3p	chr5	24592171	24592191	+	21	5.03524	5.77674	1.14726
mmu-miR-199b-3p	chr2	32318524	32318545	+	22	5.72437	6.55247	1.14466
mmu-miR-127-5p	chr12	109592854	109592875	+	22	7.63256	8.67429	1.13648
mmu-miR-30e-3p	chr4	120772618	120772639	-	22	8.61051	9.76957	1.13461
mmu-miR-129-5p	chr2	94241419	94241439	-	21	5.5291	6.26132	1.13243
mmu-miR-296-3p	chr2	174267058	174267079	-	22	8.20695	9.29046	1.13202
mmu-miR-652-3p	chrX	142739060	142739080	+	21	4.1483	4.69165	1.13098
mmu-miR-30a-3p	chr1	23272315	23272336	+	22	8.23926	9.29182	1.12775
mmu-miR-7068-3p	chr8	72470016	72470036	-	21	4.61029	5.18937	1.12561
mmu-miR-412-5p	chr12	109743303	109743325	+	23	4.39771	4.93422	1.122
mmu-miR-342-3p	chr12	108658680	108658702	+	23	7.46506	8.36053	1.11995
mmu-miR-23b-3p	chr13	63300529	63300549	+	21	8.24723	9.2005	1.11559
mmu-miR-3068-3p	chr12	87437685	87437706	-	22	6.08595	6.77915	1.1139
mmu-miR-222-3p	chrX	19146903	19146923	-	21	8.08779	9.00841	1.11383
mmu-miR-7224-3p	chr2	67675496	67675516	+	21	5.17543	5.7611	1.11316
mmu-miR-542-3p	chrX	53049415	53049436	-	22	6.15533	6.84	1.11123
mmu-let-7a-5p	chr13	48538239	48538260	-	22	7.36611	8.17221	1.10943
mmu-miR-154-5p	chr12	109738438	109738459	+	22	4.79553	5.30181	1.10557
mmu-miR-138-5p	chr8	94324312	94324334	+	23	6.6154	7.30682	1.10452
mmu-miR-190a-5p	chr9	67236700	67236721	-	22	4.27839	4.72429	1.10422
mmu-miR-322-3p	chrX	53054269	53054289	-	21	5.72437	6.3159	1.10333
mmu-miR-5128	chr2	37688212	37688234	-	23	5.5291	6.09652	1.10262
mmu-miR-141-3p	chr6	124717917	124717938	-	22	7.16213	7.88874	1.10145
mmu-miR-219a-1-3p	chr17	34025010	34025031	-	22	4.00531	4.39987	1.09851
mmu-miR-743b-3p	chrX	66777266	66777287	-	22	4.39771	4.81803	1.09558
mmu-miR-375-3p	chr1	74900661	74900682	-	22	5.89634	6.45856	1.09535
mmu-miR-539-5p	chr12	109728136	109728157	+	22	4.61029	5.04176	1.09359
mmu-miR-33-5p	chr15	82198127	82198147	+	21	5.58045	6.09652	1.09248
mmu-miR-3082-3p	chr17	25831366	25831387	-	22	2.94352	3.21423	1.09197
mmu-miR-543-3p	chr12	109717304	109717325	+	22	9.45205	10.3022	1.08994
mmu-miR-92a-1-5p	chr14	115044437	115044459	+	23	9.78044	10.6527	1.08918
mmu-miR-3473d	chr8	111016498	111016521	-	24	7.65669	8.31838	1.08642
mmu-miR-499-5p	chr2	155622893	155622913	+	21	3.66818	3.98066	1.08519
mmu-miR-1191a	chr7	27205615	27205635	+	21	5.9752	6.46823	1.08251
mmu-miR-130b-5p	chr16	17124109	17124130	-	22	9.93639	10.7406	1.08093
mmu-miR-16-2-3p	chr3	69009960	69009981	+	22	4.27839	4.62405	1.08079
mmu-miR-370-3p	chr12	109618305	109618326	+	22	9.05368	9.76172	1.0782
mmu-miR-148a-5p	chr6	51269867	51269888	-	22	7.64467	8.24152	1.07807
mmu-miR-449c-5p	chr13	113036008	113036028	+	21	4.00531	4.31667	1.07774
mmu-miR-669m-5p	chr2	10512814	10512836	+	23	4.39771	4.72429	1.07426

## Sheet: RIP AGO1 down
Table S2: RIP-seq log2+1 of CPM values in Input WT and AGO1 RIP. Table highlighting miRNAs that are not loaded in AGO1 compared to Input. The lowest 20% AGO1 RIP/Input were selected and all values equal 0 were excluded from the calculation. Related to Fig S4F.
Geneid	Chr	Start	End	Strand	Length	Input_E14	RIP_E14_AGO1	RIP/Input	Lowest 20% RIP/Input (excluded 0 values)
mmu-miR-205-3p	chr1	193507467	193507488	-	22	5.9752	0.670366	0.112191
mmu-miR-297c-3p	chr2	10509065	10509086	+	22	4.95968	0.670366	0.135163
mmu-miR-297b-3p	chr2	10511723	10511744	+	22	4.95968	0.670366	0.135163
mmu-miR-297a-3p	chr2	10515869	10515890	+	22	4.95968	0.670366	0.135163
mmu-miR-7091-5p	chrX	74274083	74274105	-	23	4.39771	0.670366	0.152435
mmu-miR-22-5p	chr11	75463734	75463755	+	22	4.1483	0.670366	0.1616
mmu-miR-542-5p	chrX	53049453	53049474	-	22	4.00531	0.670366	0.167369
mmu-miR-98-5p	chrX	151913229	151913250	+	22	3.66818	0.670366	0.182752
mmu-miR-7238-5p	chr8	11635719	11635736	-	18	3.46458	0.670366	0.193491
mmu-miR-6395	chr8	34166689	34166710	-	22	3.46458	0.670366	0.193491
mmu-miR-410-5p	chr12	109743729	109743749	+	21	3.22745	0.670366	0.207708
mmu-miR-382-3p	chr12	109733819	109733840	+	22	5.10704	1.12628	0.220535
mmu-miR-323-5p	chr12	109712523	109712544	+	22	2.94352	0.670366	0.227743
mmu-miR-669e-5p	chr2	10467537	10467558	+	22	2.94352	0.670366	0.227743
mmu-miR-3067-3p	chr12	81166201	81166223	+	23	2.94352	0.670366	0.227743
mmu-miR-466o-3p	chr2	10472589	10472610	+	22	2.58968	0.670366	0.25886
mmu-miR-466a-5p	chr2	10507928	10507949	+	22	2.58968	0.670366	0.25886
mmu-miR-193b-5p	chr16	13449533	13449554	+	22	2.58968	0.670366	0.25886
mmu-miR-6937-5p	chr12	28679325	28679348	+	24	2.58968	0.670366	0.25886
mmu-miR-18b-3p	chrX	52742342	52742363	-	22	5.03524	1.47219	0.292378
mmu-miR-770-5p	chr12	109563710	109563731	+	22	3.66818	1.12628	0.307041
mmu-miR-29c-3p	chr1	195037600	195037621	+	22	4.70588	1.47219	0.31284
mmu-miR-374b-5p	chrX	103573112	103573133	-	22	4.70588	1.47219	0.31284
mmu-miR-107-5p	chr19	34820737	34820759	-	23	2.11983	0.670366	0.316235
mmu-miR-326-3p	chr7	99552328	99552348	+	21	5.47585	1.75099	0.319766
mmu-miR-3074-1-3p	chr13	63301211	63301232	-	22	3.46458	1.12628	0.325084
mmu-miR-486a-3p	chr8	23142629	23142649	+	21	3.46458	1.12628	0.325084
mmu-miR-700-5p	chr4	135416601	135416622	-	22	4.50791	1.47219	0.326579
mmu-miR-130a-5p	chr2	84741155	84741176	-	22	4.27839	1.47219	0.344099
mmu-miR-152-3p	chr11	96850439	96850459	+	21	3.22745	1.12628	0.348969
mmu-miR-133a-3p	chr18	10782913	10782934	-	22	3.22745	1.12628	0.348969
mmu-miR-7226-3p	chr4	118210505	118210527	-	23	4.1483	1.47219	0.35489
mmu-miR-218-5p	chr11	35616840	35616860	+	21	5.67798	2.36186	0.415969
mmu-miR-378d	chr10	126710355	126710376	-	22	2.58968	1.12628	0.434911
mmu-miR-146a-5p	chr11	43374435	43374456	-	22	4.00531	1.75099	0.437168
mmu-miR-34a-3p	chr4	150068517	150068537	+	21	4.50791	1.98455	0.440236
mmu-miR-874-3p	chr13	58023135	58023156	-	22	4.87994	2.1855	0.447855
mmu-miR-1306-5p	chr16	18284288	18284310	-	23	4.70588	2.1855	0.464419
mmu-miR-6960-5p	chr15	99080810	99080831	+	22	4.70588	2.1855	0.464419
mmu-miR-466p-5p	chr2	10506020	10506040	+	21	1.41858	0.670366	0.472561
mmu-miR-125a-3p	chr17	17830855	17830876	+	22	2.94352	1.47219	0.500146
mmu-miR-8094	chr17	35251314	35251334	+	21	5.03524	2.66067	0.528411
mmu-miR-302b-3p	chr3	127545275	127545297	+	23	4.00531	2.1855	0.545652
mmu-miR-1193-3p	chr12	109715750	109715770	+	21	6.43186	3.54183	0.55067
mmu-miR-29b-3p	chr1	195037091	195037113	+	23	3.84657	2.1855	0.56817
mmu-miR-3091-5p	chr2	180257547	180257567	+	21	4.27839	2.51899	0.588771
mmu-miR-871-3p	chrX	66810438	66810460	-	23	5.93631	3.6133	0.608678
mmu-miR-465b-3p	chrX	66829212	66829233	-	22	6.12106	3.74642	0.612054
mmu-miR-465a-3p	chrX	66839063	66839084	-	22	6.12106	3.74642	0.612054
mmu-miR-465c-3p	chrX	66825965	66825986	-	22	6.12106	3.74642	0.612054
mmu-miR-1191b-5p	chr10	81416276	81416297	-	22	3.84657	2.36186	0.614018
mmu-miR-299a-5p	chr12	109710644	109710665	+	22	3.22745	1.98455	0.614896
mmu-miR-382-5p	chr12	109733781	109733802	+	22	6.66382	4.13433	0.620415
mmu-miR-5126	chr1	84695890	84695911	+	22	5.10704	3.21423	0.629373
mmu-miR-6958-3p	chr15	89185465	89185487	-	23	3.46458	2.1855	0.630814
mmu-miR-466g	chr2	10514642	10514662	+	21	4.95968	3.21423	0.648072
mmu-miR-877-3p	chr17	35960731	35960752	-	22	4.79553	3.11922	0.650443
mmu-miR-302d-3p	chr3	127545665	127545687	+	23	5.67798	3.74642	0.659816
mmu-miR-96-3p	chr6	30169465	30169486	-	22	4.95968	3.30336	0.666044
mmu-miR-5121	chr7	45126925	45126945	-	21	5.42057	3.6133	0.666591
mmu-miR-7a-5p	chr13	58392841	58392863	-	23	4.1483	2.78968	0.672487
mmu-miR-6927-3p	chr11	97677106	97677126	+	21	2.58968	1.75099	0.676143
mmu-miR-7082-3p	chr9	21075499	21075520	-	22	4.61029	3.11922	0.676578
mmu-miR-147-3p	chr2	122640850	122640871	+	22	5.58045	3.80864	0.682497
mmu-miR-1197-3p	chr12	109712396	109712416	+	21	6.45955	4.47853	0.693319
mmu-miR-5100	chr11	60728698	60728718	+	21	5.81292	4.03372	0.693924
mmu-miR-669m-3p	chr2	10512847	10512868	+	22	2.11983	1.47219	0.694484
mmu-miR-5099	chr12	36816250	36816269	+	20	11.356	7.89233	0.69499
mmu-miR-466h-5p	chr2	10514901	10514922	+	22	6.51339	4.58902	0.704551
mmu-miR-672-3p	chrX	104116192	104116212	-	21	4.79553	3.38731	0.706347
mmu-miR-582-5p	chr13	109324753	109324774	+	22	6.22152	4.47853	0.719844
mmu-miR-669o-5p	chr2	10514318	10514340	+	23	5.5291	4.0849	0.738801
mmu-miR-101c	chr9	3038680	3038698	-	19	5.63004	4.18212	0.742823
mmu-miR-540-5p	chr12	109586085	109586107	+	23	5.63004	4.22838	0.751039
mmu-miR-3102-3p	chr7	100882307	100882329	-	23	5.36308	4.03372	0.752128
mmu-miR-6988-3p	chr19	6051371	6051392	+	22	3.46458	2.66067	0.767965
mmu-miR-1843b-3p	chr1	159340400	159340419	+	20	4.1483	3.21423	0.77483
mmu-miR-770-3p	chr12	109563744	109563765	+	22	5.3032	4.13433	0.779592
mmu-miR-6538	chr12	26414970	26414988	-	19	8.7516	6.82503	0.77986
mmu-miR-193b-3p	chr16	13449570	13449591	+	22	5.72437	4.47853	0.782361
mmu-miR-6240	chr5	114851973	114851998	+	26	10.8322	8.52012	0.786555
mmu-miR-24-2-5p	chr8	84208839	84208860	+	22	6.73353	5.30181	0.787374
mmu-miR-466n-3p	chr2	10513798	10513819	+	22	5.17543	4.0849	0.789288
mmu-miR-7075-3p	chr8	107096025	107096045	-	21	3.66818	2.90809	0.792788
mmu-miR-6948-3p	chr14	54643050	54643070	-	21	1.41858	1.12628	0.79395
mmu-miR-379-5p	chr12	109709065	109709085	+	21	6.01307	4.78745	0.796175
mmu-miR-296-5p	chr2	174267093	174267113	-	21	7.27553	5.85254	0.804414
mmu-miR-466c-5p	chr2	10481544	10481567	+	24	4.39771	3.54183	0.805381
mmu-miR-18a-3p	chr14	115043908	115043929	+	22	7.17888	5.8377	0.813176
mmu-miR-6911-3p	chr10	80278212	80278232	+	21	2.11983	1.75099	0.826005
mmu-miR-126a-3p	chr2	26591402	26591423	+	22	7.25987	6.00648	0.827354
mmu-miR-193a-3p	chr11	79712009	79712030	+	22	5.3032	4.39987	0.829663
mmu-miR-350-5p	chr1	176772382	176772400	-	19	4.95968	4.13433	0.833589
mmu-miR-669f-3p	chr2	10467285	10467307	+	23	3.84657	3.21423	0.835609
mmu-miR-30b-5p	chr15	68337469	68337490	-	22	9.29567	7.84115	0.843527
mmu-miR-411-3p	chr12	109710225	109710246	+	22	8.80115	7.43563	0.844847
mmu-miR-7079-3p	chr8	123105023	123105043	+	21	4.00531	3.38731	0.845705
mmu-miR-148b-5p	chr15	103285148	103285171	+	24	8.05185	6.81748	0.846697
mmu-miR-1247-5p	chr12	110278094	110278115	-	22	6.01307	5.09266	0.846932
mmu-miR-376a-5p	chr12	109723786	109723807	+	22	7.24403	6.16947	0.851662
mmu-miR-330-5p	chr7	19181486	19181507	+	22	8.65311	7.37008	0.851727
mmu-miR-669l-5p	chr2	10468989	10469010	+	22	6.88418	5.86723	0.852278
mmu-miR-370-5p	chr12	109618270	109618289	+	20	6.12106	5.2354	0.85531
mmu-miR-29a-3p	chr6	31062673	31062694	-	22	7.29103	6.29432	0.863296
mmu-miR-124-3p	chr14	64590709	64590728	+	20	7.24403	6.2724	0.865872
mmu-miR-466f	chr13	71107108	71107129	+	22	4.39771	3.80864	0.866051
mmu-miR-466f-5p	chr2	10466954	10466975	+	22	4.39771	3.80864	0.866051
mmu-miR-10b-5p	chr2	74726074	74726096	+	23	6.28481	5.4458	0.866502
mmu-miR-135b-3p	chr1	132198142	132198163	+	22	7.07529	6.15756	0.870291
mmu-miR-135b-5p	chr1	132198103	132198125	+	23	7.6686	6.67444	0.87036
mmu-miR-1193-5p	chr12	109715716	109715735	+	20	4.1483	3.6133	0.871032
mmu-miR-377-3p	chr12	109740553	109740574	+	22	7.77161	6.77915	0.872296
mmu-miR-466d-5p	chr2	10511977	10511998	+	22	5.17543	4.51631	0.872644
mmu-miR-466n-5p	chr2	10513759	10513780	+	22	5.17543	4.51631	0.872644
mmu-miR-467e-5p	chr2	10505731	10505752	+	22	6.73353	5.88178	0.873506
mmu-miR-96-5p	chr6	30169506	30169528	-	23	8.91554	7.81107	0.876119
mmu-miR-182-3p	chr6	30165923	30165943	-	21	6.34544	5.57672	0.878855
mmu-miR-496a-3p	chr12	109739165	109739186	+	22	4.95968	4.35887	0.878862
mmu-let-7d-5p	chr13	48536078	48536099	-	22	6.45955	5.69674	0.88191
mmu-miR-3098-5p	chr6	125195807	125195828	+	22	5.10704	4.51631	0.88433
mmu-miR-21a-3p	chr11	86584082	86584103	-	22	6.71066	5.95238	0.887003
mmu-miR-669c-5p	chr2	10509319	10509340	+	22	6.92448	6.14556	0.887512
mmu-miR-149-5p	chr1	92850381	92850403	+	23	9.79953	8.71344	0.889169
mmu-miR-376b-3p	chr12	109723508	109723528	+	21	9.87345	8.80213	0.891495
mmu-miR-188-5p	chrX	7248031	7248051	-	21	6.34544	5.6802	0.895162
mmu-miR-191-3p	chr9	108568367	108568388	+	22	4.61029	4.13433	0.896761
mmu-miR-664-3p	chr1	185243012	185243033	+	22	4.70588	4.22838	0.89853
mmu-miR-501-3p	chrX	7241270	7241291	-	22	5.72437	5.1658	0.902421
mmu-miR-28a-5p	chr16	24827868	24827889	+	22	9.75273	8.80595	0.902922
mmu-miR-298-3p	chr2	174267514	174267535	-	22	4.1483	3.74642	0.903122
mmu-miR-380-3p	chr12	109711842	109711863	+	22	10.0659	9.09522	0.903567
mmu-miR-337-3p	chr12	109585850	109585871	+	22	4.50791	4.0849	0.906163
mmu-miR-16-5p	chr14	61631936	61631957	-	22	13.4589	12.1965	0.906204
mmu-miR-324-5p	chr11	70012060	70012082	+	23	4.79553	4.35887	0.908943
mmu-miR-345-3p	chr12	108837027	108837048	+	22	4.95968	4.51631	0.910605
mmu-miR-1934-5p	chr11	69663055	69663077	+	23	6.31545	5.7611	0.912223
mmu-miR-19a-3p	chr14	115044048	115044070	+	23	9.57107	8.7456	0.913754
mmu-miR-674-3p	chr2	117185186	117185207	+	22	8.43331	7.71687	0.915047
